# Supplementary material for: Silicon isotopic composition of zircon reference materials by ns-LA-MC-ICP-MS
Source: Royal Society of Chemistry journal article supplement (doi:10.1039/d5ja00518c), 2026-01-01
Supplement: d5ja00518c1.xlsx [file d5ja00518c1.xlsx]

## Sheet: Table S1 Single spot
Table S1 Long term precision of single spot
Sample	28Si	29Si	30Si	29Si/28Si	2SE	30Si/28Si	2SE		δ29Si (‰)	2SE	δ30Si (‰)	2SE
MTUR1 01	17.02	0.895	0.615	0.0526069	5.1e-06	0.0361209	3.4e-06		-0.0855328	0.148532	-0.0359889	0.144489
MTUR1 02	16.86	0.887	0.609	0.0526066	4.7e-06	0.0361188	2.8e-06		-0.0019009	0.153149	-0.0996612	0.140212
MTUR1 03	17.48	0.92	0.632	0.0526065	4.1e-06	0.0361239	2.5e-06		-0.00950444	0.148452	0.12874	0.133033
MTUR1 04	17.06	0.898	0.616	0.0526074	4.7e-06	0.0361197	3e-06		-0.0427678	0.137846	-0.128722	0.126893
MTUR1 05	16.81	0.884	0.607	0.0526128	3.7e-06	0.0361248	2.4e-06		0.0912409	0.141147	0.179964	0.140217
MTUR1 06	16.81	0.884	0.607	0.0526086	4.4e-06	0.0361169	3.3e-06		0.0152069	0.136466	-0.0747517	0.143574
MTUR1 07	16.88	0.888	0.61	0.0526028	4.3e-06	0.0361144	3.2e-06		-0.0731847	0.143782	-0.0332266	0.16514
MTUR1 08	17.49	0.92	0.632	0.0526047	4.4e-06	0.0361143	3.8e-06		-0.0171084	0.140542	-0.0581453	0.163623
MTUR1 09	16.71	0.879	0.604	0.0526084	4.1e-06	0.0361184	3.2e-06		0.0209096	0.143927	-0.00830595	0.159267
MTUR1 10	16.81	0.884	0.607	0.0526099	4.6e-06	0.0361231	2.9e-06		0.0570267	0.154497	0.125974	0.164864
MTUR1 11	17.62	0.927	0.636	0.0526054	5.3e-06	0.0361187	4.1e-06		-0.119745	0.166023	-0.152253	0.177738
MTUR1 12	18.18	0.956	0.657	0.0526135	5.2e-06	0.0361253	4e-06		0.178693	0.168063	0.232578	0.18879
MTUR1 13	16.66	0.876	0.602	0.0526028	4.8e-06	0.0361151	3.7e-06		-0.169164	0.168058	-0.145347	0.183922
MTUR1 14	16.51	0.869	0.596	0.0526099	5.3e-06	0.0361154	3.8e-06		0.0608288	0.159593	0.00969125	0.175952
MTUR1 15	16.54	0.87	0.597	0.0526106	4.4e-06	0.036115	3.5e-06		0.103602	0.154357	0.024921	0.165421
MTUR1 16	16.8	0.884	0.607	0.0526004	4.3e-06	0.0361128	3e-06		-0.176773	0.155606	-0.159198	0.155374
MTUR1 17	18.41	0.969	0.665	0.0526088	5.4e-06	0.0361221	3.2e-06		0.0921984	0.192367	0.173054	0.164358
MTUR1 18	19.16	1.008	0.692	0.0526075	7.4e-06	0.0361189	4e-06		0.0370683	0.187803	0.0636826	0.179951
MTUR1 19	16.63	0.875	0.601	0.0526023	3.7e-06	0.0361111	4e-06		-0.0608301	0.180879	-0.123216	0.193454
MTUR1 20	15.48	0.814	0.559	0.0526035	4.7e-06	0.0361122	4.1e-06		-0.0275639	0.144611	-0.0955265	0.180349
MTUR1 21	16.34	0.86	0.59	0.0526076	4.7e-06	0.0361202	3.1e-06		-0.00760341	0.160416	0.0235331	0.166191
MTUR1 22	18.01	0.948	0.651	0.0526125	5.2e-06	0.0361265	3.1e-06		0.180598	0.158334	0.250571	0.155311
MTUR1 23	16.51	0.869	0.597	0.052612	4.3e-06	0.0361246	2.8e-06		0.211023	0.154179	0.175811	0.157444
MTUR1 24	17.18	0.904	0.62	0.0526034	5.2e-06	0.0361218	3.5e-06		-0.106446	0.160781	-0.0816615	0.154081
MTUR1 25	16.48	0.867	0.595	0.052606	5.1e-06	0.0361249	3.3e-06		-0.0570245	0.166865	0.0761306	0.171435
MTUR1 26	17.62	0.927	0.636	0.0526146	4.9e-06	0.0361225	3.9e-06		0.177739	0.152611	-0.030451	0.166881
MTUR1 27	16.61	0.874	0.6	0.0526045	3.8e-06	0.0361223	3.2e-06		-0.0313652	0.144532	0.228443	0.173223
MTUR1 28	16.41	0.863	0.592	0.0525977	4.4e-06	0.0361056	3.7e-06		-0.0494294	0.135251	-0.294881	0.161872
MTUR1 29	16.56	0.871	0.598	0.0525961	4.1e-06	0.0361102	3.2e-06		-0.0342219	0.137324	0.0290785	0.160386
MTUR1 30	16.8	0.884	0.607	0.0525981	4e-06	0.0361127	3.1e-06		-0.0038024	0.128624	-0.0152299	0.147206
MTUR1 31	16.94	0.891	0.612	0.0526005	3.6e-06	0.0361163	2.9e-06		-0.0209119	0.132149	0.101073	0.147202
MTUR1 32	16.79	0.883	0.606	0.0526051	4.4e-06	0.0361126	3.2e-06		0.108366	0.139027	-0.0789136	0.14404
MTUR1 33	16.91	0.89	0.611	0.0525983	4.6e-06	0.0361146	2.9e-06		-0.0646367	0.148202	0.0609209	0.153927
MTUR1 34	16.89	0.889	0.61	0.0525983	4.5e-06	0.0361122	3.5e-06		-0.0427752	0.15729	-0.0415355	0.157181
MTUR1 35	17.69	0.931	0.639	0.0526028	5.2e-06	0.0361128	3.4e-06		0.0617876	0.154189	0.0720018	0.163126
MTUR1 36	16.98	0.893	0.613	0.0526008	4.3e-06	0.0361082	3.3e-06		-0.0845923	0.186197	-0.193824	0.163118
MTUR1 37	17.84	0.939	0.644	0.0526077	7.1e-06	0.0361176	3.5e-06		0.165402	0.17771	0.216008	0.166378
MTUR1 38	17.95	0.944	0.648	0.0525972	4.3e-06	0.0361114	3.6e-06		-0.191038	0.179486	-0.134289	0.163393
MTUR1 39	17.21	0.905	0.621	0.0526068	4.5e-06	0.0361149	3.1e-06		0.119771	0.146009	0.0498434	0.16177
MTUR1 40	18.1	0.952	0.654	0.0526038	4.5e-06	0.0361148	3.4e-06		-0.0798358	0.138988	-0.0179978	0.153619
MTUR1 41	17.28	0.909	0.624	0.0526092	3.6e-06	0.036116	3.1e-06		0.0722359	0.141359	0.00830664	0.158408
MTUR1 42	17.27	0.908	0.624	0.052607	4.7e-06	0.0361166	3.4e-06		-0.00855392	0.134762	0.0290733	0.160068
MTUR1 43	17.42	0.917	0.629	0.0526057	3.9e-06	0.0361151	3.5e-06		-0.0180586	0.137747	-0.0263041	0.160069
MTUR1 44	17.91	0.942	0.647	0.0526063	3.9e-06	0.0361155	3.1e-06		-0.00855404	0.137746	0.0027689	0.150899
MTUR1 45	17.44	0.918	0.63	0.0526078	4.7e-06	0.0361157	2.8e-06		0.00095043	0.145338	0.00276889	0.144035
MTUR1 46	17.37	0.914	0.627	0.0526092	4.6e-06	0.0361157	3.1e-06		-0.00665278	0.147309	-0.0526059	0.147396
MTUR1 47	17.47	0.919	0.631	0.0526113	4.1e-06	0.0361195	3.3e-06		0.126415	0.145043	0.141218	0.150386
MTUR1 48	17.24	0.907	0.623	0.0526001	4.5e-06	0.0361131	3e-06		-0.0988494	0.138474	-0.109367	0.150388
MTUR1 49	17.27	0.909	0.624	0.0525993	4e-06	0.0361146	3.1e-06		-0.0950493	0.137416	-0.0622978	0.150386
MTUR1 50	17.5	0.92	0.632	0.0526085	4e-06	0.0361206	3.3e-06		0.134027	0.142271	0.167523	0.155127
MTUR1 51	17.54	0.923	0.633	0.0526036	4.9e-06	0.0361145	3.3e-06		-0.133053	0.160583	-0.143966	0.171994
MTUR1 52	18.69	0.983	0.675	0.0526127	5.6e-06	0.0361188	4.1e-06		0.0978947	0.164317	0.0622983	0.176549
MTUR1 53	17.51	0.921	0.632	0.0526115	4.4e-06	0.0361186	3.6e-06		0.0408673	0.161151	0.0512228	0.171079
MTUR1 54	17.18	0.904	0.621	0.052606	4.6e-06	0.0361147	2.9e-06		-0.110241	0.162413	-0.174414	0.160531
MTUR1 55	18.61	0.979	0.672	0.0526121	5.7e-06	0.0361234	3.5e-06		0.124512	0.160494	0.257517	0.162274
MTUR1 56	17.23	0.906	0.622	0.0526051	4.2e-06	0.0361135	3.7e-06		-0.0817344	0.159465	-0.235314	0.172679
MTUR1 57	17.53	0.922	0.633	0.0526067	4.5e-06	0.0361206	3.6e-06		0.0522774	0.142737	0.272772	0.180838
MTUR1 58	17.22	0.906	0.622	0.052603	4.4e-06	0.0361121	3.4e-06		-0.0988439	0.145094	-0.13567	0.152393
MTUR1 59	17.78	0.935	0.642	0.0526035	4.7e-06	0.0361132	3.3e-06		-0.0237621	0.146129	0.00276908	0.164777
MTUR1 60	18.15	0.955	0.656	0.0526065	4.2e-06	0.0361141	3.6e-06		-0.0190087	0.165418	-0.0692202	0.1632
MTUR1 61	19.05	1.002	0.688	0.0526115	6e-06	0.03612	3.3e-06		0.0712823	0.15772	0.19799	0.155872
MTUR1 62	16.53	0.87	0.597	0.0526237	4.5e-06	0.0361255	3.9e-06		0.238543	0.147781	0.247809	0.161286
MTUR1 63	17.81	0.937	0.643	0.0526133	5e-06	0.0361215	3.3e-06		-0.113076	0.155959	-0.0885821	0.158686
MTUR1 64	17.8	0.937	0.643	0.0526148	4.7e-06	0.0361239	2.6e-06		0.0475174	0.151934	0.0359886	0.144538
MTUR1 65	17.85	0.939	0.645	0.0526113	4.1e-06	0.0361237	3.1e-06		-0.0256592	0.141866	-0.0207616	0.142798
MTUR1 66	19.04	1.002	0.688	0.0526105	4.1e-06	0.036125	3.2e-06		-0.0123548	0.14187	0.0775147	0.148692
MTUR1 67	18.28	0.962	0.66	0.052611	4.7e-06	0.0361207	3e-06		0.160639	0.150777	0.0332231	0.155362
MTUR1 68	17.77	0.935	0.642	0.0525946	4.9e-06	0.036114	3.5e-06		-0.204352	0.161436	-0.130126	0.161945
MTUR1 69	18.12	0.953	0.654	0.0525997	5.1e-06	0.0361167	3.6e-06		0.0266168	0.155422	0.0221509	0.164857
MTUR1 70	17.69	0.93	0.639	0.052602	4.1e-06	0.0361178	3.2e-06		-0.0921933	0.168763	-0.123193	0.176919
MTUR1 71	19.01	1	0.687	0.052614	6e-06	0.0361278	4.2e-06		0.0826845	0.16659	0.10104	0.180073
MTUR1 72	18	0.947	0.65	0.0526173	4.9e-06	0.0361305	3.8e-06		-0.00665176	0.168388	0.0525899	0.177402
MTUR1 73	17.69	0.931	0.639	0.0526213	4.3e-06	0.0361294	3e-06		0.153954	0.150553	0.175788	0.157659
MTUR1 74	17.74	0.934	0.641	0.0526091	4.5e-06	0.0361156	3e-06		-0.100733	0.154157	-0.20624	0.134947
MTUR1 75	17.17	0.903	0.62	0.0526075	5.2e-06	0.0361167	2.4e-06		-0.0446684	0.15122	0.00553764	0.142048
MTUR1 76	17.44	0.917	0.63	0.0526106	4e-06	0.0361174	3.4e-06		0.0332644	0.146054	-0.00138437	0.142045
MTUR1 77	17.4	0.915	0.628	0.0526102	4e-06	0.0361182	3e-06		0.0171072	0.141018	0.0332254	0.147551
MTUR1 78	17.28	0.909	0.624	0.052608	4.8e-06	0.0361166	2.8e-06		-0.12069	0.139997	-0.152261	0.145787
MTUR1 79	17.62	0.927	0.637	0.0526185	3.9e-06	0.036126	3.3e-06		0.0598685	0.144256	0.074744	0.144212
MTUR1 80	17.55	0.923	0.634	0.0526227	4.4e-06	0.03613	2.9e-06		0.0978761	0.144246	0.173016	0.153775
MTUR1 81	18.4	0.968	0.665	0.0526166	4.8e-06	0.0361215	3.4e-06		-0.0608136	0.147259	-0.112109	0.155443
MTUR1 82	17.56	0.924	0.634	0.0526169	4.2e-06	0.0361211	3.4e-06		0.144461	0.156417	0.105213	0.16466
MTUR1 83	17.15	0.902	0.619	0.052602	5.2e-06	0.0361131	3.5e-06		-0.257528	0.156419	-0.250539	0.157156
MTUR1 84	18.36	0.966	0.663	0.0526142	4.8e-06	0.0361232	2.9e-06		0.0769813	0.158391	0.0761342	0.14927
MTUR1 85	17.54	0.923	0.634	0.0526183	4.4e-06	0.0361278	2.9e-06		-0.0437091	0.14328	0.0401369	0.132953
MTUR1 86	17.55	0.923	0.634	0.052627	3.8e-06	0.0361295	2.5e-06		0.0969178	0.137414	0.037367	0.131293
MTUR1 87	17.54	0.923	0.634	0.0526255	4.3e-06	0.0361285	2.8e-06		0.015202	0.134018	-0.0249105	0.133001
MTUR1 88	17.66	0.929	0.638	0.0526224	4.1e-06	0.0361293	3e-06		-0.104507	0.143951	-0.0691911	0.15479
MTUR1 89	18.46	0.971	0.667	0.0526303	4.7e-06	0.0361351	3.8e-06		0.197644	0.147269	0.192371	0.16374
MTUR1 90	17.45	0.918	0.63	0.0526174	4.6e-06	0.036127	3.4e-06		-0.186215	0.144333	-0.244909	0.165152
MTUR1 91	17.53	0.922	0.633	0.0526241	3.8e-06	0.0361366	3.1e-06		0.0589118	0.140883	0.210357	0.163411
MTUR1 92	17.31	0.911	0.625	0.0526246	4.4e-06	0.036131	3.7e-06		0.0598615	0.145721	-0.0567348	0.15877
MTUR1 93	17.34	0.912	0.627	0.0526188	5e-06	0.0361295	3.1e-06		0.0123532	0.152761	0.109341	0.155869
MTUR1 94	17.46	0.919	0.631	0.0526117	4.5e-06	0.0361201	2.9e-06		-0.0864752	0.150723	-0.19376	0.143891
MTUR1 95	17.23	0.906	0.622	0.0526137	4.2e-06	0.0361247	3e-06		0.00570197	0.135535	0.0788996	0.145568
MTUR1 96	17.19	0.904	0.621	0.0526151	3.6e-06	0.0361236	3.2e-06		0.0399141	0.121463	-0.0249138	0.147107
MTUR1 97	16.98	0.893	0.613	0.0526123	3.2e-06	0.0361243	3e-06		-0.0532167	0.121461	0.00138411	0.147107
MTUR1 98	16.99	0.894	0.614	0.0526151	4.2e-06	0.0361249	3e-06		-0.0484628	0.131848	-0.0719673	0.145447
MTUR1 99	17.36	0.913	0.627	0.052623	4.5e-06	0.0361307	3.1e-06		0.0893225	0.141616	0.0345978	0.145434
MTUR1 100	17.69	0.931	0.639	0.0526215	4.2e-06	0.036134	3e-06		-0.00570106	0.138478	0.135625	0.143868
MTUR1 101	17.67	0.93	0.638	0.0526206	3.9e-06	0.0361275	2.9e-06		0.0370591	0.133924	-0.0941023	0.143872
MTUR1 102	17.64	0.928	0.637	0.0526158	4.1e-06	0.0361278	3.1e-06		-0.0978698	0.138589	-0.00138397	0.139253
MTUR1 103	18.08	0.952	0.653	0.0526213	4.6e-06	0.0361282	2.7e-06		0.129242	0.141726	0.106576	0.149455
MTUR1 104	17.27	0.909	0.624	0.0526132	4.2e-06	0.0361209	3.5e-06		-0.115927	0.13579	-0.156395	0.151066
MTUR1 105	17.47	0.919	0.631	0.0526173	3.5e-06	0.0361249	3.2e-06		0.0731752	0.138276	0.031835	0.16482
MTUR1 106	17.63	0.928	0.637	0.0526137	4.8e-06	0.0361266	3.6e-06		-0.0722193	0.139378	0.0346017	0.154221
MTUR1 107	17.43	0.917	0.63	0.0526177	4.3e-06	0.0361258	2.8e-06		0.0190054	0.14316	-0.0512073	0.146705
MTUR1 108	17.5	0.921	0.632	0.0526197	3.9e-06	0.0361287	2.7e-06		0.0408609	0.131861	0.0816592	0.132664
MTUR1 109	17.41	0.916	0.629	0.0526174	3.8e-06	0.0361257	2.8e-06		0.038962	0.128411	0.00692033	0.135978
MTUR1 110	17.03	0.896	0.615	0.052611	4e-06	0.0361222	3e-06		-0.325871	0.130625	-0.293362	0.152927
MTUR1 111	17.9	0.942	0.647	0.0526103	4.4e-06	0.0361277	3e-06		-0.23279	0.146242	-0.157749	0.160377
MTUR1 112	17.95	0.944	0.649	0.0526062	4.8e-06	0.0361269	3.3e-06		-0.121644	0.147283	-0.0387508	0.147249
MTUR1 113	17.97	0.945	0.649	0.0526149	4.2e-06	0.0361289	2.9e-06		0.154923	0.157631	0.0553604	0.155476
MTUR1 114	19.01	1	0.687	0.0526073	5.3e-06	0.0361269	3.5e-06		0.00190088	0.171854	0.0470586	0.1588
MTUR1 115	18.81	0.989	0.68	0.0525995	6e-06	0.0361215	3.5e-06		0.00760469	0.181489	0.00692113	0.163173
MTUR1 116	17.96	0.945	0.649	0.0525909	5.2e-06	0.0361156	3.2e-06		-0.148293	0.178396	-0.0249194	0.155374
MTUR1 117	17.36	0.913	0.627	0.0525979	5e-06	0.0361115	3e-06		0.0627441	0.159676	-0.098297	0.157128
MTUR1 118	17.56	0.923	0.634	0.0525983	4.3e-06	0.0361145	3.6e-06		-0.120712	0.157327	0.0152296	0.161956
MTUR1 119	17.78	0.936	0.642	0.0526114	5e-06	0.0361164	3.5e-06		0.157785	0.147611	-0.0622947	0.16054
MTUR1 120	18.44	0.97	0.666	0.0526079	4.1e-06	0.0361228	2.9e-06		-0.0997849	0.160123	0.0332211	0.158816
MTUR1 121	17.76	0.934	0.642	0.0526149	5.4e-06	0.0361268	3.5e-06		0.0902868	0.16357	0.0110722	0.158793
MTUR1 122	18.52	0.974	0.669	0.0526124	5.3e-06	0.03613	3.5e-06		0.0465691	0.167329	0.221472	0.167813
MTUR1 123	18.42	0.969	0.665	0.052605	4.5e-06	0.0361172	3.5e-06		-0.076983	0.159524	-0.197927	0.167825
MTUR1 124	17.78	0.935	0.642	0.0526057	4.7e-06	0.0361187	3.5e-06		-0.010455	0.153704	0.0124591	0.166259
MTUR1 125	17.88	0.941	0.646	0.0526075	4.8e-06	0.0361193	3.4e-06		-0.006653	0.156945	-0.0401431	0.158582
MTUR1 126	17.81	0.937	0.643	0.05261	4.8e-06	0.0361228	3e-06		-0.0741249	0.188073	-0.0927306	0.158559
MTUR1 127	17.89	0.941	0.646	0.0526048	4.5e-06	0.0361204	3.1e-06		-0.157755	0.185379	-0.188224	0.155286
MTUR1 128	17.78	0.935	0.642	0.0526059	4.8e-06	0.0361214	3.1e-06		-0.0161576	0.145392	0.116288	0.155318
MTUR1 129	17.77	0.935	0.642	0.0526152	4.6e-06	0.0361292	2.6e-06		-0.0237568	0.139674	0.181327	0.154774
MTUR1 130	17.61	0.927	0.636	0.0526242	4.2e-06	0.0361313	3.5e-06		0.0855193	0.147154	0.0124547	0.143414
MTUR1 131	17.65	0.929	0.638	0.0526242	4.6e-06	0.0361325	2.8e-06		0.0760164	0.155426	0.0622747	0.159114
MTUR1 132	17.48	0.92	0.631	0.0526162	5.3e-06	0.0361292	3.6e-06		-0.0703156	0.162666	-0.02491	0.141374
MTUR1 133	17.58	0.925	0.635	0.0526156	4.9e-06	0.0361277	2.3e-06		-0.0123536	0.160662	-0.0207593	0.14774
MTUR1 134	17.43	0.917	0.63	0.0526163	4.4e-06	0.0361277	3.2e-06		-0.0380096	0.152669	-0.0193753	0.14774
MTUR1 135	17.68	0.93	0.639	0.052621	4.6e-06	0.0361291	3.6e-06		0.0465615	0.14706	-0.00691958	0.163185
MTUR1 136	17.66	0.929	0.638	0.0526208	4.4e-06	0.036131	3.4e-06		0.0323077	0.149253	0.0705815	0.160247
MTUR1 137	17.41	0.916	0.629	0.0526172	4.6e-06	0.0361278	3e-06		-0.0779152	0.140888	-0.0733453	0.152028
MTUR1 138	17.58	0.925	0.635	0.0526218	3.8e-06	0.0361299	3.1e-06		0.0712683	0.137583	0.0691996	0.142352
MTUR1 139	17.56	0.924	0.634	0.0526189	4.1e-06	0.036127	2.8e-06		0.143505	0.132897	0.101043	0.14077
MTUR1 140	17.6	0.926	0.636	0.0526009	4.2e-06	0.0361168	2.9e-06		-0.322134	0.13718	-0.265734	0.135873
MTUR1 141	17.56	0.924	0.634	0.0526168	4.2e-06	0.0361258	2.8e-06		0.207201	0.157799	0.1495	0.14779
MTUR1 142	17.48	0.92	0.631	0.0526109	5.8e-06	0.036124	3.5e-06		-0.0608202	0.159748	0.00415238	0.149306
MTUR1 143	17.78	0.935	0.642	0.0526114	4.4e-06	0.0361219	3e-06		-0.176737	0.168932	-0.171612	0.160213
MTUR1 144	17.62	0.927	0.637	0.0526305	5.1e-06	0.0361322	3.5e-06		0.301247	0.15085	0.293453	0.153773
MTUR1 145	17.5	0.921	0.632	0.0526179	4.2e-06	0.0361213	3.1e-06		-0.107366	0.154079	-0.213125	0.170318
MTUR1 146	17.42	0.916	0.629	0.0526166	4.7e-06	0.0361258	4e-06		0.0275586	0.14291	0.08305	0.160103
MTUR1 147	17.46	0.919	0.631	0.0526124	4.1e-06	0.0361243	2.8e-06		0.0180569	0.151939	0.0456777	0.158639
MTUR1 148	17.42	0.916	0.629	0.0526063	5e-06	0.0361195	3e-06		-0.217607	0.147593	-0.185461	0.154821
MTUR1 149	17.33	0.912	0.626	0.0526231	4.3e-06	0.0361281	3.8e-06		0.166304	0.158441	0.0927342	0.160643
MTUR1 150	17.28	0.909	0.624	0.0526224	5.1e-06	0.03613	3.2e-06		0.00285051	0.15186	0.0567428	0.168205
MTUR1 151	17.39	0.915	0.628	0.0526214	4.4e-06	0.0361278	3.5e-06		0.0741198	0.1529	0.0608986	0.153869
MTUR1 152	17.22	0.906	0.622	0.0526126	4.4e-06	0.0361212	2.9e-06		-0.0541666	0.161678	-0.0152263	0.152312
MTUR1 153	17.22	0.906	0.622	0.0526095	5.8e-06	0.0361157	3.1e-06		0.016157	0.165753	-0.0747541	0.140798
MTUR1 154	17.26	0.908	0.623	0.0526047	4.8e-06	0.0361156	2.8e-06		-0.18341	0.170739	-0.150882	0.14402
MTUR1 155	17.42	0.917	0.629	0.0526192	4.9e-06	0.0361264	3.1e-06		0.186278	0.149974	0.150882	0.13477
MTUR1 156	17.25	0.908	0.623	0.0526141	3.9e-06	0.0361263	2.5e-06		-0.0978729	0.145459	0.0110724	0.143167
MTUR1 157	17.43	0.917	0.63	0.0526193	4.4e-06	0.0361254	3.3e-06		0.142554	0.138446	0.0429079	0.143174
MTUR1 158	17.31	0.911	0.625	0.0526095	4.3e-06	0.0361214	3.1e-06		-0.019958	0.153118	0.0802913	0.158442
MTUR1 159	17.01	0.895	0.614	0.0526018	5.2e-06	0.0361116	3.5e-06		-0.200523	0.154168	-0.246397	0.15687
MTUR1 160	17.31	0.911	0.625	0.0526152	4.5e-06	0.0361196	3.2e-06		0.118801	0.168567	0.0207648	0.161556
MTUR1 161	17.43	0.917	0.63	0.0526161	5.6e-06	0.0361261	3.4e-06		0.0294595	0.168554	0.0733595	0.156692
MTUR1 162	14.2	0.756	0.525	0.0532321	4.5e-06	0.036991	4.1e-06		-0.0150283	0.145395	-0.022978	0.209735
MTUR1 163	14.51	0.772	0.5368	0.0532273	5.3e-06	0.0369888	5.7e-06		-0.015969	0.146237	0.0364989	0.210911
MTUR1 164	14.03	0.747	0.519	0.0532242	3.5e-06	0.0369839	3.4e-06		-0.0140911	0.133619	0.0392078	0.205454
MTUR1 165	14.12	0.752	0.522	0.0532331	3.5e-06	0.0369884	2.9e-06		0.00563562	0.123739	-0.127051	0.137473
MTUR1 166	14.07	0.749	0.521	0.0532285	3.3e-06	0.0369851	3.1e-06		0.056364	0.131721	0.21635	0.159606
MTUR1 167	13.95	0.743	0.516	0.0532275	3.7e-06	0.0369848	3.6e-06		0.102401	0.142276	0.271807	0.171064
MTUR1 168	14.01	0.746	0.518	0.0532262	4.2e-06	0.0369837	3.2e-06		-0.0206661	0.125032	-0.017575	0.157869
MTUR1 169	14.92	0.794	0.552	0.0532271	3.6e-06	0.0369839	3.3e-06		-0.0713871	0.121984	-0.0689442	0.154587
MTUR1 170	15.06	0.802	0.557	0.0532356	3.4e-06	0.0369892	3.4e-06		0.224524	0.156532	0.170349	0.188225
MTUR1 171	12.68	0.675	0.4689	0.0532202	6.7e-06	0.0369819	5.1e-06		-0.175654	0.158194	-0.0797624	0.196441
MTUR1 172	13.11	0.698	0.485	0.0532235	3.8e-06	0.0369805	3.9e-06		0.0366393	0.157451	0.0365071	0.201745
MTUR1 173	13.54	0.721	0.501	0.0532229	3.3e-06	0.0369764	3.8e-06		-0.0225462	0.119629	-0.095998	0.1736
MTUR1 174	12.27	0.653	0.454	0.0532247	3.9e-06	0.0369794	3.4e-06		-0.0272422	0.114267	-0.0689526	0.16424
MTUR1 175	13.46	0.717	0.498	0.0532294	3.3e-06	0.0369875	3.3e-06		0.038514	0.131697	0.198755	0.160904
MTUR1 176	11.14	0.593	0.412	0.05323	4.8e-06	0.0369809	3.6e-06		0.0779696	0.138289	0.0270417	0.167333
MTUR1 177	13.56	0.722	0.501	0.05323	3.4e-06	0.0369851	3.2e-06		0.0197261	0.135551	0.116277	0.170782
MTUR1 178	15.55	0.828	0.575	0.0532356	4.5e-06	0.0369893	3.9e-06		0.0507205	0.125691	0.0378502	0.161513
MTUR1 179	13.87	0.739	0.513	0.0532358	3.6e-06	0.0369907	3.2e-06		0.0638709	0.130715	0.112203	0.170756
MTUR1 180	13.15	0.7	0.486	0.0532292	3.9e-06	0.0369838	3.8e-06		-0.0469645	0.130723	-0.0608337	0.17077
MTUR1 181	13.37	0.711	0.494	0.0532276	4.5e-06	0.0369814	3.9e-06		0.01503	0.131713	-0.058134	0.175028
MTUR1 182	13.18	0.701	0.487	0.0532244	3.7e-06	0.0369833	3.5e-06		-0.0648157	0.127686	0.00135196	0.170391
MTUR1 183	13.31	0.708	0.492	0.0532281	3.5e-06	0.0369851	3.5e-06		0	0.136744	-0.0459623	0.172061
MTUR1 184	12.9	0.687	0.477	0.0532318	5.2e-06	0.0369903	4e-06		0.0572999	0.135795	0.152766	0.17985
MTUR1 185	13.82	0.735	0.511	0.0532294	3.6e-06	0.0369842	4e-06		-0.017847	0.141597	-0.139229	0.179846
MTUR1 186	11.85	0.631	0.438	0.0532289	4.1e-06	0.0369884	3.5e-06		-0.0526002	0.140304	0.106802	0.170594
MTUR1 187	14.59	0.776	0.539	0.053234	5.1e-06	0.0369847	3.4e-06		0.0563581	0.13853	-0.114899	0.17231
MTUR1 188	13.65	0.727	0.505	0.0532331	3.4e-06	0.0369895	4.1e-06		0.034754	0.132594	0.168995	0.173819
MTUR1 189	15.26	0.813	0.5647	0.053239	4.8e-06	0.0369971	4e-06		0.14747	0.139993	0.231153	0.166557
MTUR1 190	16.02	0.853	0.593	0.0532338	4.5e-06	0.0369953	3e-06		0	0.137436	0.0959673	0.164984
MTUR1 191	13.37	0.712	0.494	0.0532286	3.2e-06	0.0369864	3.5e-06		-0.0291188	0.125924	-0.121652	0.15171
MTUR1 192	13.31	0.709	0.492	0.0532265	3.8e-06	0.0369865	3.2e-06		-0.1052	0.1175	-0.0689393	0.150286
MTUR1 193	14.87	0.792	0.55	0.0532356	3.8e-06	0.0369917	2.9e-06		0.101446	0.122569	0.0635318	0.142156
MTUR1 194	14.78	0.787	0.547	0.0532339	3.7e-06	0.0369922	3e-06		-0.0957944	0.125921	-0.0946056	0.138914
MTUR1 195	15.02	0.8	0.556	0.0532424	4.1e-06	0.0369997	3e-06		0.109887	0.1412	0.182467	0.153956
MTUR1 196	16.08	0.856	0.595	0.0532392	5.1e-06	0.0369937	3.8e-06		-0.0216002	0.154683	-0.0756828	0.163082
MTUR1 197	15.79	0.841	0.584	0.0532383	5e-06	0.0369933	3.6e-06		0.0864114	0.155638	0.167626	0.17976
MTUR1 198	12.62	0.672	0.467	0.0532282	4.2e-06	0.0369805	4.1e-06		-0.131492	0.135786	-0.248718	0.17102
MTUR1 199	13	0.692	0.481	0.0532321	3.1e-06	0.0369861	3.2e-06		0.018786	0.120201	0.0351496	0.162344
MTUR1 200	13	0.692	0.481	0.053234	3.7e-06	0.0369891	3e-06		-0.0582301	0.114244	-0.100019	0.155125
MTUR1 201	12.8	0.682	0.474	0.053233	3.7e-06	0.036985	3.4e-06		-0.0929788	0.114244	-0.244634	0.165544
MTUR1 202	12.48	0.664	0.462	0.0532338	3.1e-06	0.0369886	3.5e-06		-0.0281768	0.112002	-0.0189244	0.156291
MTUR1 203	12.71	0.677	0.47	0.0532376	3.5e-06	0.0369936	3.1e-06		0.145595	0.110851	0.292028	0.156302
MTUR1 204	12.72	0.677	0.471	0.0532272	3.7e-06	0.0369824	3.4e-06		-0.0948673	0.12051	-0.231138	0.153795
MTUR1 205	12.81	0.682	0.474	0.0532325	3.9e-06	0.0369916	3.6e-06		0.0751477	0.122602	0.204142	0.1624
MTUR1 206	11.72	0.624	0.434	0.0532298	3.7e-06	0.0369857	3.4e-06		-0.0206647	0.125882	-0.0973254	0.162394
MTUR1 207	12.83	0.683	0.475	0.0532293	4e-06	0.036987	3.4e-06		-0.0291185	0.120657	0.0784121	0.164043
MTUR1 208	12.67	0.675	0.469	0.0532319	3.4e-06	0.0369825	3.7e-06		0.170979	0.142857	0.13116	0.162567
MTUR1 209	12.75	0.679	0.472	0.0532336	3.8e-06	0.0369867	3.4e-06		0.0836008	0.147334	0.0878771	0.159271
MTUR1 210	13.92	0.741	0.515	0.053242	4.1e-06	0.0369986	3.5e-06		0.10707	0.123885	0.183825	0.154836
MTUR1 211	13.4	0.713	0.496	0.053239	3.5e-06	0.0369969	3e-06		0.0507173	0.120728	0.109481	0.153246
MTUR1 212	12.73	0.678	0.471	0.0532306	3.5e-06	0.0369871	3.3e-06		-0.059173	0.117225	-0.106783	0.160171
MTUR1 213	12.47	0.664	0.461	0.0532285	3.8e-06	0.0369852	3.9e-06		-0.137126	0.126265	-0.237876	0.160166
MTUR1 214	13.57	0.723	0.502	0.053234	3.9e-06	0.0369934	3.4e-06		-0.0591692	0.131368	-0.0324372	0.150019
MTUR1 215	12.45	0.663	0.46	0.0532333	3.9e-06	0.0369883	3.2e-06		0.016907	0.122711	-0.0729907	0.151512
MTUR1 216	12.35	0.658	0.457	0.0532308	3.5e-06	0.0369886	3.1e-06		0.0347555	0.118384	0.066241	0.146746
MTUR1 217	11.53	0.614	0.426	0.0532246	3.5e-06	0.036984	3.1e-06		-0.221653	0.111755	-0.258153	0.142104
MTUR1 218	12.26	0.653	0.454	0.0532357	3.3e-06	0.0369871	3.3e-06		-0.00281765	0.114247	-0.174355	0.151847
MTUR1 219	12.28	0.654	0.454	0.0532297	3.9e-06	0.0369886	3.5e-06		0.008454	0.12425	0.147364	0.154731
MTUR1 220	11.05	0.588	0.409	0.0532228	4.2e-06	0.0369792	3.1e-06		-0.150289	0.126169	-0.208182	0.150202
MTUR1 221	12.82	0.683	0.474	0.0532319	3.5e-06	0.0369852	3e-06		0.177557	0.120961	0.175777	0.150219
MTUR1 222	11.66	0.62	0.431	0.0532221	3.4e-06	0.0369782	3.5e-06		-0.148413	0.118539	-0.127086	0.159839
MTUR1 223	11.1	0.591	0.41	0.0532281	4e-06	0.0369806	3.7e-06		-0.0582365	0.154048	-0.181143	0.181972
MTUR1 224	15.23	0.8111	0.5636	0.0532403	6.3e-06	0.0369964	4.4e-06		0.110831	0.158163	0.23927	0.179198
MTUR1 225	13.8	0.735	0.51	0.0532407	3.9e-06	0.0369945	3.3e-06		0.0159655	0.160909	-0.10541	0.174773
MTUR1 226	14.13	0.752	0.523	0.0532394	4.3e-06	0.0370004	3.4e-06		0.043203	0.126367	0.214909	0.151587
MTUR1 227	12.35	0.657	0.457	0.0532335	3.4e-06	0.0369904	3e-06		-0.0216025	0.119234	-0.100016	0.156507
MTUR1 228	11.79	0.627	0.436	0.0532299	3.2e-06	0.0369878	3.6e-06		-0.0676266	0.107407	-0.113538	0.153405
MTUR1 229	12.26	0.652	0.453	0.0532335	3.3e-06	0.0369936	3.2e-06		0.0911163	0.107411	0.144641	0.151995
MTUR1 230	12.32	0.656	0.456	0.0532274	3.4e-06	0.0369887	2.9e-06		-0.0666905	0.115289	-0.0283862	0.148593
MTUR1 231	11.85	0.631	0.438	0.0532284	3.9e-06	0.0369859	3.4e-06		-0.0591754	0.146009	-0.173009	0.179276
MTUR1 232	11.64	0.62	0.431	0.0532357	5.8e-06	0.0369959	4.9e-06		0.0460239	0.150349	0.183838	0.195645
MTUR1 233	13.67	0.728	0.506	0.0532381	3.9e-06	0.0369923	4.1e-06		0.0403862	0.142871	-0.0391958	0.195638
MTUR1 234	12.33	0.656	0.456	0.0532362	3e-06	0.0369916	3.4e-06		-0.072314	0.119106	-0.0513604	0.162667
MTUR1 235	13.76	0.733	0.509	0.053242	4e-06	0.0369947	2.8e-06		0.13525	0.114642	0.117598	0.148781
MTUR1 236	12.11	0.645	0.448	0.0532334	3.5e-06	0.0369891	3.3e-06		-0.103308	0.121646	-0.104074	0.145504
MTUR1 237	12.17	0.648	0.45	0.0532358	3.7e-06	0.0369912	3.2e-06		0.0347523	0.118255	0.0865145	0.157849
MTUR1 238	20.4	1.072	0.735	0.0525348	3.1e-06	0.0360442	3.1e-06		-0.279736	0.102187	-0.130378	0.139732
MTUR1 239	20.52	1.078	0.74	0.0525517	3.1e-06	0.0360549	2.6e-06		0.154158	0.109173	0.137309	0.133406
MTUR1 240	20.31	1.068	0.732	0.0525524	3.7e-06	0.0360557	2.6e-06		-0.0713523	0.109157	-0.0429872	0.131612
MTUR1 241	20.08	1.056	0.724	0.0525606	3.1e-06	0.0360596	3e-06		0.0979917	0.111256	0.00970625	0.124549
MTUR1 242	20.35	1.07	0.734	0.0525585	3.3e-06	0.0360628	2.1e-06		-0.0808557	0.107725	-0.0360469	0.12295
MTUR1 243	20.64	1.085	0.745	0.0525649	3.4e-06	0.0360686	2.5e-06		0.0751508	0.106693	0.124778	0.112354
MTUR1 244	20.32	1.068	0.733	0.0525634	3e-06	0.0360654	2.4e-06		0.041856	0.1045	0.0388199	0.118487
MTUR1 245	20.16	1.059	0.727	0.0525575	3.1e-06	0.0360594	2.5e-06		-0.126512	0.106897	-0.191314	0.121816
MTUR1 246	20.1	1.057	0.725	0.0525649	3.6e-06	0.0360672	2.7e-06		0.156973	0.110055	0.242662	0.123361
MTUR1 247	20.18	1.061	0.728	0.0525558	3.3e-06	0.0360575	2.5e-06		-0.136027	0.114312	-0.239837	0.133415
MTUR1 248	20.99	1.103	0.757	0.052561	3.5e-06	0.0360651	3.1e-06		-0.0646826	0.114306	0.00138638	0.134984
MTUR1 249	20.52	1.079	0.74	0.052573	3.6e-06	0.0360726	2.8e-06		0.111286	0.114294	0.0568331	0.13089
MTUR1 250	20.53	1.079	0.74	0.0525733	3.3e-06	0.036076	2.2e-06		0.0941631	0.110033	0.130297	0.125578
MTUR1 251	20.48	1.077	0.739	0.0525637	3.1e-06	0.03607	2.8e-06		-0.126497	0.112444	-0.0803928	0.122232
MTUR1 252	20.53	1.079	0.74	0.0525674	3.8e-06	0.0360698	2.6e-06		0.0237796	0.113521	-0.0221787	0.126591
MTUR1 253	20.55	1.08	0.741	0.0525686	3.4e-06	0.0360712	2.5e-06		0.042803	0.115542	0.0970397	0.124916
MTUR1 254	20.52	1.079	0.74	0.0525653	3.3e-06	0.0360656	2.7e-06		-0.0789432	0.112058	-0.144161	0.126535
MTUR1 255	21.07	1.108	0.76	0.0525703	3.5e-06	0.0360704	2.7e-06		0.0970224	0.113169	0.0499049	0.139918
MTUR1 256	20.97	1.102	0.756	0.0525651	3.5e-06	0.0360716	3.3e-06		-0.124592	0.128537	0.0401994	0.149475
MTUR1 257	19.6	1.03	0.707	0.052573	4.6e-06	0.0360699	3.3e-06		0.144582	0.12854	-0.0568309	0.14424
MTUR1 258	20.91	1.099	0.754	0.0525657	3.5e-06	0.0360723	2.3e-06		-0.147413	0.128534	0.00693057	0.134304
MTUR1 259	20.91	1.099	0.754	0.0525739	3.5e-06	0.0360742	2.7e-06		0.0998694	0.114228	0.0180187	0.121909
MTUR1 260	20.96	1.102	0.756	0.0525716	3.4e-06	0.0360748	2.6e-06		-0.0047554	0.127559	0.0984163	0.128063
MTUR1 261	21.73	1.142	0.784	0.0525698	4.6e-06	0.0360683	2.7e-06		-0.100808	0.123756	-0.252235	0.128056
MTUR1 262	21.16	1.113	0.763	0.0525786	3.1e-06	0.03608	2.7e-06		0.160738	0.120873	0.188506	0.128052
MTUR1 263	21.22	1.115	0.765	0.0525705	3.1e-06	0.0360781	2.6e-06		-0.123628	0.0999799	-0.051275	0.123363
MTUR1 264	20.73	1.09	0.748	0.0525754	2.9e-06	0.0360799	2.4e-06		0.00380407	0.0918326	-0.0457297	0.118498
MTUR1 265	20.8	1.094	0.751	0.0525799	2.3e-06	0.036085	2.4e-06		-0.0513478	0.0906097	-0.0443378	0.115195
MTUR1 266	20.59	1.082	0.743	0.0525748	3.3e-06	0.0360777	3.7e-06		-0.105553	0.103301	-0.284028	0.147824
MTUR1 267	21.14	1.111	0.763	0.0525709	3.1e-06	0.0360826	3e-06		0.0408988	0.102279	0.259195	0.145433
MTUR1 268	20.44	1.074	0.737	0.0525627	2.9e-06	0.0360688	2.2e-06		0.00190249	0.102294	-0.126132	0.121245
MTUR1 269	20.52	1.079	0.74	0.0525543	3.3e-06	0.0360641	2.3e-06		-0.153151	0.103408	-0.12892	0.107275
MTUR1 270	20.64	1.085	0.744	0.052562	3.2e-06	0.0360687	2.2e-06		-0.0142687	0.103403	-0.0304964	0.117523
MTUR1 271	20.48	1.077	0.739	0.0525712	2.9e-06	0.0360755	2.8e-06		0.176934	0.0989621	0.194075	0.125582
MTUR1 272	20.53	1.079	0.741	0.0525618	2.9e-06	0.0360683	2.8e-06		-0.0370978	0.100148	-0.0734663	0.13773
MTUR1 273	21.32	1.121	0.769	0.0525563	3.3e-06	0.0360664	3e-06		-0.250145	0.105681	-0.167718	0.130422
MTUR1 274	20.82	1.095	0.751	0.0525771	3.4e-06	0.0360766	2.3e-06		0.227337	0.112055	0.153863	0.127191
MTUR1 275	21.11	1.11	0.761	0.052574	3.5e-06	0.0360757	2.6e-06		-0.0475498	0.109956	-0.0651366	0.125377
MTUR1 276	21	1.104	0.758	0.0525759	3.1e-06	0.0360795	2.9e-06		0.0504059	0.111089	0.0249455	0.131356
MTUR1 277	21.53	1.132	0.777	0.0525725	3.5e-06	0.0360815	2.7e-06		-0.092245	0.109956	-0.0194001	0.134466
MTUR1 278	21.04	1.106	0.759	0.0525788	3.4e-06	0.0360849	2.8e-06		0.172152	0.115342	0.182935	0.139603
MTUR1 279	20.97	1.102	0.756	0.052567	3.6e-06	0.0360751	3.2e-06		-0.263404	0.112139	-0.272967	0.138133
MTUR1 280	21.12	1.11	0.762	0.0525829	3.2e-06	0.036085	2.6e-06		0.136945	0.109986	0.126107	0.136595
MTUR1 281	21.23	1.117	0.766	0.0525844	3.2e-06	0.0360858	2.7e-06		0.118871	0.105412	0.0789847	0.124863
MTUR1 282	21.05	1.107	0.759	0.0525734	3.2e-06	0.0360809	2.5e-06		-0.199681	0.10652	-0.152412	0.121747
MTUR1 283	21.06	1.107	0.76	0.0525834	3.3e-06	0.036087	2.4e-06		0.140749	0.104398	0.0942256	0.123468
MTUR1 284	21.02	1.105	0.758	0.0525786	3e-06	0.0360863	2.8e-06		-0.0789232	0.0991499	-0.0581904	0.123459
MTUR1 285	21.36	1.123	0.771	0.0525821	2.7e-06	0.0360898	2.5e-06		0.140752	0.093429	0.167666	0.123465
MTUR1 286	21.07	1.108	0.76	0.0525708	2.8e-06	0.0360812	2.4e-06		-0.153103	0.0970211	-0.17319	0.12006
MTUR1 287	21.09	1.109	0.761	0.0525756	3.3e-06	0.0360851	2.6e-06		-0.0171179	0.114702	0.0484988	0.150084
MTUR1 288	21.24	1.117	0.766	0.0525822	4.2e-06	0.0360855	4.1e-06		0.0684689	0.121451	-0.0609626	0.159621
MTUR1 289	21.51	1.131	0.776	0.0525816	3.5e-06	0.0360903	3.1e-06		-0.0313788	0.123454	0.0471063	0.154929
MTUR1 290	20.98	1.103	0.757	0.0525843	3.5e-06	0.0360917	2.2e-06		0.0237719	0.113134	0.0249371	0.132477
MTUR1 291	20.89	1.098	0.754	0.0525845	3.3e-06	0.0360913	2.9e-06		0.0313791	0.103098	-0.0110829	0.130695
MTUR1 292	21.16	1.113	0.764	0.0525814	2.5e-06	0.0360917	3e-06		-0.104589	0.0950457	-0.0581817	0.134768
MTUR1 293	21.04	1.107	0.76	0.0525893	2.8e-06	0.0360963	2.5e-06		0.0817724	0.0902016	0.00831117	0.131529
MTUR1 294	21.02	1.105	0.759	0.0525886	2.9e-06	0.0361003	2.7e-06		0.03518	0.104052	0.0983468	0.123236
MTUR1 295	11.43	0.603	0.4153	0.0527705	5.1e-06	0.036338	4.4e-06		0.0151602	0.187407	0.196802	0.238683
MTUR1 296	11.82	0.624	0.43	0.0527762	4.1e-06	0.0363389	3.5e-06		-0.00189479	0.134663	-0.229729	0.173385
MTUR1 297	11.94	0.63	0.434	0.0527746	3.9e-06	0.0363442	3.9e-06		-0.0397903	0.13938	0.140345	0.173401
MTUR1 298	12.03	0.635	0.437	0.0527772	4.7e-06	0.0363393	3.5e-06		0.0454763	0.149558	-0.0577853	0.19007
MTUR1 299	12.42	0.655	0.451	0.052775	5e-06	0.0363386	4.5e-06		-0.0322112	0.159771	-0.0853015	0.187018
MTUR1 300	12.44	0.657	0.452	0.0527762	4.9e-06	0.0363441	3.7e-06		-0.0113686	0.168688	0.0742954	0.194454
MTUR1 301	12.47	0.658	0.453	0.0527786	5.5e-06	0.0363442	4e-06		0.0852691	0.162578	0.0715434	0.175282
MTUR1 302	11.83	0.624	0.43	0.052772	4.4e-06	0.0363391	3.3e-06		-0.160097	0.16932	-0.0811732	0.183623
MTUR1 303	12.69	0.67	0.461	0.0527823	5.5e-06	0.0363399	4.2e-06		0.143061	0.160438	-0.00825532	0.172772
MTUR1 304	11.73	0.619	0.426	0.0527775	4.7e-06	0.0363413	3.3e-06		-0.0227364	0.16881	-0.0729145	0.174222
MTUR1 305	12.57	0.663	0.4569	0.0527751	5.2e-06	0.036348	3.4e-06		-0.0691566	0.1665	0.206381	0.160466
MTUR1 306	11.47	0.606	0.417	0.05278	5.3e-06	0.0363397	3.4e-06		0.077687	0.190769	-0.182962	0.1812
MTUR1 307	12.33	0.651	0.4483	0.0527767	6.8e-06	0.0363447	4.5e-06		-0.0435779	0.199019	0.0797979	0.185602
MTUR1 308	12.07	0.637	0.439	0.052778	6e-06	0.0363439	3.7e-06		0.0407383	0.194415	0.0467776	0.185602
MTUR1 309	11.55	0.609	0.42	0.052775	4.8e-06	0.0363397	3.4e-06		-0.0757877	0.174737	-0.101807	0.170089
MTUR1 310	11.62	0.614	0.422	0.05278	5.1e-06	0.0363429	3.6e-06		0.100427	0.154735	0.0839299	0.201611
MTUR1 311	12.14	0.641	0.441	0.0527744	4.2e-06	0.03634	5.4e-06		-0.0634737	0.150404	-0.0426509	0.209783
MTUR1 312	11.52	0.608	0.419	0.0527755	4.4e-06	0.0363402	4e-06		-0.0416843	0.138991	0.0165109	0.212442
MTUR1 313	11.56	0.61	0.42	0.052781	4.1e-06	0.0363392	3.8e-06		0.101373	0.146987	-0.060537	0.174145
MTUR1 314	11.61	0.613	0.422	0.0527758	4.9e-06	0.0363426	3.1e-06		-0.10894	0.170003	-0.0577801	0.172401
MTUR1 315	13.06	0.69	0.475	0.0527821	6.3e-06	0.0363502	3.9e-06		0.15538	0.189192	0.152705	0.170733
MTUR1 316	12.52	0.661	0.4549	0.052772	6e-06	0.0363467	3.7e-06		0.00568487	0.194032	0.198132	0.184383
MTUR1 317	11.53	0.608	0.419	0.0527784	4.8e-06	0.0363424	3.9e-06		0.10801	0.18542	0.147233	0.192335
MTUR1 318	11.95	0.631	0.4342	0.0527841	6.6e-06	0.0363453	4.2e-06		0.0909447	0.179378	0.0976838	0.190753
MTUR1 319	11.64	0.614	0.423	0.0527802	4.8e-06	0.0363411	3.9e-06		-0.00568392	0.183338	-0.0495282	0.193905
MTUR1 320	11.48	0.606	0.417	0.0527769	5.2e-06	0.0363405	4.1e-06		0.00852653	0.165281	0.0137589	0.178886
MTUR1 321	11.57	0.611	0.421	0.0527727	5.1e-06	0.0363389	3.2e-06		-0.105157	0.16957	-0.0550344	0.189252
MTUR1 322	12.47	0.658	0.4532	0.0527796	5.2e-06	0.0363413	4.5e-06		0.0653704	0.162221	0.00963101	0.186019
MTUR1 323	11.52	0.608	0.419	0.0527796	4.5e-06	0.036343	3.9e-06		-0.0161044	0.166837	-0.0275149	0.192902
MTUR1 324	11.71	0.618	0.426	0.0527813	5.5e-06	0.0363467	3.7e-06		0.0691581	0.160389	0.125199	0.179567
MTUR1 325	11.31	0.597	0.411	0.0527757	4.6e-06	0.0363413	3.7e-06		-0.088101	0.167816	-0.0935487	0.174759
MTUR1 326	11.43	0.603	0.415	0.0527794	5.2e-06	0.0363427	3.6e-06		0.0776879	0.152772	0.0398996	0.17162
MTUR1 327	11.47	0.605	0.417	0.0527749	4.1e-06	0.0363412	3.5e-06		-0.0274744	0.159535	0.0123828	0.180129
MTUR1 328	11.49	0.607	0.418	0.0527733	5.2e-06	0.0363388	4.2e-06		-0.0672643	0.164324	-0.141702	0.178624
MTUR1 329	12.03	0.635	0.437	0.0527788	5.6e-06	0.0363467	3.5e-06		-0.0511543	0.168028	-0.174676	0.186357
MTUR1 330	14.58	0.77	0.53	0.0528001	4.6e-06	0.0363806	3.9e-06		0.18564	0.145314	0.0247391	0.182562
MTUR1 331	15.25	0.805	0.555	0.0528029	4.9e-06	0.0363887	3.7e-06		-0.0624927	0.160923	0.0137407	0.18918
MTUR1 332	15.09	0.797	0.5492	0.0528123	5.2e-06	0.0363958	4.3e-06		0.125933	0.158898	0.164881	0.183159
MTUR1 333	14.78	0.781	0.538	0.0528084	4.4e-06	0.0363909	3.5e-06		0.0549185	0.175711	0.0192359	0.201525
MTUR1 334	15.53	0.82	0.5649	0.0527987	6.3e-06	0.0363846	4.8e-06		-0.108892	0.194334	-0.130533	0.190898
MTUR1 335	15.17	0.801	0.5519	0.0528005	6.8e-06	0.0363878	3.6e-06		0.0643975	0.20512	0.221277	0.204509
MTUR1 336	13.69	0.7228	0.498	0.0527955	5.6e-06	0.0363749	4.4e-06		-0.0179936	0.187357	-0.262475	0.187962
MTUR1 337	14.67	0.775	0.534	0.0527924	4.5e-06	0.0363811	3.8e-06		-0.0587171	0.16158	0.0824672	0.197152
MTUR1 338	14.76	0.779	0.537	0.0527955	4.6e-06	0.0363813	4.2e-06		0.0700866	0.141558	0.123705	0.190607
MTUR1 339	14.81	0.782	0.539	0.0527912	3.8e-06	0.0363725	4e-06		-0.0662945	0.140424	-0.243257	0.193674
MTUR1 340	14.64	0.773	0.533	0.0527939	4.4e-06	0.0363814	4e-06		0.0407261	0.156899	0.169071	0.178662
MTUR1 341	14.35	0.757	0.522	0.0527923	5.9e-06	0.036378	3.2e-06		0.021784	0.166446	-0.0219908	0.169004
MTUR1 342	14.17	0.748	0.515	0.0527884	4.8e-06	0.0363762	3.4e-06		0.126938	0.168394	0.0989756	0.163784
MTUR1 343	14.83	0.783	0.539	0.0528001	4.3e-06	0.0363848	3.9e-06		0.0700805	0.162646	-0.00412258	0.187333
MTUR1 344	15.91	0.84	0.579	0.0528013	5e-06	0.0363911	4.1e-06		-0.0104163	0.156735	0.0975608	0.181417
MTUR1 345	15.17	0.801	0.552	0.0528036	5e-06	0.0363903	3.4e-06		-0.0104158	0.154795	0.0370992	0.184714
MTUR1 346	14.98	0.791	0.545	0.052807	4.1e-06	0.0363868	4.1e-06		0.039769	0.150276	-0.078319	0.176672
MTUR1 347	14.91	0.787	0.542	0.0528062	4.6e-06	0.036389	3.6e-06		-0.0227241	0.164194	0.122305	0.184322
MTUR1 348	15.88	0.839	0.5777	0.0528078	6.1e-06	0.0363823	3.9e-06		0.0388215	0.187525	-0.241817	0.204191
MTUR1 349	15.71	0.829	0.5716	0.0528053	6.3e-06	0.0363932	5.2e-06		0.0359825	0.181751	0.285849	0.202881
MTUR1 350	14.84	0.784	0.54	0.052799	3.9e-06	0.0363833	3.5e-06		-0.124987	0.166168	-0.214338	0.20287
MTUR1 351	14.62	0.772	0.532	0.0528059	4.7e-06	0.036389	3.9e-06		-0.131597	0.138244	-0.0329759	0.17628
MTUR1 352	9.69	0.512	0.353	0.0527998	4.1e-06	0.0363823	3.5e-06		0.0975478	0.133004	0.149821	0.183234
MTUR1 353	9.4	0.496	0.342	0.0527964	3.5e-06	0.0363693	4.3e-06		0.0132587	0.135465	-0.140208	0.198073
MTUR1 354	9.05	0.478	0.329	0.0527916	4.7e-06	0.0363665	4.6e-06		-0.0322011	0.141116	0.015124	0.209672
MTUR1 355	8.79	0.464	0.32	0.0527902	4.6e-06	0.0363626	4.3e-06		0.0236792	0.157651	-0.0247501	0.219418
MTUR1 356	8.81	0.465	0.32	0.0527863	5.1e-06	0.0363605	4.9e-06		-0.15816	0.153493	-0.273574	0.211771
MTUR1 357	8.73	0.461	0.318	0.0527991	4.3e-06	0.0363783	4.1e-06		0.143015	0.149317	0.237836	0.202996
MTUR1 358	8.81	0.465	0.3203	0.0527968	4.2e-06	0.0363788	3.7e-06		0.0464065	0.137815	-0.00549768	0.182731
MTUR1 359	8.81	0.465	0.321	0.0527896	4.1e-06	0.0363797	3.7e-06		-0.121221	0.138946	0.116837	0.176172
MTUR1 360	8.52	0.45	0.31	0.0527952	4.4e-06	0.0363721	3.7e-06		0.013259	0.135771	-0.280356	0.165802
MTUR1 361	8.86	0.468	0.322	0.0527994	3.9e-06	0.0363849	3e-06		0.0085229	0.146179	0.147061	0.159284
MTUR1 362	8.93	0.471	0.325	0.0528027	5e-06	0.036387	3.3e-06		0.0189388	0.150618	-0.00412233	0.161022
MTUR1 363	8.73	0.461	0.318	0.052804	4.8e-06	0.0363894	3.8e-06		0.0558701	0.155481	0.151166	0.17332
MTUR1 364	8.61	0.454	0.313	0.0527994	4.4e-06	0.0363808	3.8e-06		-0.0899551	0.147781	-0.222595	0.177771
MTUR1 365	8.63	0.456	0.314	0.0528043	4.3e-06	0.0363884	3.6e-06		-0.163786	0.141057	-0.00137406	0.171535
MTUR1 366	8.77	0.463	0.319	0.0528265	4.2e-06	0.0363961	3.4e-06		0.303917	0.139931	0.112662	0.159087
MTUR1 367	8.71	0.46	0.317	0.0528166	4.3e-06	0.0363956	3e-06		-0.029346	0.135658	0.166257	0.162572
MTUR1 368	8.48	0.448	0.309	0.0528098	3.9e-06	0.036383	3.8e-06		0.0918474	0.134586	-0.0893195	0.159503
MTUR1 369	8.41	0.444	0.3058	0.0527933	4.1e-06	0.0363769	3.2e-06		0.0274664	0.136952	0.163592	0.178859
MTUR1 370	17.49	0.923	0.6365	0.0528074	6.5e-06	0.0363975	5.4e-06		0.0359811	0.182064	0.190984	0.218574
MTUR1 371	16.21	0.856	0.59	0.0528114	4.7e-06	0.036396	4.6e-06		0.0908977	0.221318	0.0274763	0.230813
MTUR1 372	17.34	0.9157	0.6311	0.0528058	8.5e-06	0.0363925	4.5e-06		-0.0331392	0.201152	-0.0975381	0.208187
MTUR1 373	16.03	0.847	0.584	0.0528037	4.3e-06	0.0363961	4e-06		-0.0956281	0.193521	0.0480844	0.18483
MTUR1 374	14.61	0.771	0.532	0.0528117	3.7e-06	0.0363962	3e-06		0.0795342	0.143191	0.00549511	0.170901
MTUR1 375	15.1	0.797	0.549	0.0528113	5e-06	0.0363959	3.7e-06		0.0331379	0.13902	-0.0151114	0.160795
MTUR1 376	15	0.792	0.546	0.0528074	3.9e-06	0.0363967	3.4e-06		-0.00946828	0.150602	0.0549531	0.163684
MTUR1 377	14.41	0.761	0.525	0.0528045	4.8e-06	0.0363935	3.2e-06		0.0189381	0.17408	-0.0480832	0.21326
MTUR1 378	17.06	0.901	0.621	0.0527996	6.8e-06	0.0363938	6.2e-06		-0.0956355	0.205968	-0.118138	0.251042
MTUR1 379	16.64	0.879	0.6059	0.0528048	7e-06	0.0364027	5.9e-06		0.0378768	0.198339	0.254167	0.250093
MTUR1 380	15.84	0.837	0.577	0.0528164	5.5e-06	0.0363963	4.4e-06		0.105092	0.169811	-0.101648	0.166597
MTUR1 381	15	0.792	0.546	0.0528075	4.7e-06	0.0363939	2.9e-06		-0.0407123	0.1987	-0.0123646	0.201502
MTUR1 382	15.86	0.838	0.577	0.0528029	7.6e-06	0.0363924	5.1e-06		-0.157164	0.201736	-0.173083	0.199852
MTUR1 383	16.83	0.889	0.613	0.0528149	5.8e-06	0.0364035	4.3e-06		0.101307	0.205183	0.168968	0.206968
MTUR1 384	15.4	0.813	0.56	0.0528162	5.1e-06	0.0364023	3.5e-06		0.135393	0.176301	0.0741766	0.181606
MTUR1 385	15.6	0.824	0.568	0.0528032	5.2e-06	0.0363957	3.6e-06		-0.175148	0.175136	-0.201906	0.174658
MTUR1 386	15.86	0.838	0.577	0.0528087	5.7e-06	0.0364038	3.9e-06		-0.079526	0.181639	0.010988	0.194738
MTUR1 387	16.28	0.86	0.593	0.0528226	5.7e-06	0.0364111	4.7e-06		0.285944	0.219088	0.280213	0.225771
MTUR1 388	15.89	0.839	0.5782	0.0528063	8.3e-06	0.036398	5.5e-06		-0.146741	0.222921	-0.216998	0.24475
MTUR1 389	17.19	0.9079	0.6258	0.0528055	6.1e-06	0.0364007	5.2e-06		-0.0388202	0.22574	0.0535733	0.233925
MTUR1 390	14.06	0.743	0.512	0.0528088	6e-06	0.0363995	3.9e-06		-0.0350308	0.179665	-0.0535693	0.20281
MTUR1 391	14.3	0.755	0.521	0.0528158	4.1e-06	0.0364022	3.5e-06		0.0861559	0.158932	0.00274709	0.165877
MTUR1 392	14.5	0.766	0.528	0.0528137	4.2e-06	0.0364047	3e-06		-0.0823582	0.145983	0.00412036	0.155728
MTUR1 393	15.75	0.832	0.574	0.0528203	5e-06	0.0364069	3.3e-06		0.164737	0.169196	0.16071	0.160956
MTUR1 394	15.9	0.84	0.579	0.0528095	6.1e-06	0.0363974	3.8e-06		-0.11455	0.238199	-0.175806	0.278497
MTUR1 395	16.98	0.8967	0.618	0.0528108	9.8e-06	0.0364007	8.8e-06		0.0340851	0.235299	0.0604421	0.285343
MTUR1 396	15.75	0.832	0.573	0.0528085	4.6e-06	0.0363996	4e-06		-0.0255634	0.223482	-0.00274728	0.295287
MTUR1 397	15.6	0.824	0.568	0.0528089	4.7e-06	0.0363987	4.7e-06		-0.0710057	0.151967	-0.133229	0.194913
MTUR1 398	15.53	0.82	0.566	0.0528168	4.6e-06	0.0364075	3.5e-06		0.123082	0.147753	0.229401	0.184755
MTUR1 399	14.65	0.774	0.533	0.0528117	4.2e-06	0.0363996	3.3e-06		0.02651	0.151249	-0.0673039	0.18476
MTUR1 400	17.01	0.898	0.619	0.0528038	5e-06	0.0363966	4.7e-06		-0.147695	0.162895	-0.0219796	0.187696
MTUR1 401	14.01	0.74	0.51	0.0528115	5.6e-06	0.0363952	3.7e-06		0.0132549	0.167716	-0.162083	0.187689
MTUR1 402	15.59	0.823	0.567	0.0528065	7.5e-06	0.0363933	3.9e-06		-0.124022	0.190662	-0.263715	0.171702
MTUR1 403	15.05	0.795	0.548	0.0528083	4.8e-06	0.0364002	3.6e-06		-0.0142021	0.208764	0.119519	0.200338
MTUR1 404	17.06	0.901	0.621	0.0528116	6.5e-06	0.0363984	5e-06		0.0151484	0.180929	-0.0659326	0.196041
MTUR1 405	14.43	0.762	0.525	0.0528133	5.1e-06	0.0364014	3.6e-06		0.0142012	0.177241	-0.0453259	0.189475
MTUR1 406	14.65	0.774	0.534	0.0528135	4.4e-06	0.0364077	3.1e-06		0.00946737	0.150301	0.193678	0.150109
MTUR1 407	14.86	0.785	0.541	0.0528127	4.2e-06	0.0363999	2.7e-06		0.0539672	0.151533	-0.100265	0.155666
MTUR1 408	15.07	0.796	0.549	0.0528062	5.2e-06	0.0363994	3.9e-06		-0.0454471	0.165131	0.0178578	0.154193
MTUR1 409	13.61	0.719	0.4954	0.0528045	5.6e-06	0.0363976	3e-06		-0.168518	0.163336	-0.23897	0.159754
MTUR1 410	14.75	0.779	0.537	0.0528117	4.2e-06	0.0364051	2.6e-06		-0.114545	0.153971	-0.197735	0.168252
MTUR1 411	16.45	0.869	0.599	0.0528149	5.7e-06	0.0364114	4.6e-06		-0.0028401	0.159866	0.153822	0.17561
MTUR1 412	14.42	0.762	0.525	0.0528184	4.6e-06	0.0364065	3.6e-06		0.125919	0.162769	0.0412031	0.182941
MTUR1 413	13.98	0.738	0.509	0.0528086	4.5e-06	0.0363986	3.2e-06		-0.0151488	0.142485	-0.0755466	0.161968
MTUR1 414	14.18	0.749	0.516	0.0528004	3.9e-06	0.0363962	3.4e-06		-0.155278	0.139095	-0.0782987	0.158685
MTUR1 415	14.78	0.78	0.538	0.0528086	4.3e-06	0.0363995	3.4e-06		0.0785919	0.169313	0.0233525	0.17009
MTUR1 416	15.76	0.832	0.574	0.0528085	6.8e-06	0.0364011	3.9e-06		-0.0700596	0.172741	-0.0384589	0.165695
MTUR1 417	14.28	0.754	0.52	0.0528158	4.3e-06	0.0364055	3.1e-06		0.125925	0.178378	0.0398307	0.170465
MTUR1 418	15.05	0.795	0.548	0.0528098	4.9e-06	0.036407	3.7e-06		-0.125908	0.165216	0.00549348	0.168739
MTUR1 419	15.22	0.804	0.554	0.0528171	5.8e-06	0.0364081	3.8e-06		0.106984	0.16616	0.126361	0.16604
MTUR1 420	14.37	0.759	0.523	0.0528131	4.4e-06	0.0364	2.9e-06		0.0198818	0.158203	-0.0824108	0.16275

## Sheet: Table S2 Line scan
Table S2 Long term precision of line scan
Sample	28Si	29Si	30Si	29Si/28Si	2SE	30Si/28Si	2SE		δ29Si (‰)	2SE	δ30Si (‰)	2SE
MTUR1 01	17.03	0.896	0.6152	0.0526077	2.9e-06	0.0361213	2.2e-06		-0.0285121	0.0970367	0.0442972	0.104362
MTUR1 02	16.87	0.887	0.6092	0.0526042	3.3e-06	0.0361183	1.9e-06		-0.056076	0.101125	-0.0373758	0.0976887
MTUR1 03	17	0.894	0.6139	0.0526066	3e-06	0.036118	2e-06		-0.00760355	0.1001	0.0138437	0.0943402
MTUR1 04	16.96	0.892	0.6127	0.0526098	2.8e-06	0.0361167	2e-06		0.0503734	0.0989175	0.0138442	0.0992156
MTUR1 05	16.63	0.875	0.6008	0.0526077	3.2e-06	0.0361144	2.2e-06		-0.0161571	0.0967752	-0.0304578	0.104084
MTUR1 06	16.76	0.882	0.6052	0.0526073	2.8e-06	0.0361143	2.3e-06		0.0532274	0.0978384	0.0249215	0.104087
MTUR1 07	16.94	0.891	0.6119	0.0526013	2.9e-06	0.0361124	2e-06		-0.0855419	0.0922322	-0.0235371	0.100948
MTUR1 08	16.84	0.886	0.608	0.0526043	2.7e-06	0.0361122	2e-06		0.058934	0.0956408	0.0415389	0.102724
MTUR1 09	16.83	0.885	0.6076	0.0526035	2.9e-06	0.0361127	2.4e-06		0.00380204	0.0988165	0.0761563	0.112009
MTUR1 10	16.69	0.878	0.6028	0.0526055	3e-06	0.0361109	2.2e-06		0.030416	0.095523	-0.0179998	0.110387
MTUR1 11	16.86	0.887	0.6088	0.0526043	2.8e-06	0.0361104	2.3e-06		-0.0142572	0.102529	-0.0207692	0.107145
MTUR1 12	16.91	0.89	0.6107	0.0526046	3.5e-06	0.0361114	2.2e-06		-0.00760384	0.101484	-0.0443054	0.102646
MTUR1 13	17.09	0.899	0.6171	0.0526057	2.9e-06	0.0361156	1.9e-06		0.0313664	0.104588	0.0401505	0.0977022
MTUR1 14	17.07	0.898	0.6166	0.0526035	3.1e-06	0.0361169	2e-06		-0.0750844	0.0966673	-0.0207655	0.0994432
MTUR1 15	17.01	0.895	0.6145	0.0526092	2.8e-06	0.0361197	2.3e-06		0.0285129	0.0988806	0.0401459	0.110918
MTUR1 16	16.8	0.884	0.6067	0.0526119	3.1e-06	0.0361196	2.6e-06		0.0285115	0.10002	-0.00968994	0.112323
MTUR1 17	16.76	0.882	0.6055	0.0526116	3.2e-06	0.0361202	2.1e-06		0.0589258	0.104267	0.0664492	0.107835
MTUR1 18	16.84	0.886	0.6082	0.0526051	3.4e-06	0.0361196	2.2e-06		0.00190096	0.104484	0.0650659	0.104075
MTUR1 19	16.99	0.894	0.6137	0.0526049	2.9e-06	0.0361185	2.3e-06		-0.000950481	0.100248	0.0152279	0.105574
MTUR1 20	16.68	0.878	0.6025	0.0526048	2.8e-06	0.0361163	2.1e-06		-0.0123561	0.094399	-0.0179971	0.105578
MTUR1 21	16.73	0.88	0.6043	0.052606	2.9e-06	0.0361154	2.2e-06		0.0161581	0.0955212	0	0.105582
MTUR1 22	16.69	0.878	0.6028	0.0526055	3e-06	0.0361145	2.3e-06		-0.00475233	0.096593	-0.0138447	0.105584
MTUR1 23	16.52	0.869	0.5966	0.0526055	2.9e-06	0.0361146	2.1e-06		-0.0247116	0.0988107	0.00276897	0.0982496
MTUR1 24	18.82	0.99	0.68	0.0526119	3.2e-06	0.0361248	2.1e-06		-0.0807737	0.10652	-0.0442889	0.107456
MTUR1 25	18.78	0.988	0.6784	0.0526055	3.4e-06	0.0361215	2.1e-06		-0.0969386	0.105492	-0.0512134	0.100693
MTUR1 26	18.96	0.998	0.685	0.0526093	3e-06	0.0361219	2.1e-06		-0.0285113	0.104405	-0.0387561	0.0976013
MTUR1 27	19.35	1.018	0.699	0.0526161	3.1e-06	0.0361251	1.9e-06		0.0817307	0.100968	0.0484451	0.0975981
MTUR1 28	19.08	1.004	0.6893	0.0526143	3.1e-06	0.0361248	2.1e-06		-0.00190062	0.100966	0.0290667	0.100994
MTUR1 29	19	1	0.6864	0.0526127	3e-06	0.0361224	2.3e-06		0.0760331	0.106801	0.0470644	0.105565
MTUR1 30	18.52	0.974	0.669	0.0526031	3.6e-06	0.0361166	2.2e-06		-0.102645	0.111184	-0.0927465	0.107121
MTUR1 31	18.66	0.982	0.674	0.0526043	3.5e-06	0.0361175	2.2e-06		0.0104555	0.113185	-0.0235337	0.105502
MTUR1 32	18.8	0.989	0.6791	0.0526044	3.2e-06	0.0361201	2.2e-06		-0.0418198	0.112042	0.0069214	0.100929
MTUR1 33	18.5	0.973	0.6681	0.0526089	3.5e-06	0.0361222	1.9e-06		0.0218599	0.112037	0.0166106	0.102618
MTUR1 34	18.98	0.998	0.6855	0.0526111	3.5e-06	0.0361231	2.3e-06		0.0380162	0.111013	0.0304524	0.100998
MTUR1 35	19.04	1.002	0.6877	0.0526093	3.1e-06	0.0361218	2.1e-06		-0.0237595	0.10663	-0.0166102	0.107183
MTUR1 36	18.86	0.992	0.6811	0.05261	3.1e-06	0.0361217	2.3e-06		0.020909	0.105456	0.0290692	0.107187
MTUR1 37	18.72	0.985	0.6762	0.0526085	3.4e-06	0.0361195	2.3e-06		0.013306	0.109889	-0.0304535	0.108715
MTUR1 38	18.16	0.955	0.6558	0.0526056	3.5e-06	0.0361195	2.2e-06		-0.0332653	0.1079	-0.0138427	0.108717
MTUR1 39	18.75	0.986	0.677	0.0526062	2.9e-06	0.0361205	2.3e-06		-0.0114054	0.1079	-0.00415275	0.107116
MTUR1 40	18.45	0.971	0.6665	0.052608	3.4e-06	0.0361218	2.2e-06		-0.0408666	0.110278	-0.00692098	0.105563
MTUR1 41	18.65	0.981	0.6736	0.0526141	3.7e-06	0.0361236	2.1e-06		0.0940901	0.117493	0.0442943	0.107254
MTUR1 42	18.55	0.976	0.6701	0.0526103	3.6e-06	0.0361222	2.4e-06		-0.0313617	0.116457	0.0110736	0.108852
MTUR1 43	18.53	0.975	0.669	0.0526098	3.3e-06	0.03612	2.3e-06		0.0066528	0.110981	-0.0318373	0.107401
MTUR1 44	18.53	0.975	0.6693	0.0526086	3.2e-06	0.0361201	2e-06		0.0047521	0.107561	0.0498362	0.104073
MTUR1 45	18.47	0.972	0.667	0.0526069	3.3e-06	0.0361166	2.2e-06		0.0038018	0.112169	-0.0622943	0.102405
MTUR1 46	18.53	0.975	0.6693	0.0526048	3.7e-06	0.0361176	2.2e-06		-0.0541746	0.11115	-0.00692179	0.112261
MTUR1 47	18.72	0.985	0.676	0.0526084	3.1e-06	0.0361191	2.6e-06		0.025662	0.108033	0.0332245	0.112259
MTUR1 48	18.82	0.99	0.6799	0.0526093	3e-06	0.0361182	2.2e-06		0.0123554	0.104407	-0.022149	0.112258
MTUR1 49	18.68	0.983	0.6748	0.0526089	3.4e-06	0.0361189	2.2e-06		-0.00760322	0.108878	0.0152277	0.107123
MTUR1 50	18.43	0.97	0.6657	0.0526093	3.5e-06	0.0361185	2.3e-06		0.00570245	0.111971	-0.0207646	0.112052
MTUR1 51	18.25	0.96	0.6593	0.0526091	3.3e-06	0.0361196	2.5e-06		0.0142563	0.10878	0.0456837	0.110573
MTUR1 52	18.38	0.967	0.6639	0.0526074	3.1e-06	0.0361174	2.1e-06		-0.0133059	0.108782	-0.0761348	0.109
MTUR1 53	18.5	0.973	0.6682	0.0526071	3.5e-06	0.0361207	2.2e-06		-0.0684271	0.119462	0.0332231	0.122223
MTUR1 54	18.42	0.969	0.6651	0.0526087	2.7e-06	0.0361155	2.3e-06		-0.0247101	0.108362	-0.077523	0.104078
MTUR1 55	18.36	0.966	0.6631	0.0526058	3.6e-06	0.0361168	2.2e-06		-0.0342156	0.107211	0.00692203	0.105579
MTUR1 56	18.19	0.957	0.6571	0.0526065	3.4e-06	0.0361176	2.1e-06		-0.00665313	0.116375	-0.0152278	0.105574
MTUR1 57	18.08	0.951	0.6529	0.0526079	3.6e-06	0.0361195	2.3e-06		0.00190086	0.115265	0.0747575	0.11233
MTUR1 58	17.9	0.942	0.6466	0.0526091	3.5e-06	0.036116	2.6e-06		0.0380177	0.117439	-0.130119	0.112327
MTUR1 59	18.1	0.952	0.6538	0.0526063	3.6e-06	0.0361219	2.1e-06		-0.0503717	0.122025	0.139824	0.112328
MTUR1 60	18.1	0.952	0.6538	0.0526088	4e-06	0.0361177	2.3e-06		0.0351665	0.119013	-0.0622924	0.10886
MTUR1 61	18.21	0.958	0.6579	0.0526076	3.2e-06	0.036118	2.4e-06		-0.0152067	0.111892	-0.159175	0.108853
MTUR1 62	17.69	0.931	0.639	0.052608	2.9e-06	0.0361298	2.1e-06		-0.0228097	0.11189	0.150868	0.119315
MTUR1 63	18.12	0.953	0.6548	0.0526108	4e-06	0.0361307	2.9e-06		0.08364	0.108896	0.103801	0.11779
MTUR1 64	17.6	0.9256	0.6356	0.0526048	2.9e-06	0.0361241	2.3e-06		-0.0769832	0.119648	-0.116252	0.123633
MTUR1 65	17.95	0.9442	0.6484	0.0526069	3.9e-06	0.0361259	2.5e-06		-0.0237606	0.106618	0.0249135	0.112033
MTUR1 66	17.8	0.936	0.6429	0.0526115	2.8e-06	0.0361259	2.2e-06		0.0741338	0.111827	0.113505	0.108987
MTUR1 67	17.28	0.909	0.6241	0.0526083	3.4e-06	0.0361177	2.1e-06		-0.0142561	0.104615	-0.166096	0.102319
MTUR1 68	17.42	0.916	0.6291	0.0526066	3.3e-06	0.0361215	2.1e-06		-0.0218599	0.10763	-0.00553684	0.100696
MTUR1 69	17.5	0.921	0.632	0.0526104	3.1e-06	0.0361226	2.2e-06		0.0494223	0.109045	-0.0553639	0.10725
MTUR1 70	17.68	0.93	0.6386	0.0526084	3.7e-06	0.0361235	2.4e-06		-0.0180576	0.122879	0.0733648	0.117095
MTUR1 71	17.6	0.926	0.6355	0.0526083	4.3e-06	0.0361191	2.7e-06		0.0389688	0.127713	-0.0221485	0.118565
MTUR1 72	17.31	0.911	0.6253	0.0526041	3.6e-06	0.0361163	2.3e-06		-0.0494234	0.128772	-0.0401465	0.117043
MTUR1 73	17.19	0.904	0.621	0.0526051	3.8e-06	0.0361164	2.3e-06		-0.000950477	0.117629	-0.0622947	0.110298
MTUR1 74	17.31	0.911	0.6253	0.0526062	3.3e-06	0.036121	2.3e-06		-0.0313641	0.114401	0.0899835	0.10872
MTUR1 75	17.3	0.91	0.6247	0.0526106	3.3e-06	0.0361191	2.2e-06		0.0494221	0.106497	-0.06229	0.108714
MTUR1 76	17.4	0.915	0.6285	0.0526098	3.1e-06	0.0361217	2.3e-06		-0.00475194	0.10995	0.0761373	0.108717
MTUR1 77	17.16	0.903	0.6198	0.0526095	3.6e-06	0.0361188	2.3e-06		0.0180579	0.109952	-0.0567539	0.111912
MTUR1 78	17.25	0.907	0.6229	0.0526073	3.3e-06	0.03612	2.4e-06		-0.0370657	0.107005	0.0263019	0.108859
MTUR1 79	17.2	0.905	0.6213	0.052609	2.8e-06	0.0361193	2.1e-06		0.0408692	0.107008	0.0276868	0.112191
MTUR1 80	17.21	0.906	0.6218	0.0526057	3.4e-06	0.0361216	2.3e-06		-0.0380172	0.113115	0.0609091	0.113578
MTUR1 81	17.26	0.908	0.6234	0.052609	3.3e-06	0.0361222	2.3e-06		0.0484731	0.111974	0.0263003	0.113573
MTUR1 82	16.96	0.892	0.6128	0.0526072	3.5e-06	0.0361209	2.5e-06		-0.0237604	0.115358	-0.0332207	0.112044
MTUR1 83	17.09	0.8991	0.6173	0.0526079	3.7e-06	0.036122	2.2e-06		0.0104548	0.11747	-0.00830512	0.112043
MTUR1 84	17.18	0.904	0.6205	0.0526075	3.5e-06	0.0361237	2.3e-06		-0.0256611	0.117468	0.0719801	0.113775
MTUR1 85	17.17	0.903	0.6203	0.0526098	3.5e-06	0.0361202	2.6e-06		0.0779383	0.112039	-0.0456787	0.116834
MTUR1 86	17.25	0.908	0.6232	0.0526039	3.2e-06	0.03612	2.4e-06		-0.105494	0.115515	-0.0442948	0.12322
MTUR1 87	16.89	0.8888	0.6103	0.0526091	3.8e-06	0.036123	2.7e-06		0.0418196	0.114431	0.00830503	0.117091
MTUR1 88	16.75	0.881	0.6052	0.0526038	3.2e-06	0.0361197	2.3e-06		-0.0693818	0.114434	-0.0526001	0.110358
MTUR1 89	17	0.894	0.6139	0.052605	3.8e-06	0.0361178	2.4e-06		-0.0237614	0.11775	-0.0346078	0.118568
MTUR1 90	16.92	0.89	0.6112	0.0526087	3.7e-06	0.0361184	2.7e-06		0.0988527	0.11976	0.0263031	0.121635
MTUR1 91	16.93	0.891	0.6115	0.052602	3.4e-06	0.0361171	2.5e-06		-0.0950444	0.119759	0.0235351	0.129722
MTUR1 92	16.8	0.884	0.6067	0.0526053	3.8e-06	0.0361141	2.9e-06		0.0380204	0.118656	-0.0332269	0.122273
MTUR1 93	16.82	0.885	0.6075	0.0526046	3.6e-06	0.0361135	2.2e-06		-0.0332659	0.121853	-0.0858331	0.117768
MTUR1 94	16.79	0.8832	0.6064	0.0526049	3.6e-06	0.0361158	2.1e-06		-0.0209102	0.119638	-0.0124598	0.10558
MTUR1 95	16.83	0.885	0.6076	0.0526046	3.6e-06	0.0361134	2.3e-06		-0.00475241	0.116379	-0.0387653	0.107207
MTUR1 96	16.95	0.892	0.6122	0.0526048	3.4e-06	0.0361138	2.3e-06		-0.0142571	0.11527	-0.0166139	0.113596
MTUR1 97	16.86	0.887	0.609	0.0526065	3.5e-06	0.0361154	2.5e-06		0.0171084	0.109893	0.0193827	0.115169
MTUR1 98	16.98	0.893	0.6132	0.0526064	3.1e-06	0.0361156	2.4e-06		0.0351681	0.111023	0.0055378	0.125122
MTUR1 99	16.77	0.882	0.6057	0.0526026	3.5e-06	0.0361154	2.9e-06		-0.0579786	0.112174	-0.00138445	0.120725
MTUR1 100	16.99	0.894	0.6135	0.0526049	3.6e-06	0.0361153	2.2e-06		0.0494275	0.119704	0.0124602	0.123861
MTUR1 101	16.84	0.886	0.6082	0.052602	3.8e-06	0.0361143	2.6e-06		-0.0380199	0.119704	-0.0387643	0.113796
MTUR1 102	17.06	0.897	0.616	0.0526031	3.5e-06	0.0361161	2.3e-06		-0.00190103	0.119704	0.0789184	0.116857
MTUR1 103	18.54	0.976	0.6712	0.0526569	2.8e-06	0.0361935	2.2e-06		-0.0731095	0.0976641	-0.0179587	0.102115
MTUR1 104	18.34	0.966	0.6638	0.0526587	3e-06	0.0361935	2.1e-06		0.0626716	0.102429	0.0511168	0.105358
MTUR1 105	18.37	0.967	0.6649	0.0526658	2.5e-06	0.036194	2.3e-06		0.148126	0.106513	0.0732219	0.111689
MTUR1 106	18.13	0.9549	0.6563	0.0526621	3.6e-06	0.0361929	2.4e-06		0.00854512	0.0997972	0.0138151	0.114922
MTUR1 107	18.21	0.959	0.6589	0.0526575	2.9e-06	0.0361908	2.5e-06		-0.0218388	0.104653	0.0234872	0.114929
MTUR1 108	18.2	0.959	0.6588	0.0526552	3e-06	0.036187	2.3e-06		0.028488	0.0998658	0.027635	0.111843
MTUR1 109	17.82	0.938	0.6447	0.0526499	3.2e-06	0.0361812	2.2e-06		-0.106352	0.105401	-0.0842908	0.111854
MTUR1 110	17.65	0.929	0.6385	0.0526558	3.4e-06	0.0361815	2.5e-06		0.0607757	0.10644	0.00138192	0.107364
MTUR1 111	17.73	0.934	0.6416	0.0526553	3.1e-06	0.0361817	2e-06		-0.0522237	0.107529	-0.0511282	0.108949
MTUR1 112	17.77	0.936	0.643	0.0526603	3.3e-06	0.0361856	2.3e-06		0.0664681	0.103145	0.0746209	0.105527
MTUR1 113	17.91	0.943	0.6482	0.0526583	3e-06	0.0361841	2.3e-06		0.0617225	0.103148	0.0400745	0.111717
MTUR1 114	17.17	0.904	0.6211	0.0526502	3e-06	0.0361759	2.3e-06		-0.00379864	0.102017	-0.0718659	0.111734
MTUR1 115	17.19	0.905	0.6218	0.0526457	3.2e-06	0.0361741	2.3e-06		-0.120603	0.106583	-0.0704875	0.107025
MTUR1 116	17.38	0.915	0.6287	0.0526539	3.5e-06	0.0361774	2.1e-06		0.0636271	0.111944	0.0552862	0.11394
MTUR1 117	17.14	0.903	0.6201	0.0526554	3.5e-06	0.0361767	2.7e-06		0.000949571	0.116236	-0.0843013	0.112413
MTUR1 118	17.31	0.912	0.6264	0.0526568	3.6e-06	0.0361821	2.2e-06		0.0921143	0.111082	0.134062	0.112413
MTUR1 119	16.82	0.886	0.6086	0.0526485	3e-06	0.0361778	2.1e-06		-0.0674238	0.113403	-0.00414617	0.10709
MTUR1 120	16.9	0.89	0.6113	0.0526473	3.7e-06	0.0361738	2.4e-06		-0.0142455	0.112275	-0.0732521	0.113741
MTUR1 121	16.8	0.884	0.6077	0.0526476	3.5e-06	0.0361751	2.6e-06		0.0237433	0.118469	0.064966	0.118194
MTUR1 122	16.66	0.877	0.6025	0.0526454	3.6e-06	0.0361717	2.4e-06		-0.0446363	0.128068	-0.0511423	0.12474
MTUR1 123	16.18	0.8521	0.5854	0.0526479	4.5e-06	0.036172	2.8e-06		-0.0512815	0.127087	-0.0732557	0.121636
MTUR1 124	16.62	0.875	0.6012	0.0526511	3.4e-06	0.0361749	2.1e-06		-0.0113956	0.111848	-0.0345532	0.107096
MTUR1 125	16.47	0.867	0.5956	0.0526476	3.4e-06	0.0361747	2.2e-06		-0.00379883	0.11077	0.0345557	0.105412
MTUR1 126	16.08	0.846	0.5816	0.0526445	3.3e-06	0.036172	2.3e-06		-0.0484358	0.109677	-0.0677274	0.106959
MTUR1 127	16.33	0.8595	0.5906	0.0526465	3.3e-06	0.0361742	2.2e-06		0.0303923	0.110808	0.0704972	0.108559
MTUR1 128	15.94	0.839	0.5767	0.0526453	3.5e-06	0.0361713	2.3e-06		-0.0303912	0.114126	-0.037321	0.106964
MTUR1 129	16.31	0.859	0.5899	0.0526477	2.7e-06	0.0361727	2.2e-06		-0.0189938	0.10255	-0.0428482	0.11361
MTUR1 130	16.16	0.851	0.5846	0.0526443	3.5e-06	0.036169	2.3e-06		-0.0455869	0.0993927	-0.0801727	0.110205
MTUR1 131	16.18	0.852	0.5854	0.0526457	2.8e-06	0.0361711	2.4e-06		0.0417905	0.105728	0.0359416	0.108706
MTUR1 132	16.21	0.853	0.5862	0.0526427	3.3e-06	0.0361706	2.1e-06		-0.0227947	0.102242	0.00138234	0.105566
MTUR1 133	16.16	0.85	0.5844	0.0526421	3.2e-06	0.03617	2.1e-06		-0.0522368	0.104268	-0.0234996	0.10385
MTUR1 134	16.15	0.85	0.5843	0.052647	3e-06	0.0361711	2.3e-06		0.0132963	0.103132	0.0110587	0.10542
MTUR1 135	16.11	0.848	0.5827	0.0526505	3.2e-06	0.0361714	2.2e-06		0.0636312	0.105412	0.0221174	0.108563
MTUR1 136	15.93	0.839	0.5762	0.0526473	3.4e-06	0.0361701	2.3e-06		-0.0265913	0.107513	-0.00967641	0.108565
MTUR1 137	15.93	0.8384	0.576	0.0526469	3.2e-06	0.0361695	2.3e-06		0.0645854	0.10752	0.0843323	0.110146
MTUR1 138	15.48	0.815	0.56	0.0526436	3e-06	0.0361663	2.2e-06		0.0455917	0.0965637	0.0124427	0.110636
MTUR1 139	15.56	0.819	0.5627	0.0526406	3e-06	0.0361671	2.1e-06		-0.0541378	0.102103	-0.0276487	0.105429
MTUR1 140	15.4	0.811	0.557	0.0526433	3.3e-06	0.0361699	2.3e-06		-0.0246939	0.103172	0.0594452	0.113964
MTUR1 141	15.52	0.817	0.5614	0.0526486	3.1e-06	0.0361684	2.7e-06		0.0731317	0.10112	-0.0414709	0.116875
MTUR1 142	15.59	0.821	0.5639	0.0526462	2.8e-06	0.0361699	2.3e-06		-0.0360887	0.104744	-0.0414692	0.126661
MTUR1 143	15.69	0.826	0.5677	0.0526409	3.1e-06	0.0361707	2.5e-06		-0.0550872	0.110975	-0.0387039	0.12208
MTUR1 144	15.5	0.8158	0.5605	0.05264	3.4e-06	0.0361698	2.2e-06		0	0.10332	0.0470027	0.113493
MTUR1 145	16.44	0.865	0.594	0.0526107	3.4e-06	0.0361238	2.6e-06		0.00950386	0.10273	0.009689	0.118358
MTUR1 146	16.44	0.865	0.5937	0.0526066	3.3e-06	0.0361194	2.4e-06		0.00855413	0.106603	0.0027686	0.118371
MTUR1 147	16.52	0.869	0.5969	0.0526172	3.9e-06	0.0361219	2.2e-06		0.0579692	0.116696	-0.0429084	0.107538
MTUR1 148	16.56	0.871	0.5981	0.052612	3.2e-06	0.0361231	2e-06		-0.0788731	0.10966	-0.0027683	0.10406
MTUR1 149	16.72	0.8798	0.604	0.0526151	2.8e-06	0.0361245	2.3e-06		0.0427652	0.0978237	0.0456775	0.109128
MTUR1 150	16.66	0.876	0.6018	0.0526137	2.9e-06	0.0361226	2.5e-06		-0.0570161	0.101462	-0.069204	0.11842
MTUR1 151	16.46	0.866	0.5947	0.0526183	3.5e-06	0.0361257	2.6e-06		0.0798265	0.107882	0.081666	0.118422
MTUR1 152	16.31	0.858	0.5893	0.0526166	3.1e-06	0.0361265	2e-06		-0.0456109	0.102044	-0.017992	0.114161
MTUR1 153	16.57	0.872	0.5987	0.0526181	3.1e-06	0.0361244	2.5e-06		0.125448	0.105448	0.0484461	0.107537
MTUR1 154	16.26	0.855	0.5871	0.0526119	3.2e-06	0.0361161	2.2e-06		0.0836383	0.114335	-0.0359937	0.107128
MTUR1 155	16.25	0.855	0.587	0.0525993	3.7e-06	0.036112	2.3e-06		-0.132114	0.108107	-0.048458	0.112071
MTUR1 156	16.18	0.851	0.5843	0.0526006	2.9e-06	0.0361114	2.5e-06		0.0503822	0.109198	0.0290775	0.116803
MTUR1 157	16.23	0.8539	0.5863	0.0525993	3.5e-06	0.0361138	2.5e-06		-0.0551308	0.109837	0.0443064	0.11531
MTUR1 158	16.35	0.86	0.5904	0.0526021	3.2e-06	0.0361154	2.5e-06		-0.0636816	0.117753	-0.0263039	0.112472
MTUR1 159	16.32	0.8583	0.5893	0.0526062	3.8e-06	0.0361167	2e-06		0.0674871	0.116629	0.0415338	0.109152
MTUR1 160	16.18	0.851	0.5845	0.0526037	3.3e-06	0.036117	2.5e-06		-0.128302	0.102205	-0.078904	0.119885
MTUR1 161	16.14	0.849	0.583	0.0526083	3.1e-06	0.0361182	2.5e-06		0.111212	0.104312	0.0816829	0.113859
MTUR1 162	16.39	0.862	0.5919	0.0526046	3e-06	0.0361186	2.2e-06		-0.116896	0.112357	-0.0207645	0.109
MTUR1 163	16.26	0.856	0.5874	0.0526094	3.7e-06	0.0361181	2.1e-06		0.0218597	0.118232	-0.0595234	0.108999
MTUR1 164	13.68	0.7222	0.4975	0.0528031	3.4e-06	0.036378	2.6e-06		-0.00946905	0.106341	-0.0398577	0.114532
MTUR1 165	14.084	0.7437	0.5124	0.0528035	2.9e-06	0.0363791	2.2e-06		-0.0123096	0.102999	0.00687212	0.112971
MTUR1 166	14.152	0.7473	0.5149	0.0528052	3.1e-06	0.0363797	2.3e-06		0.00662818	0.109166	0.0206163	0.116526
MTUR1 167	14.32	0.7561	0.5209	0.0528062	3.9e-06	0.0363788	2.8e-06		0.00757493	0.107309	-0.0109953	0.122593
MTUR1 168	14.027	0.7407	0.5103	0.0528064	2.7e-06	0.0363787	2.6e-06		-0.022724	0.103358	-0.00824652	0.12861
MTUR1 169	13.89	0.7334	0.5052	0.052809	2.7e-06	0.0363792	2.7e-06		0.00378725	0.090795	0.00824654	0.12385
MTUR1 170	13.254	0.7002	0.4826	0.0528286	2.8e-06	0.0364122	2.3e-06		-0.0208216	0.102303	0.0260908	0.11642
MTUR1 171	13.41	0.709	0.4887	0.0528302	3.6e-06	0.0364145	2.8e-06		0.00757148	0.102302	0.0178504	0.116414
MTUR1 172	13.37	0.7063	0.4868	0.052831	2.9e-06	0.0364155	2.2e-06		-0.0113568	0.105354	0.0343272	0.117925
MTUR1 173	13.4	0.7077	0.4878	0.052833	3.1e-06	0.036414	2.4e-06		0.0369101	0.0994937	-0.00549236	0.111077
MTUR1 174	13.317	0.7036	0.4849	0.0528311	3.1e-06	0.0364129	2.4e-06		-0.035016	0.10163	-0.0398195	0.114158
MTUR1 175	13.34	0.7046	0.4856	0.0528329	3.1e-06	0.0364147	2.4e-06		0.0264993	0.10055	0.0562991	0.114159
MTUR1 176	13.45	0.7105	0.4897	0.0528319	3e-06	0.0364124	2.4e-06		-0.0406935	0.0983864	-0.0892473	0.111075
MTUR1 177	15.408	0.8135	0.5605	0.0528013	3e-06	0.036381	2.1e-06		-0.040717	0.09303	0.0398576	0.103253
MTUR1 178	15.83	0.836	0.576	0.052804	2.8e-06	0.0363808	2.1e-06		0.0293547	0.0940838	0.0467301	0.0999819
MTUR1 179	15.384	0.8123	0.5596	0.0528036	2.8e-06	0.0363772	2.1e-06		-0.0113627	0.0867227	-0.0934564	0.101594
MTUR1 180	15.71	0.8296	0.5716	0.0528044	2.3e-06	0.0363804	2.2e-06		0.0189382	0.0833705	0.0865926	0.103184
MTUR1 181	22.69	1.1914	0.8165	0.052502	2.4e-06	0.0359816	1.8e-06		-0.0390446	0.0771785	-0.00555837	0.0866465
MTUR1 182	22.69	1.1913	0.8165	0.0525081	2.4e-06	0.0359869	1.7e-06		-0.0390401	0.0825075	-0.086135	0.0884367
MTUR1 183	22.67	1.1906	0.816	0.0525123	2.6e-06	0.035991	2e-06		0.0180913	0.0793451	0.00972475	0.0900327
MTUR1 184	22.4	1.1761	0.8061	0.0525146	2.2e-06	0.0359944	1.9e-06		0.0238035	0.0804538	0.0222262	0.0915142
MTUR1 185	22.59	1.1863	0.8131	0.0525144	2.5e-06	0.0359962	1.8e-06		-0.00666479	0.0792947	-0.026391	0.0915059
MTUR1 186	22.42	1.1775	0.8072	0.0525149	2.5e-06	0.0359999	2e-06		0	0.0773499	0.00277779	0.0869592
MTUR1 187	22.25	1.1683	0.8009	0.0525154	2e-06	0.0360034	1.6e-06		-0.00666467	0.079749	0.0638869	0.0869543
MTUR1 188	22	1.1556	0.7922	0.0525166	2.7e-06	0.0360023	1.8e-06		-0.0276096	0.0786242	-0.0374962	0.0869504
MTUR1 189	22.14	1.1629	0.7972	0.0525207	2.4e-06	0.0360039	2e-06		0.0456984	0.0815426	0.0277755	0.0914898
MTUR1 190	22.45	1.179	0.8082	0.05252	2.3e-06	0.0360035	1.9e-06		-0.0456948	0.075897	-0.0847068	0.0946337
MTUR1 191	22.61	1.1876	0.8142	0.0525241	2.2e-06	0.0360092	2e-06		0.0323671	0.0770561	0.0583218	0.088566
MTUR1 192	22.44	1.1789	0.8082	0.0525248	2.5e-06	0.0360107	1.6e-06		-0.0199902	0.0749543	-0.0236035	0.0853651
MTUR1 193	22.42	1.1778	0.8075	0.0525276	2.1e-06	0.0360139	1.7e-06		0.0171341	0.078287	0.0680339	0.0818576
MTUR1 194	22.35	1.1738	0.8047	0.0525286	2.5e-06	0.0360122	1.8e-06		-0.00856669	0.0771414	-0.0694161	0.0849963
MTUR1 195	22.43	1.1783	0.8079	0.0525305	2.4e-06	0.0360155	1.8e-06		0.00951837	0.081347	0.0569232	0.0834856
MTUR1 196	22.38	1.1758	0.8061	0.0525314	2.5e-06	0.0360147	1.6e-06		-0.000951811	0.081345	-0.0680232	0.0851712
MTUR1 197	22.41	1.1775	0.8073	0.0525324	2.5e-06	0.0360188	1.9e-06		0.0123735	0.0846836	0.0819084	0.08517
MTUR1 198	21.76	1.1434	0.784	0.0525345	2.4e-06	0.0360231	1.8e-06		0.0114212	0.0769931	-0.0180437	0.086546
MTUR1 199	21.66	1.1378	0.7802	0.0525369	2.2e-06	0.0360235	1.8e-06		0.0104689	0.0747934	-0.0138796	0.0849729
MTUR1 200	21.74	1.142	0.7831	0.0525382	2.2e-06	0.0360249	1.7e-06		0.00761357	0.0759686	-0.0194306	0.0883474
MTUR1 201	22.12	1.1623	0.797	0.0525387	2.5e-06	0.0360277	2e-06		0.00380673	0.0749355	0.0208177	0.0899419
MTUR1 202	22.24	1.1682	0.8011	0.0525388	2.1e-06	0.036029	1.9e-06		-0.0104683	0.0806396	0.00416333	0.0899384
MTUR1 203	22.06	1.159	0.7948	0.05254	2.7e-06	0.03603	1.7e-06		-0.000951655	0.0829413	0.0166531	0.0882504
MTUR1 204	22.14	1.1632	0.7977	0.0525413	2.7e-06	0.0360298	1.9e-06		0.0104681	0.0858377	-0.0346923	0.0866179
MTUR1 205	21.96	1.1537	0.7912	0.0525415	2.4e-06	0.0360321	1.8e-06		0.0190329	0.0858379	0.0596726	0.0881604
MTUR1 206	22.1	1.161	0.7962	0.0525397	2.7e-06	0.0360301	1.8e-06		-0.0304522	0.085838	-0.0707691	0.0865261
MTUR1 207	22.15	1.164	0.7983	0.0525411	2.7e-06	0.0360332	1.8e-06		0.0104681	0.0901201	0.0346914	0.0881561
MTUR1 208	21.94	1.1527	0.7905	0.0525414	2.8e-06	0.0360338	1.9e-06		-0.0437731	0.089045	-0.0555004	0.0897509
MTUR1 209	21.89	1.1501	0.7888	0.0525463	2.6e-06	0.0360384	1.9e-06		0.0723224	0.0858754	0.0666001	0.094633
MTUR1 210	21.968	1.1543	0.7917	0.0525436	2.4e-06	0.0360382	2.1e-06		-0.062801	0.0824505	-0.0596554	0.0916506
MTUR1 211	21.85	1.1482	0.7875	0.0525475	2.5e-06	0.0360423	1.7e-06		0.00951529	0.0791543	0.0776925	0.0885729
MTUR1 212	21.67	1.1387	0.781	0.0525504	2.3e-06	0.0360408	1.7e-06		0.0152237	0.0875148	-0.0638125	0.086767
MTUR1 213	21.352	1.1221	0.7696	0.0525517	3.1e-06	0.0360439	2e-06		0.00190289	0.0864925	0.0110977	0.0883029
MTUR1 214	22	1.1563	0.7931	0.0525528	2.4e-06	0.0360462	1.8e-06		0.0304465	0.0895167	0.0194199	0.0882985
MTUR1 215	22.13	1.1628	0.7976	0.0525507	2.6e-06	0.0360471	1.7e-06		-0.0304459	0.0792845	0.041614	0.0865809
MTUR1 216	22.15	1.1642	0.7985	0.0525518	2.2e-06	0.036045	1.9e-06		2.22045e-13	0.0827043	-0.0346777	0.0865815
MTUR1 217	22.23	1.168	0.8018	0.0525529	2.7e-06	0.0360454	1.8e-06		-0.00380567	0.0794193	0.00832291	0.089726
MTUR1 218	22.01	1.156	0.7928	0.0525544	2.3e-06	0.0360452	1.9e-06		0.0247369	0.083681	0.00693578	0.0881252
MTUR1 219	22.2	1.1666	0.8001	0.0525533	2.6e-06	0.0360445	1.8e-06		-0.0247362	0.0813989	-0.0374523	0.0897254
MTUR1 220	22.05	1.1588	0.7948	0.0525548	2.5e-06	0.0360465	1.9e-06		0.0104654	0.0846046	-0.0013871	0.0865799
MTUR1 221	22.02	1.1572	0.7937	0.0525552	2.6e-06	0.0360486	1.7e-06		0.0123681	0.0835057	0.0346766	0.0898911
MTUR1 222	22.03	1.1575	0.794	0.0525543	2.5e-06	0.0360482	2e-06		-0.00285418	0.0868849	-0.0124831	0.0932507
MTUR1 223	22.13	1.163	0.7978	0.0525537	2.8e-06	0.0360487	2.1e-06		-0.00570841	0.0879831	0.0388379	0.0961774
MTUR1 224	21.94	1.153	0.7908	0.0525537	2.7e-06	0.0360464	1.9e-06		-0.0285414	0.089025	-0.0776716	0.0916281
MTUR1 225	21.73	1.1421	0.7834	0.0525567	2.6e-06	0.0360497	1.7e-06		0.0456671	0.0836784	0.019418	0.0834972
MTUR1 226	21.79	1.1451	0.7855	0.0525549	2.3e-06	0.0360516	1.6e-06		-0.0409079	0.0813954	-0.00832134	0.0834901
MTUR1 227	22.05	1.1589	0.795	0.0525574	2.5e-06	0.0360541	1.9e-06		0.0323466	0.0837629	0.02635	0.0850836
MTUR1 228	22.1	1.1613	0.7967	0.0525565	2.8e-06	0.0360547	1.8e-06		-0.0466143	0.0847699	0.00693396	0.0913598
MTUR1 229	22.192	1.1664	0.8001	0.0525605	2.4e-06	0.0360548	2e-06		0.0532748	0.082694	-0.0180278	0.0868252
MTUR1 230	22.11	1.162	0.7971	0.0525589	2.3e-06	0.0360562	1.6e-06		0.0085619	0.0864818	0.0249617	0.0954744
MTUR1 231	22.28	1.1709	0.8033	0.0525564	3.1e-06	0.0360558	2.3e-06		-0.0703956	0.09073	-0.0665591	0.0923579
MTUR1 232	22.05	1.1587	0.7949	0.0525613	2.8e-06	0.0360602	1.8e-06		0.0323442	0.0916611	0.0707201	0.0966289
MTUR1 233	22.11	1.162	0.7972	0.0525628	2.4e-06	0.0360595	1.9e-06		0.0152201	0.0858451	-0.0374367	0.0865466
MTUR1 234	22.086	1.1609	0.7964	0.0525627	2.6e-06	0.0360615	1.7e-06		-0.0294877	0.0835347	0.0291178	0.0881741
MTUR1 235	21.896	1.151	0.7896	0.0525657	2.6e-06	0.0360614	1.9e-06		0.0627825	0.083535	0.0457574	0.0881754
MTUR1 236	23.19	1.2176	0.8345	0.0525106	2.6e-06	0.0359902	2e-06		-0.0095218	0.0825056	-0.0555676	0.0900308
MTUR1 237	23.05	1.2106	0.8298	0.0525143	2.4e-06	0.0359975	1.9e-06		0.0399907	0.0803651	0.0847353	0.0900227
MTUR1 238	22.81	1.198	0.8212	0.0525138	2.3e-06	0.0359987	1.7e-06		-0.0342755	0.0803614	-0.0541657	0.0851202
MTUR1 239	22.8	1.1973	0.8208	0.0525169	2.6e-06	0.0360038	1.7e-06		-0.0333215	0.0792897	-0.0152759	0.0834157
MTUR1 240	22.48	1.1808	0.8096	0.0525235	2.3e-06	0.03601	1.8e-06		0.0295115	0.0762781	0.0805397	0.0850096
MTUR1 241	22.41	1.1769	0.8068	0.052527	2e-06	0.0360104	1.8e-06		-0.0114226	0.0750477	-0.066643	0.0882057
MTUR1 242	22.34	1.1734	0.8045	0.0525317	2.5e-06	0.0360156	1.9e-06		0.0390256	0.0750434	0.040262	0.0851762
MTUR1 243	22.06	1.1591	0.7947	0.0525323	2.3e-06	0.0360179	1.6e-06		-1.11022e-13	0.0850246	-0.0430323	0.0978403
MTUR1 244	21.384	1.1234	0.7703	0.0525329	2.9e-06	0.0360233	2.5e-06		0.0114215	0.0861042	0.0735689	0.0936076
MTUR1 245	21.85	1.148	0.7872	0.0525323	2.6e-06	0.0360234	1.6e-06		-0.0256978	0.0870866	0.0194322	0.0949539
MTUR1 246	22.51	1.1827	0.8111	0.0525386	2.6e-06	0.0360295	1.7e-06		0.0142754	0.0835752	0.0471858	0.0850518
MTUR1 247	22.37	1.1756	0.8062	0.0525413	2.6e-06	0.0360335	1.9e-06		0.00285491	0.0796655	0.0111009	0.0866113
MTUR1 248	22.37	1.1755	0.8062	0.0525437	2e-06	0.0360367	1.8e-06		0.0123708	0.0833285	0.0402384	0.0897497
MTUR1 249	22.21	1.1669	0.8003	0.0525448	2.9e-06	0.036037	1.9e-06		-0.0314008	0.0780505	-0.0887897	0.0897409
MTUR1 250	21.972	1.1546	0.792	0.0525492	2.1e-06	0.0360437	1.9e-06		0.0152241	0.0809848	0.018034	0.0882178
MTUR1 251	22.22	1.1676	0.8009	0.052552	2.3e-06	0.0360491	1.7e-06		0.0333015	0.073675	0.124845	0.0882104
MTUR1 252	22.28	1.1709	0.8031	0.0525513	2.3e-06	0.0360455	1.9e-06		-0.0371052	0.0758044	-0.0735128	0.0898926
MTUR1 253	22.45	1.1797	0.8084	0.0525545	2.3e-06	0.0360472	2e-06		0.0285426	0.0758031	0.0721329	0.0913824
MTUR1 254	22.14	1.1634	0.798	0.0525542	2.4e-06	0.0360473	1.8e-06		-0.0180762	0.0791426	0.036065	0.0849197
MTUR1 255	21.84	1.1476	0.7871	0.0525556	2.5e-06	0.0360483	1.7e-06		0.0304449	0.0771038	0.00138703	0.0849152
MTUR1 256	21.68	1.1395	0.7816	0.0525538	2.1e-06	0.0360492	1.8e-06		-0.0694478	0.078243	-0.0693449	0.0882844
MTUR1 257	22.2	1.167	0.8006	0.0525593	2.5e-06	0.0360551	2e-06		0.0675473	0.0749089	0.0832129	0.0868301
MTUR1 258	22.19	1.1661	0.8	0.0525577	2.2e-06	0.036055	1.6e-06		-0.049467	0.0759377	-0.030508	0.0884475
MTUR1 259	22.06	1.1594	0.7953	0.0525613	2.2e-06	0.0360571	1.9e-06		0.013318	0.0759353	-0.0637836	0.0850713
MTUR1 260	22.08	1.1608	0.7964	0.0525635	2.2e-06	0.0360618	1.7e-06		-0.0209266	0.0769958	-0.0457527	0.0832803

## Sheet: Table S3 matrix-matched
Table S3 Comparison of in-situ and bulk-rock Si isotope ratios for zircon and glass reference materials
	LA-MC-ICP-MS			Solution Nebulizer MC-ICP-MS
	δ30Sia (‰)	2SD		δ30Si (‰)	2SD
91500	-0.4	0.15		-0.39b	0.1
Plešovice	-0.43	0.12		-0.39b	0.06
SA01	-0.33	0.16		-0.29c	0.08
Penglai	-0.29	0.13		-0.34d	0.06
Qinghu	-0.52	0.2		-0.45d	0.06
612	-0.02	0.09		0.02e	0.12
a: data from this study; b: data from Guitreau et al. (2020); c: data from Huang et al. (2021); d: data from Liu et al. (2022); e: data from Schuessler and Blanckenburg (2014)

## Sheet: Table S4 NIST 610-zircon
Table S4 Comparison of bulk-rock and NIST 610-calibrated in-situ Si isotope values in zircons
	LA-MC-ICP-MS			Solution Nebulizer MC-ICP-MS
	δ30Sia (‰)	2SD		δ30Si (‰)	2SD
91500	0.29	0.33		-0.39b	0.1
Plešovice	0.37	0.12		-0.39b	0.06
SA01	0.45	0.15		-0.29c	0.08
Penglai	0.44	0.17		-0.34d	0.06
a: data from this study; b: data from Guitreau et al. (2020); c: data from Huang et al. (2021); d: data from Liu et al. (2022)

## Sheet: Table S5 NIST 610-zircon water 
Table S5 Assessment of matrix effect between zircon and silicate glass with water vapor introduction
	LA-MC-ICP-MS			Solution Nebulizer MC-ICP-MS
	δ30Sia (‰)	2SD		δ30Si (‰)	2SD
91500	-0.05	0.33		-0.39b	0.1
GJ-1	-0.22	0.38		-0.38	0.12
a: data from this study; b: data from Guitreau et al. (2020)

## Sheet: Tabler S6 Laser focus position
Table S6 Evaluation of laser focus position influence on Si isotope
Laser focusing positions (μm)	δ30Si (‰)	2SD
-200	0.31	0.11
-190	0.06	0.17
-180	0.04	0.27
-170	0.05	0.29
-160	0.14	0.21
-150	-0.08	0.09
-140	-0.01	0.05
-130	-0.08	0.12
-120	-0.09	0.14
-110	0.21	0.29
-100	0.12	0.26
-90	0.32	0.03
-80	0.36	0.09
-70	0.33	0.09
-60	0.32	0.21
-50	0.22	0.11
-40	0.19	0.03
-30	0.18	0.24
-20	0.22	0.03
-10	0.26	0.03
0	0.34	0.08
10	0.3	0.17
20	0.28	0.01
30	0.29	0.01
40	0.25	0.06
50	0.11	0.15
60	0.1	0.24
70	0.23	0.02
80	0.19	0.07
90	0.15	0.08
100	0.12	0.26
110	0.06	0.36
120	0.08	0.12
130	-0.04	0.14
140	0.26	0.06
150	0.11	0.1
160	0.13	0.14
170	0.17	0.13
180	0.08	0.33

## Sheet: Table S7 Zircon Si isotope
Table S7 In-situ Si isotope data of the different zircon reference materials
Sample	28Si	29Si	30Si	29Si/28Si	2SE	30Si/28Si	2SE			δ29Si (‰)	2SE	δ30Si (‰)	2SE
91500 01	16.97	0.893	0.6139	0.0526514	3.6e-06	0.0361792	2.7e-06			-0.226975	0.125384	-0.283334	0.127114
91500 02	16.94	0.8919	0.6128	0.0526501	3.2e-06	0.0361757	2.4e-06			-0.251665	0.121409	-0.380081	0.122433
91500 03	17.07	0.899	0.6177	0.0526532	3e-06	0.0361797	2.1e-06			-0.231721	0.118411	-0.324798	0.119584
91500 04	16.94	0.892	0.6128	0.0526528	3.6e-06	0.0361754	2.5e-06			-0.239317	0.124297	-0.443651	0.125329
91500 05	16.72	0.88	0.6048	0.0526509	3.5e-06	0.0361758	2.4e-06			-0.200388	0.117147	-0.453323	0.115689
91500 06	16.89	0.8894	0.6111	0.05265	4e-06	0.0361751	2.5e-06			-0.217481	0.122786	-0.47267	0.117297
91500 07	16.59	0.873	0.6	0.0526448	3.7e-06	0.0361736	2.6e-06			-0.218435	0.121632	-0.40496	0.122
91500 08	16.51	0.8691	0.5971	0.0526454	3.7e-06	0.0361681	2.4e-06			-0.207039	0.121631	-0.556995	0.118833
91500 09	16.58	0.873	0.5998	0.0526436	3.4e-06	0.0361705	2.4e-06			-0.244078	0.12449	-0.461631	0.125097
91500 10	16.5	0.869	0.5968	0.0526422	3.3e-06	0.0361684	2.3e-06			-0.27067	0.123516	-0.519683	0.123655
91500 11	16.34	0.86	0.5909	0.0526445	3.7e-06	0.0361698	2.2e-06			-0.215587	0.125372	-0.451959	0.123841
91500 12	16.48	0.8677	0.5962	0.0526436	3.3e-06	0.0361721	2.3e-06			-0.232682	0.121276	-0.388377	0.12522
91500 13	16.62	0.875	0.6013	0.0526435	3.3e-06	0.0361717	2.1e-06			-0.236481	0.133186	-0.344147	0.129545
91500 14	16.54	0.871	0.5983	0.0526478	3.6e-06	0.0361698	2.8e-06			-0.154804	0.135958	-0.396674	0.139299
91500 15	16.5	0.8685	0.5967	0.0526482	3.3e-06	0.0361727	2.7e-06			-0.230777	0.131212	-0.378702	0.133635
91500 16	16.58	0.873	0.5998	0.0526505	3.3e-06	0.0361762	2.4e-06			-0.187094	0.131211	-0.281947	0.129183
91500 17	16.3	0.8582	0.5896	0.0526526	3.9e-06	0.036174	2.6e-06			-0.172849	0.123385	-0.384229	0.117502
91500 18	16.65	0.8765	0.6022	0.0526503	3.3e-06	0.0361747	2.5e-06			-0.216531	0.116901	-0.364879	0.115831
91500 19	16.37	0.8617	0.592	0.0526486	3.5e-06	0.0361715	2.6e-06			-0.176648	0.120059	-0.429842	0.117506
91500 20	16.42	0.865	0.594	0.0526502	3.6e-06	0.0361713	2.4e-06			-0.146258	0.12112	-0.43537	0.114208
91500 21	15.89	0.8365	0.5747	0.0526485	3.5e-06	0.0361709	2.3e-06			-0.122513	0.120063	-0.399437	0.115707
91500 22	15.96	0.8404	0.5774	0.0526452	3.4e-06	0.0361705	2.6e-06			-0.185196	0.119024	-0.410494	0.120465
91500 23	15.94	0.839	0.5764	0.0526463	3.3e-06	0.0361716	2.5e-06			-0.157653	0.118004	-0.371792	0.120337
91500 24	16.04	0.844	0.5802	0.0526429	3.8e-06	0.0361703	2.5e-06			-0.222236	0.123315	-0.407731	0.120339
91500 25	15.97	0.841	0.5777	0.0526453	3.4e-06	0.0361721	2.2e-06			-0.179497	0.121188	-0.351058	0.115773
91500 26	15.8	0.832	0.5716	0.0526483	4.3e-06	0.0361677	2.8e-06			-0.122513	0.131096	-0.472697	0.125291
91500 27	15.96	0.8403	0.5774	0.0526483	3.7e-06	0.0361741	2.8e-06			-0.136759	0.127538	-0.252914	0.125285
91500 28	15.97	0.841	0.5776	0.052648	3.4e-06	0.0361711	2.8e-06			-0.142458	0.124489	-0.335853	0.125289
91500 29	16.05	0.845	0.5805	0.0526522	3.9e-06	0.0361781	2.2e-06			-0.131064	0.12477	-0.262599	0.120705
91500 30	15.82	0.833	0.5723	0.0526525	4.1e-06	0.036176	2.5e-06			-0.125366	0.127062	-0.32065	0.12509
91500 31	15.98	0.8414	0.5781	0.0526512	4.2e-06	0.0361758	2.6e-06			-0.144359	0.117412	-0.344146	0.125211
91500 32	16.08	0.847	0.5817	0.0526508	3.3e-06	0.0361674	2.7e-06			-0.151956	0.10654	-0.576345	0.126828
91500 33	15.85	0.835	0.5734	0.0526448	3.2e-06	0.0361686	2.4e-06			-0.189945	0.108828	-0.396676	0.115714
91500 34	15.59	0.8209	0.564	0.0526441	4.2e-06	0.0361683	3e-06			-0.203241	0.120473	-0.40497	0.125963
91500 35	15.29	0.805	0.5528	0.052643	3.4e-06	0.036165	2.9e-06			-0.202292	0.111919	-0.47409	0.128611
91500 36	15.7	0.8266	0.5679	0.0526476	4.4e-06	0.0361723	2.7e-06			-0.114914	0.123852	-0.272264	0.125229
91500 37	15.48	0.8149	0.5599	0.0526399	3.7e-06	0.0361696	2.4e-06			-0.247882	0.115305	-0.356588	0.116307
91500 38	16.25	0.8557	0.5879	0.0526427	4.8e-06	0.0361672	3.8e-06			-0.194694	0.129107	-0.422941	0.141999
91500 39	15.3	0.805	0.5533	0.0526393	3.9e-06	0.0361637	2.6e-06			-0.224139	0.122398	-0.505885	0.113252
91500 40	15.39	0.81	0.5566	0.0526436	4.5e-06	0.0361681	2.5e-06			-0.142456	0.12961	-0.384236	0.111512
Plešovice 01	20.2	1.065	0.733	0.0527221	2.5e-06	0.0362778	2e-06			-0.196554	0.0864235	-0.51363	0.0985883
Plešovice 02	20.34	1.073	0.738	0.0527212	2.4e-06	0.0362795	1.9e-06			-0.236383	0.0864642	-0.488822	0.0985851
Plešovice 03	20.56	1.084	0.746	0.0527228	2.4e-06	0.0362781	2e-06			-0.19845	0.0836083	-0.519139	0.100078
Plešovice 04	20.71	1.092	0.751	0.0527224	2.2e-06	0.0362786	1.9e-06			-0.190864	0.0793713	-0.436466	0.0985906
Plešovice 05	20.7	1.091	0.751	0.052722	2.4e-06	0.0362783	2e-06			-0.196554	0.0854819	-0.491583	0.0942152
Plešovice 06	20.71	1.092	0.751	0.0527189	2.8e-06	0.0362774	2.2e-06			-0.218367	0.0906928	-0.439225	0.0989017
Plešovice 07	20.78	1.096	0.754	0.0527194	2.5e-06	0.0362781	1.9e-06			-0.203194	0.0854011	-0.366186	0.0989032
Plešovice 08	20.75	1.094	0.753	0.0527196	2.4e-06	0.0362759	2e-06			-0.197503	0.0910097	-0.461278	0.106272
Plešovice 09	20.74	1.093	0.752	0.052716	2.4e-06	0.0362761	1.8e-06			-0.259149	0.0900778	-0.466789	0.0947843
Plešovice 10	20.66	1.089	0.749	0.0527176	2.2e-06	0.0362783	2.1e-06			-0.224059	0.0802998	-0.400639	0.0977042
Plešovice 11	21.17	1.116	0.768	0.0527195	2.2e-06	0.0362805	2e-06			-0.15198	0.0803007	-0.279358	0.0987492
Plešovice 12	20.88	1.101	0.758	0.0527157	2.4e-06	0.0362766	1.9e-06			-0.20699	0.0803928	-0.435094	0.0940603
Plešovice 13	20.95	1.105	0.76	0.0527167	2.5e-06	0.0362794	1.6e-06			-0.260096	0.0825095	-0.406149	0.0944581
Plešovice 14	21.51	1.134	0.78	0.0527189	2.5e-06	0.0362801	1.8e-06			-0.182329	0.0835718	-0.359294	0.0956185
Plešovice 15	21.14	1.114	0.767	0.0527223	2.2e-06	0.0362794	2.1e-06			-0.130167	0.085569	-0.368941	0.0972352
Plešovice 16	20.89	1.101	0.758	0.0527192	2.4e-06	0.0362783	2e-06			-0.248713	0.0895927	-0.432333	0.100386
Plešovice 17	20.97	1.106	0.761	0.0527215	2.3e-06	0.0362806	2e-06			-0.230693	0.0865887	-0.375831	0.10322
Plešovice 18	21.09	1.112	0.765	0.0527257	2.6e-06	0.036284	1.8e-06			-0.138705	0.0874761	-0.298658	0.0941318
Plešovice 19	20.41	1.076	0.74	0.0527014	2.3e-06	0.036251	2.1e-06			-0.249688	0.0793504	-0.473772	0.100681
Plešovice 20	20.28	1.069	0.735	0.0526959	2.2e-06	0.0362498	1.8e-06			-0.354041	0.0783251	-0.50687	0.0961586
Plešovice 21	20.63	1.087	0.748	0.0526985	2.3e-06	0.0362526	1.9e-06			-0.302813	0.0916275	-0.437914	0.0959184
Plešovice 22	20.24	1.067	0.734	0.0526952	2.3e-06	0.0362502	1.8e-06			-0.312308	0.0986508	-0.45309	0.100379
Plešovice 23	20.19	1.064	0.732	0.0527005	2.3e-06	0.0362518	2e-06			-0.211744	0.0986488	-0.408957	0.103219
Plešovice 24	20.45	1.078	0.741	0.0527005	3.3e-06	0.0362503	2e-06			-0.187077	0.104327	-0.466879	0.106412
Plešovice 25	20.18	1.064	0.732	0.0527037	2.4e-06	0.0362527	1.9e-06			-0.179487	0.0844282	-0.469629	0.101127
Plešovice 26	20.53	1.082	0.744	0.0526994	2.2e-06	0.0362511	1.9e-06			-0.261074	0.0803219	-0.477908	0.0942793
Plešovice 27	20.58	1.084	0.746	0.0526942	2.6e-06	0.0362528	1.8e-06			-0.4432	0.0865349	-0.512371	0.092769
Plešovice 28	20.88	1.1	0.757	0.0527008	2.6e-06	0.0362544	1.9e-06			-0.317983	0.0865314	-0.468244	0.0942728
Plešovice 29	20.99	1.106	0.761	0.0527011	2.3e-06	0.0362531	2e-06			-0.293322	0.0854643	-0.512369	0.0913224
Plešovice 30	20.88	1.101	0.757	0.0526973	2.6e-06	0.0362519	1.8e-06			-0.25254	0.0895456	-0.407578	0.0896058
Plešovice 31	20.84	1.098	0.756	0.0526928	2.5e-06	0.0362459	1.7e-06			-0.29429	0.0846935	-0.511025	0.0911703
Plešovice 32	21.18	1.116	0.768	0.0526949	2.2e-06	0.0362481	1.8e-06			-0.254441	0.0816396	-0.450338	0.0926182
Plešovice 33	21.61	1.139	0.783	0.052692	2.4e-06	0.0362478	1.7e-06			-0.355952	0.0804172	-0.487573	0.0942853
Plešovice 34	21.59	1.138	0.783	0.0526988	2.5e-06	0.0362529	2e-06			-0.226924	0.0815036	-0.346896	0.0986594
Plešovice 35	21.58	1.137	0.782	0.0527013	2.5e-06	0.0362554	2e-06			-0.265814	0.082443	-0.402056	0.0958348
Plešovice 36	21.52	1.134	0.78	0.0527075	2.5e-06	0.0362593	1.8e-06			-0.148181	0.0824398	-0.294492	0.0927663
Plešovice 37	20.56	1.084	0.746	0.0527046	2.3e-06	0.0362566	1.8e-06			-0.230712	0.0824398	-0.429631	0.0944302
Plešovice 38	20.14	1.062	0.73	0.0527081	2.5e-06	0.0362577	2e-06			-0.198458	0.0874577	-0.431007	0.100211
Plešovice 39	19.96	1.052	0.724	0.0527119	2.2e-06	0.0362621	2.1e-06			-0.167154	0.0834527	-0.388257	0.100202
Plešovice 40	20.32	1.071	0.737	0.0527039	2.5e-06	0.03626	1.6e-06			-0.187076	0.0895795	-0.404806	0.0929215
SA01 01	21.41	1.129	0.777	0.0527189	2.5e-06	0.0362782	2.3e-06			-0.155773	0.0874441	-0.311056	0.107803
SA01 02	21.12	1.113	0.766	0.0527175	2.4e-06	0.0362785	1.8e-06			-0.203195	0.0854037	-0.309678	0.100318
SA01 03	20.95	1.105	0.76	0.052721	2.2e-06	0.0362764	2e-06			-0.170948	0.0834399	-0.390995	0.101635
SA01 04	20.97	1.106	0.761	0.0527207	2.7e-06	0.036281	1.9e-06			-0.189916	0.0895538	-0.2449	0.103448
SA01 05	20.63	1.087	0.748	0.0527177	2.4e-06	0.0362754	1.6e-06			-0.231645	0.0864279	-0.378592	0.102679
SA01 06	20.73	1.093	0.752	0.0527192	2.2e-06	0.0362807	2e-06			-0.207935	0.0834405	-0.265575	0.101781
SA01 07	20.65	1.088	0.749	0.0527197	2.6e-06	0.0362806	1.9e-06			-0.177587	0.0845337	-0.283493	0.0955423
SA01 08	20.57	1.085	0.746	0.0527205	2.5e-06	0.0362774	2.2e-06			-0.155774	0.0908128	-0.430957	0.10178
SA01 09	20.5	1.081	0.744	0.0527196	2.4e-06	0.0362786	1.9e-06			-0.152928	0.0854033	-0.371698	0.0956214
SA01 10	20.43	1.077	0.741	0.0527216	3e-06	0.0362815	2.1e-06			-0.0893814	0.0949207	-0.264198	0.0957791
SA01 11	20.81	1.097	0.755	0.0527228	2.7e-06	0.0362818	1.8e-06			-0.0723098	0.0936419	-0.231118	0.0941409
SA01 12	20.67	1.09	0.75	0.0527215	2.3e-06	0.0362847	2e-06			-0.114991	0.0886483	-0.189776	0.101626
SA01 13	20.74	1.093	0.752	0.0527167	2.2e-06	0.0362809	2.1e-06			-0.214576	0.0855724	-0.334487	0.104647
SA01 14	20.92	1.103	0.759	0.0527188	2.3e-06	0.0362836	1.8e-06			-0.177587	0.0833996	-0.266959	0.0972312
SA01 15	21.18	1.116	0.768	0.0527226	2.4e-06	0.0362828	1.7e-06			-0.130167	0.0823328	-0.319329	0.0910986
SA01 16	21.07	1.111	0.765	0.0527237	2.4e-06	0.0362833	1.9e-06			-0.113096	0.0833527	-0.319329	0.0925451
SA01 17	21.04	1.109	0.763	0.0527222	2.3e-06	0.0362824	2.1e-06			-0.166207	0.0823317	-0.357915	0.0957722
SA01 18	20.91	1.102	0.759	0.0527226	2.3e-06	0.036282	2.2e-06			-0.173793	0.0833945	-0.379963	0.0988937
SA01 19	21.37	1.126	0.775	0.0526915	2.2e-06	0.0362463	1.9e-06			-0.18708	0.0813826	-0.251707	0.0973228
SA01 20	20.66	1.088	0.749	0.052698	2.3e-06	0.0362511	1.8e-06			-0.217438	0.0793109	-0.40758	0.0944441
SA01 21	20.71	1.091	0.751	0.0527007	2.5e-06	0.0362514	2e-06			-0.133946	0.0834697	-0.378618	0.0991233
SA01 22	20.43	1.077	0.741	0.0526993	2.7e-06	0.0362487	2e-06			-0.160512	0.0856842	-0.453095	0.0991256
SA01 23	20.69	1.091	0.75	0.0527018	2.8e-06	0.0362533	1.8e-06			-0.150076	0.0849426	-0.334483	0.0896064
SA01 24	20.92	1.103	0.758	0.0526928	3.3e-06	0.0362471	1.7e-06			-0.317057	0.0921084	-0.435171	0.0881162
SA01 25	21.02	1.108	0.762	0.0526929	3.2e-06	0.0362473	2.1e-06			-0.31516	0.0908287	-0.429654	0.0944528
SA01 26	20.88	1.1	0.757	0.0526912	3.3e-06	0.0362431	1.9e-06			-0.283858	0.0947141	-0.471042	0.0926289
SA01 27	21.45	1.13	0.777	0.0526911	3.3e-06	0.0362419	2.1e-06			-0.243062	0.0947161	-0.435185	0.0959442
SA01 28	21.56	1.136	0.781	0.0526966	2.9e-06	0.0362473	1.9e-06			-0.138688	0.0898735	-0.2862	0.0927114
SA01 29	21.52	1.134	0.78	0.0526957	3e-06	0.036247	2.1e-06			-0.203208	0.0892085	-0.306893	0.0974735
SA01 30	21.89	1.154	0.794	0.0526888	2.2e-06	0.0362423	1.9e-06			-0.324658	0.0837351	-0.413114	0.0971657
SA01 31	21.61	1.139	0.783	0.0526924	2.3e-06	0.0362429	1.7e-06			-0.256343	0.084696	-0.39656	0.0943025
SA01 32	21.43	1.129	0.777	0.0526934	2.3e-06	0.0362447	1.5e-06			-0.217442	0.0846964	-0.384142	0.0916794
SA01 33	21.67	1.142	0.785	0.0526979	2.2e-06	0.0362496	1.8e-06			-0.132046	0.0837324	-0.248956	0.0956977
SA01 34	21.51	1.134	0.78	0.052691	2.3e-06	0.0362431	1.7e-06			-0.189927	0.0952679	-0.34	0.105904
SA01 35	21.73	1.145	0.788	0.052688	2e-06	0.0362438	1.8e-06			-0.246862	0.0927981	-0.320686	0.107154
SA01 36	21.75	1.146	0.788	0.0526978	2.5e-06	0.0362489	1.9e-06			-0.111171	0.0910878	-0.286202	0.103382
SA01 37	21.93	1.156	0.795	0.0527036	2.5e-06	0.0362543	1.6e-06			-0.00110256	0.0910851	-0.137224	0.0994389
SA01 38	21.67	1.142	0.785	0.0526938	2.6e-06	0.0362471	2e-06			-0.207954	0.0855215	-0.371726	0.103307
SA01 39	21.6	1.139	0.783	0.0527024	2.4e-06	0.036252	2e-06			-0.0447528	0.0833853	-0.236547	0.103303
SA01 40	21.15	1.115	0.767	0.0526992	2.2e-06	0.0362542	1.7e-06			-0.178539	0.0794023	-0.248968	0.0991241
GJ-1 01	19.33	1.02	0.702	0.0527645	3.2e-06	0.0363375	2.3e-06			-0.247698	0.115937	-0.513345	0.10913
GJ-1 02	19.26	1.016	0.7	0.0527641	3.2e-06	0.0363396	2e-06			-0.255278	0.115937	-0.455563	0.104556
GJ-1 03	19.29	1.018	0.701	0.0527692	3.2e-06	0.0363399	2.2e-06			-0.18137	0.112489	-0.404663	0.104704
GJ-1 04	19.34	1.021	0.703	0.052768	3e-06	0.0363387	2.2e-06			-0.20411	0.110493	-0.437682	0.104705
GJ-1 05	19.06	1.006	0.6927	0.0527701	3.5e-06	0.0363404	2e-06			-0.184212	0.117682	-0.417043	0.101618
GJ-1 06	19.13	1.009	0.695	0.0527686	3.5e-06	0.0363392	2.2e-06			-0.212637	0.117684	-0.450062	0.104702
GJ-1 07	19.22	1.014	0.6987	0.05277	3.9e-06	0.0363432	2.6e-06			-0.179475	0.120099	-0.363388	0.118503
GJ-1 08	19.32	1.02	0.7022	0.0527709	3.3e-06	0.0363396	2.1e-06			-0.16242	0.113457	-0.462441	0.110745
GJ-1 09	19.43	1.025	0.7062	0.0527686	3.7e-06	0.0363415	2.3e-06			-0.184213	0.113839	-0.374395	0.115202
GJ-1 10	19.29	1.018	0.7012	0.0527695	3.6e-06	0.0363415	2.1e-06			-0.167157	0.112681	-0.374395	0.112273
GJ-1 11	19.22	1.014	0.6986	0.052766	3.3e-06	0.0363399	2.1e-06			-0.217377	0.107213	-0.434928	0.106174
GJ-1 12	19.23	1.015	0.699	0.0527658	3.6e-06	0.0363413	2.2e-06			-0.221167	0.110626	-0.396406	0.107695
GJ-1 13	19.26	1.016	0.6998	0.0527708	3.3e-06	0.0363412	1.9e-06			-0.156735	0.112519	-0.417042	0.101617
GJ-1 14	19.32	1.02	0.7022	0.0527718	3.4e-06	0.0363438	2.1e-06			-0.137785	0.113583	-0.345503	0.104552
GJ-1 15	19.44	1.026	0.706	0.0527717	3.3e-06	0.0363445	2.2e-06			-0.126414	0.114544	-0.311109	0.109054
GJ-1 16	19	1.003	0.691	0.0527708	3e-06	0.0363409	2.1e-06			-0.143469	0.111543	-0.410164	0.107554
GJ-1 17	19.06	1.006	0.6926	0.052771	3e-06	0.0363422	2.2e-06			-0.121676	0.110428	-0.348255	0.106102
GJ-1 18	19.09	1.007	0.6938	0.0527708	3.5e-06	0.0363444	2.4e-06			-0.125466	0.115592	-0.28772	0.109333
GJ-1 19	18.92	0.998	0.6875	0.0527694	3.3e-06	0.0363429	1.8e-06			-0.20411	0.110425	-0.360636	0.100228
GJ-1 20	19.15	1.011	0.696	0.0527733	3.4e-06	0.0363437	2.2e-06			-0.130206	0.111507	-0.338624	0.106098
GJ-1 21	19.15	1.011	0.6961	0.0527712	3.3e-06	0.0363443	2.3e-06			-0.169053	0.107207	-0.356509	0.110602
GJ-1 22	19.12	1.009	0.6948	0.0527694	3.9e-06	0.0363437	2.2e-06			-0.203162	0.114214	-0.373017	0.109052
GJ-1 23	18.7	0.987	0.6795	0.0527692	3.6e-06	0.0363404	2.4e-06			-0.20032	0.110621	-0.466565	0.109333
GJ-1 24	18.86	0.995	0.686	0.05277	3.1e-06	0.0363433	2.2e-06			-0.18516	0.105042	-0.386774	0.106097
GJ-1 25	19.12	1.009	0.695	0.0527705	3.7e-06	0.0363445	2.3e-06			-0.182317	0.115961	-0.38127	0.109257
GJ-1 26	18.97	1.001	0.689	0.0527698	3.4e-06	0.0363437	2.2e-06			-0.195582	0.112615	-0.403281	0.107688
GJ-1 27	18.93	0.999	0.688	0.0527696	3.6e-06	0.036341	2.1e-06			-0.178528	0.117745	-0.500949	0.107618
GJ-1 28	18.74	0.989	0.6811	0.0527696	3.3e-06	0.0363438	2e-06			-0.178528	0.114545	-0.423914	0.106164
GJ-1 29	18.78	0.991	0.6827	0.0527692	3.7e-06	0.0363437	2.3e-06			-0.224006	0.116778	-0.426665	0.110668
GJ-1 30	18.64	0.984	0.6775	0.0527734	3.5e-06	0.0363438	2.6e-06			-0.144418	0.114539	-0.423914	0.115587
GJ-1 31	18.4	0.971	0.6687	0.0527715	3.1e-06	0.0363432	2e-06			-0.192739	0.113643	-0.375769	0.114241
GJ-1 32	18.54	0.978	0.6737	0.0527712	3.2e-06	0.0363448	2.3e-06			-0.198424	0.114634	-0.331746	0.118437
GJ-1 33	18.51	0.977	0.6726	0.0527725	3.4e-06	0.0363424	2.3e-06			-0.15105	0.112803	-0.362012	0.115594
GJ-1 34	18.65	0.984	0.678	0.0527733	3.9e-06	0.0363486	2.5e-06			-0.135891	0.11847	-0.191416	0.11869
GJ-1 35	18.34	0.968	0.6664	0.0527731	3.2e-06	0.0363438	2.4e-06			-0.185159	0.108384	-0.319363	0.112271
GJ-1 36	18.65	0.984	0.6778	0.0527746	4e-06	0.0363443	2.4e-06			-0.156736	0.117537	-0.305606	0.11227
GJ-1 37	18.37	0.969	0.6676	0.0527751	3.5e-06	0.0363448	2.2e-06			-0.154841	0.118753	-0.385396	0.116984
GJ-1 38	18.5	0.976	0.6723	0.0527756	3.4e-06	0.0363467	2e-06			-0.145367	0.117705	-0.333122	0.114232
GJ-1 39	18.83	0.994	0.6843	0.0527731	3.4e-06	0.0363459	2.3e-06			-0.179474	0.114695	-0.415656	0.116979
GJ-1 40	18.6	0.982	0.6762	0.0527725	3.4e-06	0.0363466	2.2e-06			-0.190844	0.114695	-0.396398	0.115513
GJ-1 41	18.69	0.987	0.6794	0.0527792	3.2e-06	0.0363507	2.1e-06			-0.159579	0.108175	-0.326245	0.107533
GJ-1 42	19.04	1.005	0.6923	0.0527841	2.8e-06	0.0363528	2.2e-06			-0.0667385	0.104115	-0.268474	0.109034
GJ-1 43	20.95	1.106	0.761	0.0527785	3.1e-06	0.0363521	2.6e-06			-0.165263	0.106099	-0.294609	0.118481
GJ-1 44	20.24	1.068	0.736	0.0527739	3.2e-06	0.0363499	2.1e-06			-0.25242	0.107162	-0.35513	0.110724
GJ-1 45	19.69	1.039	0.7158	0.0527711	2.9e-06	0.0363473	1.9e-06			-0.188002	0.104061	-0.342751	0.104977
Tanz 01	18.94	1	0.6889	0.0528016	3.1e-06	0.0363783	2.1e-06			-0.111286	0.108137	-0.388103	0.104458
Tanz 02	18.79	0.992	0.6835	0.0527981	3.4e-06	0.0363795	2.5e-06			-0.200303	0.109308	-0.415586	0.115219
Tanz 03	18.87	0.996	0.6866	0.0528003	2.3e-06	0.0363807	2.2e-06			-0.158636	0.0984833	-0.382603	0.110498
Tanz 04	19.01	1.004	0.6915	0.0528012	2.9e-06	0.036384	1.9e-06			-0.116968	0.100806	-0.305643	0.103176
Tanz 05	18.87	0.996	0.6865	0.0527993	3.2e-06	0.036382	2.3e-06			-0.152954	0.104012	-0.360614	0.109155
Tanz 06	18.94	1	0.6891	0.0527972	3.2e-06	0.0363808	2.3e-06			-0.18894	0.10506	-0.382603	0.103179
Tanz 07	18.98	1.002	0.6905	0.0527977	3.4e-06	0.036381	2.3e-06			-0.17947	0.10729	-0.377106	0.103179
Tanz 08	18.96	1.001	0.6899	0.0527995	3.3e-06	0.036381	2.3e-06			-0.154848	0.106162	-0.344123	0.104671
Tanz 09	18.9	0.998	0.6876	0.0528002	3.2e-06	0.0363827	2.1e-06			-0.14159	0.105058	-0.297396	0.101444
Tanz 10	18.53	0.979	0.6743	0.0527993	3.1e-06	0.0363818	2.1e-06			-0.19178	0.107286	-0.350994	0.107517
Tanz 11	18.66	0.985	0.6789	0.0527996	3.2e-06	0.0363789	2.3e-06			-0.186098	0.108334	-0.430704	0.110568
Tanz 12	18.67	0.986	0.6795	0.0528031	2.8e-06	0.0363852	2e-06			-0.131175	0.108464	-0.319387	0.110763
Tanz 13	18.47	0.975	0.6719	0.0528003	2.6e-06	0.0363851	2.2e-06			-0.184204	0.106664	-0.322135	0.113591
Tanz 14	18.6	0.982	0.6768	0.0527999	2.9e-06	0.0363861	2.3e-06			-0.175682	0.112843	-0.309768	0.113589
Tanz 15	18.79	0.992	0.6837	0.0528013	3.3e-06	0.0363841	2.1e-06			-0.149167	0.116717	-0.364735	0.110626
Tanz 16	18.36	0.97	0.6681	0.0528032	3.4e-06	0.0363846	2.2e-06			-0.134963	0.116745	-0.355116	0.110489
Tanz 17	18.51	0.978	0.6737	0.0528019	3.3e-06	0.0363872	2.4e-06			-0.159584	0.115712	-0.283658	0.113587
Tanz 18	18.17	0.959	0.6611	0.0527999	3.4e-06	0.0363836	2.4e-06			-0.245752	0.116743	-0.421074	0.118183
Tanz 19	18.08	0.954	0.6577	0.0528008	3.5e-06	0.036384	2.2e-06			-0.228708	0.117798	-0.410081	0.115205
Tanz 20	17.94	0.947	0.6527	0.0528002	3.5e-06	0.0363806	2.3e-06			-0.259954	0.121867	-0.514513	0.118185
Tanz 21	17.96	0.948	0.6533	0.0528059	3e-06	0.0363831	2.5e-06			-0.152009	0.116984	-0.445807	0.121212
Tanz 22	18.06	0.954	0.6572	0.0528032	3.1e-06	0.0363828	2.2e-06			-0.2003	0.110555	-0.444434	0.112083
Tanz 23	17.83	0.941	0.6487	0.0528021	3.6e-06	0.0363857	2.5e-06			-0.221132	0.115862	-0.364734	0.116735
Tanz 24	18.03	0.952	0.6559	0.0527991	3.5e-06	0.0363822	2.3e-06			-0.271317	0.112552	-0.511758	0.112013
Tanz 25	18.04	0.952	0.6563	0.0528006	3.8e-06	0.0363847	2.5e-06			-0.242911	0.115988	-0.443055	0.115202
Tanz 26	18.25	0.964	0.6641	0.0527998	3.5e-06	0.036384	2.3e-06			-0.28173	0.113517	-0.518618	0.109139
Tanz 27	18.32	0.967	0.6666	0.0528029	3.2e-06	0.0363837	2.4e-06			-0.223025	0.110294	-0.526862	0.110754
Tanz 28	18.39	0.971	0.6691	0.0528023	3e-06	0.0363839	2e-06			-0.241961	0.107143	-0.529608	0.102941
Tanz 29	18.6	0.982	0.6767	0.0528009	3.6e-06	0.036387	2.3e-06			-0.270367	0.115582	-0.459534	0.108996
Tanz 30	18.76	0.991	0.6826	0.0528009	2.8e-06	0.0363859	2.3e-06			-0.294036	0.111922	-0.525477	0.106045
Tanz 31	18.89	0.997	0.6874	0.0528032	3.3e-06	0.036388	2.3e-06			-0.232492	0.114723	-0.458157	0.107564
Tanz 32	18.8	0.993	0.6841	0.0528028	3e-06	0.0363861	2.3e-06			-0.226812	0.108259	-0.482891	0.112004
Tanz 33	18.91	0.998	0.688	0.0528032	3.4e-06	0.0363874	2.1e-06			-0.219237	0.112419	-0.447168	0.108995
Tanz 34	18.9	0.998	0.6878	0.0528026	3.4e-06	0.0363877	2.3e-06			-0.237227	0.117641	-0.437551	0.116658
Tanz 35	19.17	1.012	0.697	0.0528043	3.4e-06	0.0363896	2.5e-06			-0.242905	0.112735	-0.41007	0.118294
Tanz 36	19.12	1.01	0.6959	0.0528047	3.2e-06	0.0363883	2.1e-06			-0.235331	0.110615	-0.445792	0.112269
Tanz 37	19.21	1.014	0.6991	0.0528038	3.1e-06	0.0363884	2.1e-06			-0.277935	0.108419	-0.492498	0.104425
Tanz 38	19.08	1.007	0.6942	0.0528063	2.8e-06	0.0363887	2e-06			-0.230595	0.10545	-0.484255	0.102932
Tanz 39	18.86	0.996	0.6862	0.0528037	2.8e-06	0.0363922	2.1e-06			-0.255214	0.116442	-0.445781	0.106032
Tanz 40	18.73	0.989	0.6815	0.0528045	2.9e-06	0.0363887	1.9e-06			-0.240065	0.117316	-0.541945	0.103147
Penglai 01	16.49	0.868	0.5957	0.0526135	2.8e-06	0.0361239	2.5e-06			-0.117729	0.10668	-0.222336	0.128412
Penglai 02	16.59	0.873	0.5992	0.0526158	2.9e-06	0.036125	2.4e-06			-0.074012	0.107639	-0.191881	0.12694
Penglai 03	16.24	0.855	0.5867	0.0526136	3.4e-06	0.0361212	2.9e-06			-0.0711565	0.118018	-0.26663	0.120278
Penglai 04	16.56	0.871	0.5981	0.0526103	2.7e-06	0.0361213	2.2e-06			-0.0730514	0.113611	-0.244479	0.10996
Penglai 05	16.63	0.875	0.6008	0.0526065	3.3e-06	0.0361222	2e-06			-0.145288	0.119201	-0.219561	0.106992
Penglai 06	16.78	0.883	0.6061	0.0526085	2.8e-06	0.0361231	2.3e-06			-0.105367	0.110238	-0.218179	0.118997
Penglai 07	16.69	0.878	0.6029	0.0526085	3.2e-06	0.0361217	2.3e-06			-0.105367	0.114104	-0.256941	0.118998
Penglai 08	16.14	0.849	0.5829	0.0526082	3.1e-06	0.0361185	2.5e-06			-0.11012	0.102369	-0.304006	0.120572
Penglai 09	16.21	0.8527	0.5854	0.0526128	3.2e-06	0.0361213	2.3e-06			-0.0226757	0.103471	-0.226481	0.117478
Penglai 10	16.4	0.863	0.5922	0.0526133	2.9e-06	0.0361203	2e-06			-0.0464418	0.107646	-0.178015	0.102499
Penglai 11	16.4	0.8628	0.5923	0.0526105	2.9e-06	0.036119	2.2e-06			-0.0996669	0.107647	-0.214012	0.105594
Penglai 12	16.76	0.882	0.6054	0.0526176	3e-06	0.0361276	2.8e-06			-0.153845	0.118614	-0.208504	0.12412
Penglai 13	16.56	0.871	0.5981	0.0526136	3.1e-06	0.0361231	2.5e-06			-0.229867	0.119542	-0.333079	0.119116
Penglai 14	16.66	0.877	0.6019	0.0526165	3.6e-06	0.0361251	2.5e-06			-0.133888	0.12155	-0.268023	0.111642
Penglai 15	16.75	0.881	0.6052	0.052615	3.4e-06	0.0361256	2.6e-06			-0.162398	0.119453	-0.254181	0.113378
Penglai 16	16.7	0.8784	0.6031	0.0526143	3.7e-06	0.036126	2.2e-06			-0.155745	0.111251	-0.279098	0.108294
Penglai 17	16.71	0.8793	0.6038	0.0526126	3.5e-06	0.0361282	2.4e-06			-0.188056	0.108889	-0.218197	0.111499
Penglai 18	16.64	0.875	0.601	0.0526109	3e-06	0.0361256	2.4e-06			-0.236522	0.100108	-0.28325	0.118984
Penglai 19	16.57	0.8716	0.5984	0.0526106	3.1e-06	0.0361238	2.5e-06			-0.242224	0.101203	-0.333079	0.120553
Penglai 20	16.71	0.879	0.6037	0.0526081	3.1e-06	0.0361257	2.5e-06			-0.320144	0.108788	-0.297092	0.125135
Penglai 21	16.79	0.883	0.6065	0.0526163	3.1e-06	0.03613	2e-06			-0.164298	0.108783	-0.178058	0.118042
Penglai 22	16.6	0.874	0.5998	0.0526133	2.9e-06	0.0361248	2e-06			-0.228917	0.111975	-0.326159	0.114887
Penglai 23	16.92	0.89	0.6114	0.0526122	2.7e-06	0.0361267	2.2e-06			-0.249823	0.110154	-0.273563	0.117653
Penglai 24	16.66	0.8767	0.602	0.0526139	2.3e-06	0.0361258	2.4e-06			-0.189956	0.103372	-0.338616	0.114349
Penglai 25	16.61	0.874	0.6001	0.0526098	3.2e-06	0.0361232	2.2e-06			-0.267881	0.111689	-0.410587	0.111226
Penglai 26	16.67	0.877	0.6024	0.0526166	2.9e-06	0.0361285	2.2e-06			-0.144342	0.101341	-0.283255	0.109659
Penglai 27	16.53	0.87	0.5971	0.0526164	3.1e-06	0.0361279	2.3e-06			-0.148143	0.103458	-0.299863	0.11122
Penglai 28	16.6	0.873	0.5997	0.052614	3e-06	0.0361263	2.2e-06			-0.208011	0.102388	-0.330312	0.108149
Penglai 29	16.7	0.879	0.6032	0.0526199	2.9e-06	0.036129	2.4e-06			-0.0958781	0.101338	-0.255573	0.111357
Penglai 30	16.53	0.87	0.5972	0.0526141	2.9e-06	0.0361264	2.3e-06			-0.161447	0.112173	-0.319239	0.112899
Penglai 31	16.61	0.874	0.5999	0.0526084	3.3e-06	0.0361217	2.4e-06			-0.269784	0.116101	-0.449341	0.114488
Penglai 32	16.57	0.872	0.5985	0.0526088	3e-06	0.0361247	2.6e-06			-0.290688	0.11211	-0.398129	0.125191
Penglai 33	16.57	0.872	0.5987	0.0526145	3.4e-06	0.0361267	2.4e-06			-0.182354	0.116158	-0.342768	0.12209
Penglai 34	16.57	0.872	0.5985	0.0526147	2.8e-06	0.0361302	2.4e-06			-0.237467	0.103315	-0.284642	0.11643
Penglai 35	16.58	0.872	0.5991	0.0526086	3.1e-06	0.0361263	2.3e-06			-0.353396	0.106368	-0.39259	0.114877
Penglai 36	16.61	0.874	0.6	0.0526153	2.6e-06	0.0361308	2.1e-06			-0.208961	0.10141	-0.191905	0.110147
Penglai 37	16.54	0.87	0.5975	0.0526029	3e-06	0.0361217	2.3e-06			-0.347715	0.108631	-0.337232	0.11599
Penglai 38	16.56	0.871	0.598	0.0526086	3e-06	0.036122	2.1e-06			-0.239375	0.108628	-0.328926	0.113045
Penglai 39	16.46	0.866	0.5945	0.052606	3e-06	0.0361208	2.6e-06			-0.265987	0.112935	-0.34	0.116192
Penglai 40	16.64	0.876	0.6012	0.0526078	3.1e-06	0.0361195	2.3e-06			-0.231774	0.113905	-0.37599	0.111239
Cam-1 01	17.42	0.919	0.6335	0.0527803	3.1e-06	0.0363611	2.3e-06			-0.369845	0.100023	-0.729001	0.110599
Cam-1 02	17.53	0.925	0.6376	0.0527829	3e-06	0.0363634	2.3e-06			-0.320594	0.0989209	-0.665771	0.110597
Cam-1 03	17.92	0.946	0.6517	0.0527925	2.6e-06	0.0363703	2.5e-06			-0.221141	0.0978347	-0.565408	0.110858
Cam-1 04	17.93	0.946	0.6521	0.0527897	3.1e-06	0.0363699	2.1e-06			-0.274176	0.10293	-0.576403	0.104396
Cam-1 05	18.14	0.957	0.6596	0.0527768	3.1e-06	0.0363631	2.2e-06			-0.516623	0.105077	-0.727605	0.105951
Cam-1 06	17.94	0.947	0.6523	0.0527885	3.2e-06	0.0363699	2.3e-06			-0.295012	0.10614	-0.540675	0.107538
Cam-1 07	18.17	0.959	0.6606	0.0527867	3.3e-06	0.0363662	2.2e-06			-0.373608	0.108214	-0.620402	0.105949
Cam-1 08	18.07	0.954	0.6571	0.0527937	3.4e-06	0.0363733	2.4e-06			-0.241026	0.109315	-0.42522	0.109175
Cam-1 09	18.14	0.958	0.6597	0.0527862	3.7e-06	0.0363665	2.3e-06			-0.447458	0.111751	-0.650629	0.10754
Cam-1 10	18.07	0.954	0.6574	0.0527962	3.3e-06	0.0363744	2.1e-06			-0.258067	0.107154	-0.433464	0.104394
Cam-1 11	18.1	0.955	0.6582	0.0527834	2.7e-06	0.0363656	2e-06			-0.476821	0.107762	-0.695979	0.104471
Cam-1 12	17.93	0.947	0.6522	0.0527905	3.2e-06	0.0363694	2.3e-06			-0.34235	0.112563	-0.591522	0.109036
Cam-1 13	17.7	0.934	0.6437	0.0527833	3.2e-06	0.0363637	2.3e-06			-0.442739	0.113569	-0.742712	0.110522
Cam-1 14	17.89	0.944	0.6505	0.0527841	3.3e-06	0.0363671	2.2e-06			-0.427587	0.114591	-0.64925	0.108968
Cam-1 15	18.08	0.954	0.6574	0.0527849	2.7e-06	0.036364	2.2e-06			-0.43421	0.10001	-0.78255	0.106016
Cam-1 16	18.05	0.953	0.6564	0.0527861	3.1e-06	0.0363686	2.2e-06			-0.411483	0.104089	-0.656107	0.106012
Cam-1 17	18.21	0.961	0.6624	0.0527843	3.1e-06	0.0363696	2.5e-06			-0.485335	0.0998669	-0.651976	0.106652
Cam-1 18	17.88	0.944	0.6502	0.0527886	3e-06	0.0363695	2.4e-06			-0.403897	0.098762	-0.654725	0.104901
Cam-1 19	17.96	0.948	0.6531	0.0527867	2.8e-06	0.0363674	2.4e-06			-0.445562	0.0946065	-0.676727	0.106372
Cam-1 20	17.95	0.948	0.6529	0.0527878	2.6e-06	0.0363701	2.3e-06			-0.424729	0.0925349	-0.602509	0.104685
Cam-1 21	17.82	0.941	0.6483	0.0527911	3.2e-06	0.0363715	1.8e-06			-0.28459	0.101028	-0.500814	0.113116
Cam-1 22	17.8	0.94	0.6475	0.052789	3.3e-06	0.0363717	2.2e-06			-0.324364	0.102177	-0.495316	0.118341
Cam-1 23	17.67	0.933	0.6426	0.0527827	3.1e-06	0.0363668	2.6e-06			-0.417179	0.107302	-0.63139	0.119966
Cam-1 24	17.54	0.926	0.6377	0.0527864	3e-06	0.0363673	2.1e-06			-0.347098	0.106275	-0.617645	0.112316
Cam-1 25	17.54	0.926	0.638	0.05279	3e-06	0.0363706	2.2e-06			-0.29122	0.109317	-0.481578	0.112115
Cam-1 26	17.57	0.928	0.6391	0.052793	2.9e-06	0.0363722	2.3e-06			-0.234398	0.108343	-0.437592	0.11362
Cam-1 27	17.62	0.93	0.6409	0.0527854	2.8e-06	0.0363688	2.5e-06			-0.354676	0.100996	-0.474713	0.118225
Cam-1 28	17.66	0.932	0.6421	0.0527841	3.2e-06	0.0363662	2.1e-06			-0.412438	0.100997	-0.598415	0.113824
Cam-1 29	17.73	0.936	0.6447	0.0527938	3e-06	0.0363706	2.3e-06			-0.228716	0.0987631	-0.477455	0.116706
Cam-1 30	17.68	0.933	0.6428	0.0527887	2.8e-06	0.0363666	2.2e-06			-0.363186	0.0987633	-0.645132	0.110928
Cam-1 31	17.63	0.931	0.6413	0.0527953	2.9e-06	0.0363688	2.2e-06			-0.238183	0.0997897	-0.584655	0.110926
Cam-1 32	17.62	0.93	0.6407	0.0527896	2.9e-06	0.0363691	2.4e-06			-0.312053	0.100814	-0.488456	0.106307
Cam-1 33	17.69	0.934	0.6432	0.0527848	3.2e-06	0.0363661	2.3e-06			-0.331952	0.104028	-0.513208	0.10762
Cam-1 34	17.85	0.942	0.6492	0.0527836	2.9e-06	0.0363662	2.7e-06			-0.384036	0.10514	-0.584673	0.115772
Cam-1 35	17.8	0.939	0.6471	0.0527826	2.9e-06	0.0363664	2.3e-06			-0.402977	0.10514	-0.579175	0.109045
Cam-1 36	17.88	0.944	0.6504	0.0527869	3e-06	0.0363687	2.5e-06			-0.349937	0.111496	-0.554424	0.115373
Cam-1 37	17.75	0.937	0.6458	0.0527899	2.9e-06	0.0363725	1.9e-06			-0.293114	0.110541	-0.449961	0.106369
Cam-1 38	17.82	0.941	0.6482	0.0527844	3.1e-06	0.0363648	2.4e-06			-0.360361	0.106582	-0.60667	0.11665
Cam-1 39	17.91	0.945	0.6514	0.0527931	2.9e-06	0.0363728	1.8e-06			-0.195571	0.104537	-0.386736	0.108169
Cam-1 40	17.84	0.942	0.6488	0.0527861	3.2e-06	0.0363678	2.4e-06			-0.343311	0.107635	-0.517323	0.113628
Cam-2 01	18.51	0.977	0.673	0.0527902	2.7e-06	0.0363694	2.3e-06			-0.27891	0.108973	-0.500824	0.115111
Cam-2 02	18.66	0.985	0.6784	0.0527835	2.7e-06	0.0363635	2.2e-06			-0.497647	0.100954	-0.750958	0.110521
Cam-2 03	18.7	0.987	0.6802	0.052792	2.8e-06	0.0363705	2.2e-06			-0.384948	0.10192	-0.621742	0.106009
Cam-2 04	18.63	0.983	0.677	0.0527805	2.9e-06	0.0363616	2.1e-06			-0.620721	0.108438	-0.858135	0.102906
Cam-2 05	18.38	0.97	0.668	0.0527885	2.9e-06	0.0363673	2e-06			-0.469218	0.108434	-0.701458	0.101383
Cam-2 06	18.44	0.973	0.6705	0.0527764	3e-06	0.0363601	2.1e-06			-0.598985	0.107434	-0.788093	0.102914
Cam-2 07	18.33	0.968	0.6667	0.0527878	3.2e-06	0.0363659	2e-06			-0.383072	0.109479	-0.628649	0.101391
Cam-2 08	18.59	0.981	0.6758	0.0527726	3.4e-06	0.0363567	2.2e-06			-0.589549	0.109431	-0.837597	0.106032
Cam-2 09	18.48	0.975	0.6719	0.0527826	3.2e-06	0.0363648	2.3e-06			-0.400137	0.107237	-0.614916	0.107617
Cam-2 10	18.59	0.981	0.6761	0.0527813	3.3e-06	0.0363652	2.2e-06			-0.401089	0.11674	-0.61079	0.110526
Cam-2 11	18.35	0.969	0.667	0.0527841	3.3e-06	0.0363656	2.3e-06			-0.348052	0.116738	-0.599793	0.112054
Cam-2 12	18.71	0.987	0.6803	0.0527735	3.2e-06	0.0363579	2.3e-06			-0.565875	0.116773	-0.856814	0.115119
Cam-2 13	18.66	0.985	0.6787	0.0527909	3.1e-06	0.036365	2.2e-06			-0.236295	0.115791	-0.661634	0.113624
Cam-2 14	18.67	0.986	0.6791	0.0527859	3.7e-06	0.036366	2e-06			-0.432312	0.11484	-0.73307	0.114012
Cam-2 15	18.63	0.984	0.6777	0.0527896	3.2e-06	0.0363669	2.5e-06			-0.415253	0.111583	-0.723443	0.12276
Cam-2 16	18.55	0.979	0.6744	0.0527898	3.3e-06	0.0363672	2.2e-06			-0.411466	0.112623	-0.715197	0.118337
Cam-2 17	18.72	0.988	0.6809	0.0527923	3.2e-06	0.0363721	2.1e-06			-0.360332	0.112558	-0.584633	0.110849
Cam-2 18	18.7	0.987	0.6801	0.0527831	3.1e-06	0.0363657	2.2e-06			-0.516582	0.104997	-0.767418	0.11065
Cam-2 19	18.48	0.976	0.672	0.0527905	3e-06	0.0363672	2.2e-06			-0.376434	0.103945	-0.726188	0.110649
Cam-2 20	18.59	0.981	0.6761	0.052779	3.3e-06	0.0363611	2.2e-06			-0.590445	0.108215	-0.847153	0.112116
Cam-2 21	18.42	0.972	0.67	0.0527866	3.5e-06	0.036366	2e-06			-0.446509	0.110442	-0.712462	0.109242
Cam-2 22	18.33	0.967	0.6663	0.0527768	2.9e-06	0.0363594	2.3e-06			-0.61318	0.105069	-0.860914	0.112054
Cam-2 23	18.29	0.966	0.6653	0.052786	2.8e-06	0.0363638	2.3e-06			-0.438938	0.104086	-0.739963	0.11205
Cam-2 24	18.24	0.963	0.663	0.0527834	3.1e-06	0.0363649	2.3e-06			-0.447472	0.106038	-0.69049	0.11205
Cam-2 25	18.12	0.957	0.659	0.0527851	3.8e-06	0.0363622	2.2e-06			-0.415274	0.113918	-0.764711	0.110523
Cam-2 26	18.3	0.966	0.6653	0.0527797	3e-06	0.0363601	2.6e-06			-0.575295	0.112947	-0.897993	0.126585
Cam-2 27	18.15	0.958	0.66	0.0527894	3.2e-06	0.0363704	2.3e-06			-0.391586	0.114894	-0.614873	0.122105
Cam-2 28	18.27	0.964	0.6643	0.052784	3.1e-06	0.0363641	2.5e-06			-0.58094	0.125912	-0.821012	0.143924
Cam-2 29	18.04	0.952	0.656	0.0527946	2.9e-06	0.0363727	2e-06			-0.380205	0.124185	-0.584629	0.137881
Cam-2 30	18.55	0.979	0.6745	0.052779	3.9e-06	0.036364	2.2e-06			-0.474006	0.132411	-0.628664	0.128257
Cam-2 31	18.45	0.974	0.6712	0.0527841	3.2e-06	0.0363673	2.2e-06			-0.377406	0.125491	-0.537941	0.128254
Cam-2 32	18.52	0.977	0.6734	0.0527823	3.3e-06	0.0363655	2.2e-06			-0.547825	0.112342	-0.755056	0.108966
Cam-2 33	18.51	0.977	0.6732	0.0527904	3.9e-06	0.0363717	2.3e-06			-0.394422	0.119036	-0.584636	0.11051
Cam-2 34	18.34	0.968	0.667	0.0527842	3e-06	0.036366	2e-06			-0.624475	0.113773	-0.871807	0.107593
Cam-2 35	18.15	0.958	0.6601	0.0527867	3.3e-06	0.0363703	2.2e-06			-0.577134	0.116714	-0.753628	0.110501
Ban-1 01	15.47	0.815	0.5604	0.0526913	3.1e-06	0.0362353	2.4e-06			-0.211751	0.10539	-0.421406	0.11558
Ban-1 02	15.27	0.805	0.5535	0.052689	3.2e-06	0.0362358	2.9e-06			-0.2554	0.106462	-0.407608	0.124004
Ban-1 03	15.02	0.7917	0.5445	0.0526955	3.2e-06	0.0362421	2.3e-06			-0.134891	0.119466	-0.271015	0.110897
Ban-1 04	15.08	0.795	0.5465	0.052696	3e-06	0.0362442	2.4e-06			-0.168102	0.119643	-0.316547	0.122218
Ban-1 05	15.19	0.8	0.5504	0.0526905	3.5e-06	0.0362445	2.6e-06			-0.272475	0.124442	-0.30827	0.125293
Ban-1 06	14.94	0.7875	0.5417	0.0526948	3.5e-06	0.0362461	2.8e-06			-0.22598	0.117837	-0.397934	0.134087
Ban-1 07	14.82	0.7812	0.5374	0.0526984	3.6e-06	0.0362493	2.3e-06			-0.157666	0.118914	-0.309654	0.126639
Ban-1 08	15.08	0.795	0.5467	0.0526957	2.8e-06	0.0362474	2.5e-06			-0.190874	0.112041	-0.364829	0.127867
Ban-1 09	14.97	0.7887	0.5425	0.0526948	3.2e-06	0.0362449	2.4e-06			-0.207953	0.115834	-0.433798	0.126403
Ban-1 10	14.79	0.7794	0.5361	0.0526965	3.9e-06	0.0362471	2.4e-06			-0.166205	0.124321	-0.373105	0.123353
Ban-1 11	14.77	0.778	0.5352	0.0526956	3e-06	0.0362457	2.7e-06			-0.183284	0.114976	-0.411728	0.127988
Ban-1 12	14.49	0.764	0.5254	0.0527004	3.6e-06	0.0362478	2.4e-06			-0.109276	0.121014	-0.357932	0.120101
Ban-1 13	14.25	0.7507	0.5164	0.0526977	3.3e-06	0.0362486	2.5e-06			-0.160512	0.117896	-0.335862	0.121643
Ban-1 14	14.37	0.757	0.5208	0.052699	3.1e-06	0.0362496	2.4e-06			-0.135843	0.124014	-0.327586	0.118599
Ban-1 15	14.09	0.742	0.5106	0.0526987	3.4e-06	0.0362488	3e-06			-0.141535	0.126814	-0.349655	0.128576
Ban-1 16	14	0.738	0.5077	0.0527015	3.3e-06	0.036252	2.3e-06			-0.0836572	0.124838	-0.330345	0.11872
Ban-1 17	14.06	0.741	0.5098	0.0526989	3.3e-06	0.0362516	2.5e-06			-0.132996	0.124839	-0.341379	0.121758
Ban-1 18	19.87	1.0485	0.7222	0.0527735	3.5e-06	0.0363496	2.4e-06			-0.142523	0.110486	-0.279473	0.112459
Ban-1 19	18.62	0.983	0.677	0.0527731	3.4e-06	0.0363491	2.3e-06			-0.176632	0.111375	-0.323493	0.110864
Ban-1 20	18.73	0.989	0.6809	0.0527744	3.1e-06	0.0363516	2e-06			-0.151999	0.108185	-0.254714	0.106368
Ban-1 21	18.48	0.975	0.6718	0.0527748	3.1e-06	0.0363499	2e-06			-0.226842	0.111465	-0.401895	0.10931
Ban-1 22	18.54	0.979	0.674	0.0527754	2.7e-06	0.0363501	2.4e-06			-0.215474	0.107663	-0.396393	0.115242
Ban-1 23	18.57	0.98	0.675	0.0527799	2.9e-06	0.0363507	2.1e-06			-0.207892	0.117369	-0.459653	0.104527
Ban-1 24	18.5	0.977	0.6726	0.0527782	2.9e-06	0.0363525	2.2e-06			-0.2401	0.11737	-0.410142	0.10607
Ban-1 25	18.28	0.965	0.6647	0.0527835	3e-06	0.0363541	2.3e-06			-0.117898	0.119341	-0.319369	0.107665
Ban-1 26	18.41	0.972	0.6694	0.0527779	3e-06	0.0363508	2e-06			-0.223997	0.119343	-0.410145	0.103035
Ban-1 27	18.32	0.967	0.6659	0.0527731	3.5e-06	0.0363499	2.2e-06			-0.206002	0.118753	-0.389516	0.106079
Ban-1 28	17.83	0.941	0.648	0.0527716	3.1e-06	0.0363475	2.3e-06			-0.234424	0.114693	-0.455538	0.107674
Ban-1 29	17.79	0.939	0.6468	0.0527745	3e-06	0.0363485	2.1e-06			-0.206948	0.109353	-0.43353	0.101448
Ban-1 30	17.85	0.942	0.6489	0.0527777	2.6e-06	0.036352	2.3e-06			-0.146315	0.10561	-0.337249	0.104676
Ban-1 31	17.97	0.948	0.6532	0.0527794	3e-06	0.0363536	2.2e-06			-0.167158	0.112789	-0.315243	0.109305
Ban-1 32	18.01	0.95	0.6546	0.0527822	2.9e-06	0.0363543	2.3e-06			-0.114107	0.111844	-0.295987	0.110851
Ban-1 33	18.01	0.95	0.6546	0.0527781	2.7e-06	0.0363526	2.3e-06			-0.157684	0.107995	-0.346877	0.112243
Ban-1 34	17.92	0.946	0.6514	0.0527778	2.9e-06	0.036353	2.2e-06			-0.163368	0.109841	-0.335874	0.110716
Ban-1 35	17.97	0.949	0.6534	0.052775	2.9e-06	0.0363562	2e-06			-0.200316	0.106306	-0.251974	0.10144
Ban-1 36	18.03	0.952	0.6555	0.0527763	3e-06	0.0363566	2.2e-06			-0.175684	0.107297	-0.240971	0.104525
Ban-1 37	18.17	0.959	0.6607	0.0527818	3.2e-06	0.0363591	2.4e-06			-0.126422	0.104734	-0.272612	0.109292
Ban-1 38	17.88	0.943	0.6499	0.0527795	2.9e-06	0.0363538	2.3e-06			-0.17	0.101551	-0.41839	0.107659
Ban-1 39	18.13	0.957	0.6592	0.0527799	2.7e-06	0.0363564	2.3e-06			-0.233467	0.105921	-0.432135	0.112092
Ban-1 40	18.17	0.959	0.6606	0.0527792	2.7e-06	0.0363576	2.3e-06			-0.246729	0.105922	-0.399131	0.112091
Qinghu-1 01	15.87	0.836	0.575	0.052699	3e-06	0.0362528	2.9e-06			-0.211745	0.109596	-0.414471	0.134119
Qinghu-1 02	15.75	0.83	0.571	0.0526998	3.4e-06	0.0362536	2.8e-06			-0.196565	0.113723	-0.392406	0.132491
Qinghu-1 03	15.65	0.825	0.567	0.0526955	3.4e-06	0.036252	2.6e-06			-0.275311	0.113726	-0.516511	0.129348
Qinghu-2 01	15.82	0.833	0.573	0.0526993	3.3e-06	0.036256	3.2e-06			-0.203206	0.112658	-0.406192	0.139202
Qinghu-2 02	16	0.843	0.58	0.0526964	3.5e-06	0.0362548	3.1e-06			-0.266771	0.113725	-0.487545	0.138926
Qinghu-3 01	16.06	0.847	0.582	0.0526983	3.7e-06	0.0362509	3.6e-06			-0.230719	0.115981	-0.595101	0.147822
Qinghu-3 02	15.79	0.832	0.573	0.0526976	3.3e-06	0.0362548	3e-06			-0.303764	0.11465	-0.472379	0.143532
Qinghu-4 01	15.72	0.829	0.57	0.0526975	3.6e-06	0.0362503	3.1e-06			-0.305662	0.117856	-0.596484	0.145146
Qinghu-4 02	15.66	0.825	0.568	0.0526987	2.9e-06	0.0362486	2.8e-06			-0.302813	0.108517	-0.606146	0.137589
Qinghu-5 01	15.64	0.824	0.567	0.0527059	3.3e-06	0.0362573	3.1e-06			-0.166205	0.112552	-0.366201	0.142387
Qinghu-5 02	15.69	0.827	0.569	0.0527004	3.7e-06	0.0362504	3.1e-06			-0.242101	0.119086	-0.542715	0.134571
Qinghu-6 01	16.2	0.854	0.587	0.0527005	3e-06	0.0362535	2.6e-06			-0.213641	0.108785	-0.512367	0.13095
Qinghu-6 02	16.24	0.856	0.589	0.0527005	3e-06	0.0362549	2.7e-06			-0.213641	0.108785	-0.473757	0.132479
Qinghu-7 01	16.4	0.864	0.595	0.0526972	2.9e-06	0.0362494	2.7e-06			-0.263924	0.103165	-0.618548	0.138768
Qinghu-7 02	16.43	0.866	0.596	0.0526944	2.7e-06	0.0362458	2.7e-06			-0.317053	0.101193	-0.717832	0.138772
Qinghu-8 01	16.52	0.871	0.599	0.0526985	3.2e-06	0.036251	2.8e-06			-0.226924	0.110431	-0.486181	0.130642
Qinghu-8 02	16.28	0.858	0.59	0.0526971	2.7e-06	0.0362501	3e-06			-0.253489	0.105512	-0.511005	0.133979
Qinghu-9 01	16.36	0.862	0.593	0.0526976	3.2e-06	0.0362497	2.8e-06			-0.217438	0.112565	-0.516522	0.120843
Qinghu-9 02	16.1	0.849	0.584	0.0527006	2.8e-06	0.0362559	2.8e-06			-0.160512	0.108656	-0.345516	0.120835
Qinghu-10 01	16.32	0.86	0.592	0.0527013	3.2e-06	0.0362534	2.7e-06			-0.188975	0.110494	-0.469626	0.123327
Qinghu-10 02	16.16	0.852	0.586	0.0527018	2.7e-06	0.0362517	3e-06			-0.179487	0.105578	-0.516512	0.128496
Qinghu-10 03	15.79	0.832	0.573	0.0526986	3e-06	0.0362539	2.6e-06			-0.312299	0.104115	-0.502715	0.121677
Qinghu-11 01	15.88	0.837	0.576	0.0526999	2.9e-06	0.0362572	3.2e-06			-0.287633	0.103089	-0.411705	0.132104
Qinghu-12 01	15.87	0.836	0.575	0.0526965	3.7e-06	0.0362567	2.9e-06			-0.303767	0.109053	-0.410327	0.123936
Qinghu-12 02	15.77	0.831	0.572	0.0526973	3e-06	0.0362562	2.7e-06			-0.288588	0.101012	-0.424116	0.12045
Qinghu-13 01	15.56	0.82	0.564	0.0526961	3.1e-06	0.036253	3.2e-06			-0.328431	0.103163	-0.637818	0.129428
Qinghu-13 02	15.63	0.823	0.566	0.0526988	3.3e-06	0.0362535	2.9e-06			-0.277202	0.105372	-0.62403	0.123932
Qinghu-14 01	16.13	0.85	0.585	0.0526979	3.7e-06	0.0362526	3.1e-06			-0.342653	0.112908	-0.720518	0.134664
Qinghu-15 01	16.14	0.851	0.585	0.0527025	3.3e-06	0.03626	3.1e-06			-0.255378	0.108348	-0.516472	0.134653
Qinghu-16 01	15.92	0.839	0.577	0.0527013	3.6e-06	0.0362583	3.2e-06			-0.317982	0.111733	-0.584022	0.13778
Qinghu-17 01	15.94	0.84	0.578	0.0527048	3.1e-06	0.0362615	2.9e-06			-0.276241	0.104141	-0.470976	0.129614
Qinghu-18 01	15.89	0.837	0.576	0.0527038	2.9e-06	0.036256	2.7e-06			-0.295212	0.102046	-0.622632	0.126293
Qinghu-18 02	17.26	0.91	0.626	0.0527043	2.9e-06	0.0362618	2.7e-06			-0.285727	0.104279	-0.37447	0.124808
Qinghu-19 01	16.18	0.853	0.587	0.052705	3e-06	0.0362592	2.8e-06			-0.315126	0.112798	-0.535774	0.123551
Qinghu-20 01	15.56	0.82	0.564	0.0527027	3.2e-06	0.0362572	3.7e-06			-0.358759	0.114761	-0.590922	0.140412
Qinghu-21 01	16.05	0.846	0.582	0.0527045	3.1e-06	0.0362578	3e-06			-0.339786	0.110737	-0.677744	0.131563
Qinghu-22 01	16.09	0.848	0.583	0.0527015	3.2e-06	0.0362574	3.1e-06			-0.396697	0.111758	-0.688773	0.133315
LZK-1-1 01	13.89	0.732	0.503	0.052688	4e-06	0.0362446	3.1e-06			-0.674604	0.120452	-0.902526	0.128909
LZK-1-1 02	14	0.738	0.508	0.052691	3.8e-06	0.0362457	3.1e-06			-0.617694	0.118094	-0.872194	0.128907
LZK-1-1 03	13.5	0.711	0.489	0.0526984	3e-06	0.0362509	2.9e-06			-0.533257	0.108369	-0.855583	0.128295
LZK-1-1 04	13.87	0.731	0.503	0.0527021	3.4e-06	0.0362595	3e-06			-0.463071	0.112539	-0.61847	0.130021
LZK-1-1 05	13.83	0.729	0.501	0.0527118	3.7e-06	0.0362627	2.6e-06			-0.372949	0.118961	-0.556429	0.134241
LZK-1-1 06	14.04	0.74	0.509	0.0527051	3.2e-06	0.0362602	2.9e-06			-0.50003	0.113627	-0.625355	0.138839
LZK-1-2 01	13.94	0.735	0.505	0.0527018	3.7e-06	0.0362544	3.1e-06			-0.517116	0.126464	-0.709474	0.143512
LZK-1-2 02	14.1	0.743	0.511	0.0527048	3.1e-06	0.036257	2.7e-06			-0.460212	0.120515	-0.637785	0.137222
LZK-1-2 03	14.24	0.75	0.516	0.0526986	3.8e-06	0.0362536	3.3e-06			-0.52093	0.128531	-0.730154	0.139569
LZK-1-2 04	14.36	0.757	0.521	0.0527069	3.4e-06	0.036256	2.7e-06			-0.363486	0.124426	-0.663979	0.129382
LZK-1-2 05	14.54	0.766	0.527	0.0527079	3.7e-06	0.0362621	2.8e-06			-0.313222	0.127472	-0.572971	0.132561
LZK-1-2 06	14.3	0.754	0.519	0.0527138	3.7e-06	0.0362577	2.8e-06			-0.2013	0.127468	-0.694282	0.132567
LZK-1-2 07	14.53	0.766	0.527	0.0527071	4.3e-06	0.0362599	3.2e-06			-0.368226	0.13312	-0.687371	0.143548
LZK-1-2 08	14.47	0.763	0.525	0.0527052	3.7e-06	0.0362614	3.3e-06			-0.404267	0.126465	-0.646017	0.145257
LZK-1-2 09	14.41	0.759	0.522	0.0527005	3.7e-06	0.0362549	3.2e-06			-0.569267	0.118972	-0.85966	0.142089
LZK-1-2 10	14.48	0.763	0.525	0.0526989	3.8e-06	0.0362562	3.1e-06			-0.599616	0.120102	-0.823821	0.140391
LZK-1-2 11	14.74	0.777	0.534	0.0527042	3.9e-06	0.0362613	2.9e-06			-0.453578	0.116327	-0.634993	0.137099
LZK-1-3 01	14.37	0.757	0.521	0.0526972	3.7e-06	0.0362549	3.3e-06			-0.586357	0.113957	-0.811438	0.143823
LZK-1-3 02	14.35	0.756	0.52	0.0527124	3.2e-06	0.0362657	3.4e-06			-0.359673	0.110589	-0.583973	0.149957
LZK-1-3 03	14.31	0.754	0.519	0.0527147	3.7e-06	0.0362644	3.4e-06			-0.316048	0.116065	-0.619811	0.149959
LZK-1-3 04	14.18	0.747	0.514	0.0527068	3.4e-06	0.0362606	2.8e-06			-0.572063	0.113683	-0.8582	0.144921
LZK-1-3 05	14.25	0.751	0.517	0.0527082	3.6e-06	0.0362584	2.8e-06			-0.437439	0.119237	-0.797615	0.14186
LZK-1-3 06	15.28	0.805	0.554	0.0527049	4.2e-06	0.0362631	3.3e-06			-0.469693	0.130799	-0.61293	0.145254
LZK-1-4 01	13.83	0.729	0.502	0.052695	3.8e-06	0.0362535	3.1e-06			-0.657475	0.126326	-0.87759	0.141877
LZK-1-4 02	14.67	0.773	0.532	0.0527075	4e-06	0.0362624	3.6e-06			-0.523714	0.128512	-0.764502	0.150566
LZK-1-4 03	13.96	0.736	0.506	0.0527116	3.8e-06	0.0362636	3.2e-06			-0.445954	0.126305	-0.731424	0.14353
LZK-1-4 04	14.11	0.744	0.512	0.0527136	3.9e-06	0.0362687	3.2e-06			-0.417503	0.127395	-0.581197	0.140635
LZK-1-4 05	13.97	0.736	0.507	0.0527116	4e-06	0.036264	2.8e-06			-0.455434	0.128508	-0.710754	0.133997
LZK-1-4 06	14	0.738	0.508	0.052705	4e-06	0.0362608	3e-06			-0.552171	0.12442	-0.804473	0.142067
LZK-1-4 07	13.97	0.736	0.507	0.0527065	3e-06	0.0362613	3e-06			-0.523721	0.113842	-0.790691	0.142067
LZK-1-4 08	13.99	0.737	0.507	0.0527084	3.8e-06	0.0362638	3e-06			-0.377704	0.118073	-0.669421	0.144928
LZK-1-4 09	13.92	0.734	0.505	0.0527042	3.7e-06	0.0362604	2.7e-06			-0.457371	0.116927	-0.763148	0.140374
LZK-1-4 10	13.79	0.727	0.5	0.0526995	3.1e-06	0.0362555	2.9e-06			-0.373945	0.11508	-0.659849	0.141779
LZK-1-4 11	13.65	0.72	0.495	0.0527046	3.8e-06	0.0362605	3.1e-06			-0.27719	0.122399	-0.521983	0.144956
LZK-1-5 01	14.93	0.787	0.542	0.0527331	3.4e-06	0.0362882	2.7e-06			-0.43447	0.120978	-0.673331	0.141975
LZK-1-5 02	14.94	0.788	0.542	0.0527336	3.3e-06	0.0362902	2.6e-06			-0.424991	0.119978	-0.618235	0.140548
LZK-1-5 03	15.05	0.794	0.546	0.0527287	4.2e-06	0.0362886	2.7e-06			-0.313165	0.131755	-0.532861	0.143501
LZK-1-5 04	15.06	0.794	0.546	0.0527229	3.3e-06	0.0362874	2.8e-06			-0.423147	0.122198	-0.565923	0.144951
LZK-1-5 05	14.93	0.787	0.542	0.0527186	3.8e-06	0.0362809	3.3e-06			-0.391884	0.126293	-0.685792	0.145232
LZK-1-5 06	14.92	0.787	0.542	0.0527213	3.8e-06	0.036287	3.1e-06			-0.406092	0.126286	-0.56868	0.138802
Jilin-1 01	15.85	0.836	0.576	0.0527595	3.7e-06	0.0363306	3.4e-06			-0.300765	0.114808	-0.589039	0.137272
Jilin-1 02	15.93	0.84	0.579	0.0527601	3.3e-06	0.0363306	2.7e-06			-0.289394	0.11034	-0.589039	0.124934
Jilin-1 03	16.04	0.846	0.583	0.052761	3.8e-06	0.0363317	3.1e-06			-0.299814	0.119135	-0.606913	0.135767
Jilin-1 04	16.21	0.855	0.589	0.0527614	3.9e-06	0.0363336	2.8e-06			-0.292234	0.120289	-0.554631	0.130733
Jilin-2 01	15.38	0.812	0.559	0.052761	4e-06	0.0363327	3.1e-06			-0.242018	0.12531	-0.579396	0.135765
Jilin-2 02	15.58	0.822	0.566	0.0527588	3.5e-06	0.0363315	2.7e-06			-0.283712	0.119816	-0.612417	0.129132
Jilin-2 03	15.55	0.821	0.565	0.0527577	3e-06	0.0363315	2.5e-06			-0.274239	0.112632	-0.569775	0.13929
Jilin-3 01	15.6	0.823	0.567	0.0527581	3.9e-06	0.0363295	3.7e-06			-0.266658	0.122136	-0.624811	0.158238
Jilin-3 02	15.36	0.81	0.558	0.0527562	3.7e-06	0.0363298	2.9e-06			-0.33583	0.116828	-0.583542	0.142308
Jilin-3 03	15.37	0.811	0.558	0.0527576	3.4e-06	0.0363294	2.6e-06			-0.309297	0.113505	-0.59455	0.137847
Jilin-3 04	15.33	0.809	0.557	0.0527573	4e-06	0.0363269	3e-06			-0.332984	0.117379	-0.626207	0.131099
Jilin-4 01	17.03	0.898	0.619	0.0527654	4.3e-06	0.0363367	3.7e-06			-0.179476	0.121122	-0.356512	0.143997
Jilin-4 02	15.22	0.803	0.553	0.0527596	4.2e-06	0.0363328	3e-06			-0.306449	0.117987	-0.492731	0.129665
Jilin-4 03	15.1	0.797	0.548	0.052762	3.8e-06	0.0363319	2.6e-06			-0.260966	0.113009	-0.517498	0.122949
Jilin-4 04	15.24	0.804	0.554	0.0527599	3.8e-06	0.0363292	2.8e-06			-0.29129	0.114008	-0.645446	0.124754
Jilin-5 01	15.13	0.798	0.55	0.0527639	3.6e-06	0.0363292	3.4e-06			-0.215484	0.111648	-0.645446	0.13558
Jilin-5 02	15.28	0.806	0.555	0.0527628	4.1e-06	0.0363375	2.9e-06			-0.249595	0.120528	-0.470702	0.126457
Jilin-5 03	15.91	0.84	0.578	0.0527674	3.7e-06	0.0363424	2.6e-06			-0.16242	0.115782	-0.335873	0.12141
Jilin-6 01	15.3	0.807	0.556	0.0527617	3.3e-06	0.0363346	3.5e-06			-0.284653	0.111358	-0.513358	0.141635
Jilin-6 02	15.13	0.798	0.55	0.0527598	3.6e-06	0.0363351	2.8e-06			-0.32066	0.114649	-0.4996	0.129305
Jilin-6 03	15.69	0.828	0.57	0.0527587	3.9e-06	0.0363324	2.6e-06			-0.304557	0.126807	-0.532628	0.137181
Jilin-6 04	15.31	0.808	0.556	0.052764	3.6e-06	0.0363362	2.7e-06			-0.204113	0.123574	-0.428059	0.138632
Jilin-7 01	15.12	0.798	0.549	0.0527638	3.6e-06	0.0363349	3e-06			-0.242961	0.126459	-0.492722	0.147678
Jilin-7 02	15.06	0.795	0.547	0.0527643	3.3e-06	0.0363357	2.9e-06			-0.233486	0.123484	-0.470708	0.146156
Jilin-7 03	15.21	0.803	0.553	0.0527655	3.3e-06	0.0363375	2.9e-06			-0.256223	0.115593	-0.47758	0.140011
Jilin-8 01	15.49	0.817	0.563	0.0527616	3.6e-06	0.0363367	2.8e-06			-0.330129	0.118768	-0.499593	0.138462
Jilin-8 02	15.49	0.817	0.563	0.0527629	3.9e-06	0.03634	2.8e-06			-0.32823	0.118176	-0.518834	0.130714
Jilin-8 03	15.66	0.826	0.569	0.0527582	3.7e-06	0.0363325	2.9e-06			-0.417294	0.115847	-0.725182	0.132364
Jilin-9 01	16.06	0.847	0.584	0.0527635	3.4e-06	0.0363386	3.2e-06			-0.336754	0.113586	-0.587609	0.134596
Jilin-9 02	15.36	0.811	0.558	0.0527622	3.6e-06	0.0363363	2.7e-06			-0.361388	0.115779	-0.650887	0.126027
Jilin-10 01	15.54	0.82	0.565	0.0527642	4e-06	0.0363385	3.1e-06			-0.339594	0.119487	-0.588985	0.135743
Jilin-10 02	15.92	0.84	0.579	0.0527626	3.4e-06	0.0363359	3.2e-06			-0.369912	0.112617	-0.660517	0.137494
Jilin-11 01	15.22	0.803	0.553	0.0527632	3.4e-06	0.0363361	3.2e-06			-0.31023	0.108329	-0.657765	0.140327
Jilin-11 02	15.3	0.807	0.556	0.0527645	3.4e-06	0.0363385	2.7e-06			-0.285595	0.108328	-0.591736	0.132123
Jilin-11 03	16.57	0.875	0.602	0.0527684	4.3e-06	0.0363466	3.1e-06			-0.158629	0.122076	-0.349629	0.135733
Jilin-12 01	16.81	0.887	0.611	0.0527679	4.3e-06	0.0363416	3.6e-06			-0.168105	0.122077	-0.487193	0.144782
Jilin-12 02	16.34	0.862	0.594	0.0527614	3.9e-06	0.0363392	3.3e-06			-0.309287	0.122184	-0.513336	0.139271
Jilin-12 03	16.71	0.882	0.607	0.052763	4.4e-06	0.0363373	3.1e-06			-0.278966	0.128138	-0.565613	0.13575
Jilin-13 01	15.82	0.835	0.575	0.0527642	3.6e-06	0.0363344	3.1e-06			-0.260962	0.119836	-0.6344	0.135755
Jilin-13 02	15.67	0.827	0.57	0.052762	3.4e-06	0.0363382	3.2e-06			-0.302654	0.117721	-0.529847	0.137495
Jilin-13 03	15.88	0.838	0.577	0.0527656	3.6e-06	0.0363419	2.9e-06			-0.281803	0.113744	-0.477563	0.132351
Jilin-14 01	15.56	0.821	0.565	0.0527636	3.5e-06	0.0363365	3e-06			-0.319702	0.112619	-0.626132	0.134035
Jilin-14 02	15.96	0.842	0.58	0.0527673	4.2e-06	0.0363403	3e-06			-0.264747	0.119906	-0.536713	0.135461
Jilin-14 03	16.65	0.878	0.605	0.0527684	3.5e-06	0.0363382	2.9e-06			-0.243902	0.111541	-0.594488	0.133805
Jilin-14 04	16.25	0.858	0.591	0.0527718	4e-06	0.0363446	3e-06			-0.180422	0.121271	-0.411532	0.129748
Temora-2-1 01	16.07	0.848	0.584	0.0527622	3.5e-06	0.0363389	2.8e-06			-0.331074	0.113526	-0.507836	0.143103
Temora-2-1 02	15.65	0.826	0.569	0.0527639	3.6e-06	0.0363349	2.6e-06			-0.296017	0.115687	-0.604139	0.130839
Temora-2-1 03	16.72	0.882	0.607	0.0527627	3.8e-06	0.0363389	3.1e-06			-0.318757	0.117963	-0.494081	0.138837
Temora-2-2 01	16.87	0.89	0.613	0.0527656	4.4e-06	0.0363402	3.1e-06			-0.271382	0.127105	-0.494076	0.132813
Temora-2-2 02	15.88	0.838	0.577	0.052762	3.4e-06	0.0363368	2.6e-06			-0.339601	0.115563	-0.587621	0.124428
Temora-2-2 03	15.91	0.84	0.578	0.0527639	3.6e-06	0.0363381	2.8e-06			-0.279912	0.114706	-0.500962	0.133926
Temora-2-3 01	15.56	0.821	0.565	0.052763	3.4e-06	0.0363371	3e-06			-0.296967	0.112493	-0.528477	0.137168
Temora-2-3 02	15.49	0.817	0.563	0.0527617	3.5e-06	0.0363365	2.7e-06			-0.286548	0.111487	-0.500969	0.136839
Temora-2-3 03	15.53	0.819	0.564	0.0527636	3.8e-06	0.0363358	3e-06			-0.250541	0.114959	-0.520231	0.141493
Temora-2-4 01	17.74	0.936	0.645	0.0527691	4.6e-06	0.0363454	3.6e-06			-0.168105	0.126836	-0.269835	0.147529
Temora-2-4 02	16.09	0.849	0.585	0.0527665	3.7e-06	0.036339	3.2e-06			-0.217376	0.11578	-0.445936	0.140387
Temora-2-5 01	16.38	0.864	0.595	0.0527673	3.9e-06	0.0363384	3.2e-06			-0.220218	0.120102	-0.448689	0.140389
Temora-2-5 02	15.48	0.817	0.563	0.0527615	4.1e-06	0.0363361	3.1e-06			-0.330129	0.122477	-0.511976	0.138682
Temora-2-5 03	17.6	0.929	0.639	0.0527664	3.9e-06	0.0363395	2.8e-06			-0.231588	0.120104	-0.450061	0.139951
Temora-2-6 01	15.5	0.818	0.563	0.0527618	3.5e-06	0.0363346	2.4e-06			-0.31876	0.115596	-0.584886	0.13421
Temora-2-6 02	15.48	0.817	0.562	0.0527641	4e-06	0.0363344	2.8e-06			-0.339594	0.119307	-0.659155	0.136999
Temora-2-6 03	15.4	0.813	0.56	0.0527668	3.3e-06	0.0363382	2.9e-06			-0.288432	0.111348	-0.554604	0.138561
Temora-2-7 01	15.76	0.832	0.573	0.0527639	3.9e-06	0.0363366	3.2e-06			-0.377485	0.116148	-0.637133	0.136026
Temora-2-7 02	15.54	0.82	0.565	0.0527652	3.6e-06	0.0363385	3e-06			-0.352852	0.112614	-0.584859	0.132527
Temora-2-7 03	15.43	0.814	0.561	0.0527641	3.6e-06	0.0363336	2.6e-06			-0.280859	0.114706	-0.67979	0.125973
Temora-2-8 01	15.29	0.807	0.555	0.0527626	3.5e-06	0.0363358	2.9e-06			-0.309284	0.11359	-0.619261	0.130837
Temora-2-8 02	15.35	0.81	0.558	0.0527644	3.7e-06	0.0363386	2.8e-06			-0.266647	0.123102	-0.510588	0.129175
Temora-2-8 03	15.24	0.804	0.554	0.0527656	3.7e-06	0.0363364	2.9e-06			-0.243906	0.123101	-0.57112	0.130838
Temora-2-9 01	15.35	0.81	0.558	0.0527617	3.9e-06	0.0363346	3e-06			-0.370863	0.120701	-0.637149	0.135585
Temora-2-9 02	15.73	0.83	0.572	0.0527672	3.5e-06	0.0363422	3.3e-06			-0.266642	0.116209	-0.428044	0.140753
Temora-2-9 03	13.75	0.726	0.5	0.0527616	3.4e-06	0.0363348	2.7e-06			-0.381283	0.111674	-0.6509	0.133697
Temora-2-9 04	15.59	0.823	0.567	0.052768	3.9e-06	0.0363399	2.7e-06			-0.260009	0.117392	-0.510582	0.133691
Temora-2-9 05	15.72	0.83	0.571	0.0527677	3.8e-06	0.0363392	3.4e-06			-0.272325	0.121996	-0.584855	0.142437
Temora-2-10 01	15.64	0.825	0.568	0.0527644	3.7e-06	0.0363333	3.1e-06			-0.334857	0.12089	-0.747174	0.137165
Temora-2-10 02	15.52	0.819	0.564	0.0527656	3.8e-06	0.036336	2.8e-06			-0.336748	0.119978	-0.689394	0.133747
Temora-2-10 03	15.61	0.824	0.567	0.0527662	3.4e-06	0.0363393	2.5e-06			-0.325378	0.115587	-0.598606	0.129164
Temora-2-11 01	15.39	0.812	0.559	0.0527653	3.1e-06	0.0363379	2.8e-06			-0.342432	0.113644	-0.612369	0.133747
Temora-2-11 02	15.36	0.81	0.558	0.0527694	3.9e-06	0.0363397	2.9e-06			-0.264743	0.12217	-0.562847	0.135349
Temora-2-11 03	15.24	0.804	0.554	0.0527627	3.7e-06	0.0363358	3.2e-06			-0.422956	0.120917	-0.737521	0.140375
Temora-2-12 01	15.77	0.832	0.573	0.0527689	3.8e-06	0.0363421	3.1e-06			-0.305478	0.122021	-0.564208	0.138656
Temora-2-12 02	15.49	0.817	0.563	0.0527689	3.3e-06	0.0363396	3.1e-06			-0.260007	0.11242	-0.57385	0.141581
Temora-2-12 03	15.36	0.811	0.558	0.0527661	3.5e-06	0.0363407	3.4e-06			-0.313064	0.114574	-0.543587	0.146702
Temora-2-12 04	15.63	0.825	0.568	0.0527659	3.9e-06	0.0363427	3e-06			-0.191794	0.125647	-0.39778	0.146291
Temora-2-13 01	15.59	0.823	0.566	0.052765	3.8e-06	0.0363397	3.2e-06			-0.20885	0.124542	-0.480323	0.14947
Temora-2-13 02	15.47	0.816	0.562	0.0527672	3.8e-06	0.0363391	3.2e-06			-0.14252	0.129421	-0.470696	0.148073
Temora-2-13 03	15.23	0.803	0.553	0.0527628	4.3e-06	0.0363411	2.9e-06			-0.225907	0.134927	-0.415666	0.143315
Temora-2-14 01	15.23	0.803	0.553	0.0527619	3.8e-06	0.0363378	3.3e-06			-0.328233	0.120227	-0.553231	0.145024
Temora-2-14 02	15.86	0.837	0.576	0.0527667	3.5e-06	0.0363395	3e-06			-0.237273	0.116906	-0.506458	0.14
Temora-2-14 03	15.3	0.808	0.556	0.0527656	3.7e-06	0.0363374	2.6e-06			-0.328222	0.114794	-0.635751	0.132294
Temora-2-15 01	16.16	0.853	0.587	0.0527638	3.8e-06	0.0363382	3.1e-06			-0.36233	0.115963	-0.613742	0.140213
Temora-2-15 02	15.75	0.831	0.572	0.0527658	4e-06	0.0363393	3.1e-06			-0.288434	0.121277	-0.49683	0.141803
Temora-2-15 03	17.56	0.927	0.638	0.0527694	4.7e-06	0.0363396	3.5e-06			-0.220216	0.129978	-0.488576	0.148685
Temora-2-16 01	15.26	0.805	0.555	0.0527654	3.8e-06	0.036336	3.5e-06			-0.299803	0.123098	-0.634387	0.148688
Temora-2-16 02	15.35	0.81	0.558	0.0527712	3.4e-06	0.0363427	2.8e-06			-0.189897	0.118818	-0.450051	0.136988
Temora-2-16 03	18.86	0.995	0.686	0.0527772	4.7e-06	0.0363522	4.2e-06			-0.0563016	0.133782	-0.184552	0.155231
GHR1-1 01	15.67	0.825	0.567	0.0526385	3.2e-06	0.0361734	2.8e-06			-0.301066	0.111191	-0.602555	0.142411
GHR1-2 01	15.29	0.805	0.553	0.0526397	3.3e-06	0.0361791	3e-06			-0.278272	0.11224	-0.445022	0.145482
GHR1-3 01	15.53	0.818	0.562	0.0526444	3.8e-06	0.0361847	3.4e-06			-0.318142	0.120479	-0.429809	0.154823
GHR1-3 02	15.77	0.83	0.57	0.0526434	3.1e-06	0.0361798	2.5e-06			-0.337135	0.113015	-0.565213	0.141124
GHR1-4 01	15.74	0.828	0.569	0.0526378	3.3e-06	0.0361773	3.2e-06			-0.455834	0.105474	-0.609433	0.145373
GHR1-5 01	15.56	0.819	0.563	0.052627	3.6e-06	0.0361661	3.4e-06			-0.660952	0.108967	-0.918936	0.14882
GHR1-6 01	15.66	0.824	0.567	0.0526473	3.5e-06	0.0361838	3e-06			-0.24977	0.104765	-0.398034	0.139028
GHR1-6 02	15.57	0.819	0.563	0.0526339	3.8e-06	0.0361703	3.1e-06			-0.504273	0.108483	-0.771107	0.140713
GHR1-7 01	16.54	0.87	0.598	0.0526183	3.4e-06	0.0361432	3.1e-06			-0.404654	0.109641	-0.742403	0.142356
GHR1-7 02	16.62	0.874	0.601	0.0526136	3.4e-06	0.0361415	3.2e-06			-0.493956	0.109644	-0.78942	0.144042
GHR1-8 01	15.98	0.841	0.578	0.0526167	3.2e-06	0.036142	2.9e-06			-0.398962	0.106385	-0.694033	0.137524
GHR1-8 02	16.6	0.874	0.6	0.0526154	2.6e-06	0.0361426	2.5e-06			-0.423664	0.100304	-0.677438	0.131374
GHR1-9 01	18.39	0.968	0.665	0.0526197	2.9e-06	0.0361493	3.1e-06			-0.310612	0.103231	-0.496272	0.135273
GHR1-10 01	16.46	0.866	0.595	0.0526174	3.1e-06	0.0361476	2.9e-06			-0.354316	0.105311	-0.543292	0.131837
GHR1-10 02	16.39	0.863	0.592	0.0526174	3.5e-06	0.0361443	2.9e-06			-0.373313	0.108736	-0.666363	0.128667
GHR1-11 01	15.97	0.84	0.577	0.0526125	3.4e-06	0.0361461	2.7e-06			-0.46642	0.107587	-0.616579	0.125289
GHR1-12 01	16.74	0.881	0.605	0.0526126	3.4e-06	0.0361399	3.1e-06			-0.488263	0.108605	-0.844727	0.13494
GHR1-13 01	16.58	0.872	0.599	0.0526067	3.4e-06	0.0361388	3.4e-06			-0.600368	0.108609	-0.875149	0.140365
GHR1-14 01	16.45	0.866	0.595	0.0526176	3.6e-06	0.0361489	3.6e-06			-0.359064	0.109002	-0.580613	0.142755
GHR1-14 02	16.34	0.86	0.59	0.052615	3e-06	0.0361438	2.3e-06			-0.408468	0.102232	-0.721662	0.12046
GHR1-15 01	15.77	0.83	0.57	0.0526151	3e-06	0.0361393	2.3e-06			-0.387571	0.10115	-0.783918	0.123727
GHR1-15 02	16.06	0.845	0.581	0.0526227	2.8e-06	0.0361496	2.5e-06			-0.243157	0.0990534	-0.499036	0.126652
GHR1-16 01	15.66	0.824	0.566	0.0526175	3e-06	0.0361473	2.9e-06			-0.365714	0.107582	-0.588919	0.140703
GHR1-16 02	15.64	0.823	0.565	0.0526141	3.1e-06	0.036141	2.6e-06			-0.430319	0.108604	-0.763163	0.136149
GHR1-17 01	15.43	0.812	0.558	0.0526074	3.9e-06	0.0361387	3.2e-06			-0.573772	0.120421	-0.883443	0.150027
GHR1-18 01	15.21	0.8	0.55	0.0526176	3.4e-06	0.0361478	2.9e-06			-0.379962	0.114807	-0.631772	0.145271
GHR1-19 01	15.39	0.81	0.557	0.0526229	3.4e-06	0.0361523	3e-06			-0.253607	0.114806	-0.52391	0.145265
GHR1-20 01	14.63	0.77	0.529	0.0526194	3.4e-06	0.0361488	3.7e-06			-0.320112	0.114808	-0.620705	0.157138
GHR1-21 01	15	0.789	0.542	0.0526143	3.5e-06	0.0361479	2.9e-06			-0.458811	0.116928	-0.670477	0.139081
GHR1-21 02	14.96	0.787	0.541	0.0526182	3.3e-06	0.0361514	3.3e-06			-0.384708	0.114805	-0.573685	0.145739
GHR1-22 01	15.04	0.791	0.544	0.0526277	3.2e-06	0.0361558	3.3e-06			-0.2498	0.114859	-0.543246	0.145724
GHR1-23 01	14.7	0.774	0.532	0.0526282	3.2e-06	0.0361598	3.4e-06			-0.2403	0.114858	-0.432636	0.147466
GHR1-24 01	15.16	0.798	0.548	0.0526161	3.5e-06	0.0361478	3.3e-06			-0.502487	0.115945	-0.85429	0.150148
GHR1-25 01	14.4	0.758	0.521	0.0526223	3.2e-06	0.0361595	3.1e-06			-0.384692	0.112767	-0.530785	0.146834
GHR1-26 01	13.71	0.721	0.496	0.0526171	3.2e-06	0.0361517	2.6e-06			-0.538566	0.116218	-0.798965	0.133154
GHR1-27 01	15.26	0.803	0.552	0.0526244	3.8e-06	0.0361605	3.2e-06			-0.399879	0.122565	-0.555658	0.14279
GHR1-28 01	15.15	0.797	0.548	0.0526323	3.5e-06	0.0361637	2.9e-06			-0.298232	0.120266	-0.577751	0.12849
GHR1-29 01	14.92	0.785	0.539	0.0526276	3e-06	0.0361608	2.7e-06			-0.387519	0.115287	-0.657923	0.125116
MUN-zircon-1 01	14.58	0.768	0.528	0.0526926	3.5e-06	0.0362376	3.1e-06			-1.04033	0.113681	-2.00813	0.135996
MUN-zircon-1 02	14.59	0.769	0.529	0.0526826	4e-06	0.0362339	2.7e-06			-1.26499	0.117662	-2.10044	0.133926
MUN-zircon-1 03	14.79	0.78	0.536	0.052693	3.9e-06	0.0362399	2.5e-06			-1.06779	0.116437	-1.93514	0.130929
MUN-zircon-1 04	14.6	0.769	0.529	0.0526897	3.6e-06	0.0362379	3.1e-06			-1.16541	0.113997	-2.06724	0.138916
MUN-zircon-1 05	14.64	0.772	0.531	0.0527012	3.5e-06	0.0362449	2.9e-06			-0.947366	0.112861	-1.87441	0.135578
MUN-zircon-1 06	14.34	0.756	0.52	0.052701	3.7e-06	0.036245	2.9e-06			-0.955894	0.120981	-1.87166	0.135578
MUN-zircon-1 07	14.28	0.752	0.518	0.0527052	3e-06	0.0362502	2.7e-06			-0.876262	0.113786	-1.72841	0.132391
MUN-zircon-1 08	13.96	0.736	0.506	0.0527029	3.6e-06	0.0362475	3e-06			-0.861135	0.120953	-1.69274	0.138688
MUN-zircon-1 09	14.02	0.739	0.508	0.0527103	3.5e-06	0.0362514	3.2e-06			-0.720822	0.119886	-1.5853	0.142043
MUN-zircon-1 10	13.88	0.731	0.503	0.0527001	3.5e-06	0.0362456	2.8e-06			-0.852644	0.120958	-1.72033	0.135472
MUN-zircon-1 11	13.74	0.724	0.498	0.0527081	3.7e-06	0.0362539	2.8e-06			-0.700946	0.123076	-1.49165	0.135462
MUN-zircon-1 12	13.71	0.722	0.497	0.0526912	3.5e-06	0.0362428	2.8e-06			-1.08109	0.122039	-1.86074	0.143496
MUN-zircon-2 01	13.27	0.699	0.481	0.0526922	4.2e-06	0.0362375	3.1e-06			-1.06212	0.129749	-2.00676	0.148124
MUN-zircon-2 02	13.39	0.705	0.485	0.0526888	4e-06	0.0362393	3.5e-06			-1.25065	0.122632	-2.09468	0.154748
MUN-zircon-2 03	13.35	0.703	0.484	0.0526921	3.6e-06	0.0362413	3.3e-06			-1.18809	0.11808	-2.03958	0.151362
MUN-zircon-2 04	13.68	0.721	0.496	0.0526886	3.7e-06	0.036242	3e-06			-1.04987	0.118101	-1.69295	0.144923
MUN-zircon-2 05	13.73	0.723	0.498	0.0526904	3.7e-06	0.0362427	2.9e-06			-1.01574	0.1181	-1.67366	0.143364
MUN-zircon-2 06	14.25	0.751	0.516	0.0526684	3.5e-06	0.0362157	3.3e-06			-1.23971	0.118897	-2.07105	0.15131
MUN-zircon-2 07	14.23	0.749	0.515	0.0526761	3.4e-06	0.036222	2.8e-06			-1.09366	0.117842	-1.8974	0.143413
MUN-zircon-2 08	14.4	0.759	0.522	0.0526853	3.6e-06	0.036226	2.6e-06			-1.04045	0.118878	-1.95088	0.12967
MUN-zircon-2 09	14.42	0.76	0.522	0.0526817	3.5e-06	0.0362255	2.7e-06			-1.10872	0.1178	-1.96466	0.131219
MUN-zircon-2 10	14.67	0.773	0.531	0.0526779	3.4e-06	0.0362215	2.4e-06			-1.21773	0.118876	-2.17531	0.124972
MUN-zircon-3 01	13.97	0.736	0.506	0.0526771	3.9e-06	0.0362156	2.6e-06			-1.2329	0.124286	-2.3379	0.127992
MUN-zircon-3 02	14	0.737	0.507	0.0526738	3.7e-06	0.036216	2.8e-06			-1.17139	0.122074	-2.1357	0.134047
MUN-zircon-3 03	14	0.738	0.507	0.0526723	3.6e-06	0.0362112	2.8e-06			-1.19984	0.120993	-2.268	0.134053
MUN-zircon-3 04	13.78	0.726	0.499	0.0526585	3.6e-06	0.0362031	3e-06			-1.45589	0.118905	-2.4665	0.132857
MUN-zircon-3 05	14.13	0.744	0.512	0.0526708	3.6e-06	0.0362146	3.2e-06			-1.22261	0.118896	-2.14952	0.136353
MUN-zircon-3 06	14.03	0.739	0.508	0.0526829	3.6e-06	0.0362239	3.4e-06			-1.07365	0.116805	-2.0459	0.139968
MUN-zircon-3 07	13.93	0.734	0.504	0.0526771	3.4e-06	0.0362213	2.8e-06			-1.18364	0.11463	-2.11755	0.129448
MUN-zircon-3 08	13.8	0.727	0.5	0.0526798	4e-06	0.0362233	3.5e-06			-1.15517	0.119434	-2.08307	0.153754
MUN-zircon-3 09	13.67	0.72	0.495	0.052685	4.2e-06	0.0362247	3e-06			-1.05656	0.121878	-2.04449	0.145474
MUN-zircon-3 10	13.86	0.73	0.502	0.0526854	3.6e-06	0.0362268	2.3e-06			-1.07929	0.116862	-2.03063	0.139954
MUN-zircon-3 11	13.7	0.722	0.496	0.0526768	3.6e-06	0.0362114	2.6e-06			-1.24238	0.116868	-2.45502	0.143915
MUN-zircon-4 01	13.27	0.699	0.481	0.0526765	4e-06	0.036217	3.6e-06			-1.24712	0.122424	-2.32545	0.15641
MUN-zircon-4 02	13.18	0.694	0.477	0.0526681	3.6e-06	0.0362032	2.9e-06			-1.40641	0.11787	-2.70573	0.144914
MUN-zircon-4 03	13.29	0.7	0.481	0.0526625	3.9e-06	0.0361973	3.2e-06			-1.51734	0.122315	-2.86144	0.151153
MUN-zircon-4 04	13.31	0.701	0.482	0.0526736	3.9e-06	0.0362053	2.8e-06			-1.30685	0.122306	-2.64099	0.144958
MUN-zircon-4 05	13.16	0.693	0.476	0.0526551	3.6e-06	0.0361933	3.3e-06			-1.60086	0.126451	-2.9002	0.145543
MUN-zircon-4 06	13.31	0.701	0.482	0.0526675	3.4e-06	0.036207	2.6e-06			-1.3657	0.12443	-2.52265	0.134261
MUN-zircon-4 07	13.11	0.69	0.475	0.0526629	3.8e-06	0.0362029	3e-06			-1.57982	0.127532	-2.79509	0.134282
MUN-zircon-4 08	13.06	0.688	0.473	0.0526809	3.9e-06	0.0362215	3e-06			-1.2385	0.128602	-2.28258	0.134256
MUN-zircon-5 01	12.71	0.669	0.46	0.0526767	3.6e-06	0.0362186	3.5e-06			-1.3172	0.122056	-2.34048	0.152142
MUN-zircon-5 02	14.16	0.746	0.513	0.0526751	4.3e-06	0.0362197	3.5e-06			-1.23483	0.126268	-2.1754	0.153466
MUN-zircon-5 03	12.71	0.67	0.461	0.0526868	3.7e-06	0.0362302	2.7e-06			-1.01295	0.119212	-1.88604	0.140598
MUN-zircon-5 04	12.85	0.677	0.465	0.0526797	3.9e-06	0.0362214	3.5e-06			-1.18075	0.118295	-2.16707	0.156691
MUN-zircon-5 05	12.89	0.679	0.467	0.0526799	3.6e-06	0.0362257	3e-06			-1.17696	0.114817	-2.04857	0.148571
MUN-zircon-5 06	12.97	0.683	0.47	0.0526786	3.9e-06	0.0362225	3e-06			-1.09836	0.126531	-2.06247	0.152889
MUN-zircon-5 07	13.1	0.69	0.475	0.0526921	3.7e-06	0.0362325	2.9e-06			-0.842324	0.124337	-1.78688	0.1514
MUN-zircon-5 08	13.14	0.692	0.476	0.0526785	3.4e-06	0.0362271	2.8e-06			-1.03583	0.123286	-1.93157	0.138733

## Sheet: Table S8 magma differentiation 
Table S8 Magma differentiation indicators (Zr/Hf and Eu/Eu*)
Sample	Zr/Hf	2SD	δ30Sia (‰)	2SD
Ban-1	71.93b	1.83	-0.36	0.12
Tanz	42.19c	2.71	-0.42	0.15
LKZ-1	49.51d	2.48	-0.7	0.22
SA01	56.4e	2.82	-0.33	0.16
Penglai	78.64f	3.15	-0.29	0.13
91500	66.23g	3.31	-0.4	0.15
GJ-1	68.81b	3.75	-0.38	0.12
Jilin	53.31h	2.67	-0.55	0.17
Qinghu	41.62i	5.22	-0.52	0.2
Plešovice	42.49j	3.06	-0.43	0.12
Sample	Eu/Eu*	2SD	δ30Sia (‰)	2SD
Ban-1	1.04b	0.21	-0.36	0.12
Tanz	0.84c	0.25	-0.42	0.15
LKZ-1	0.41d	0.14	-0.7	0.22
SA01	1.16e	0.11	-0.33	0.16
Penglai	1.07f	0.04	-0.29	0.13
91500	0.69g	0.06	-0.4	0.15
GJ-1	0.94b	0.4	-0.38	0.12
Jilin	0.15h	0.01	-0.55	0.17
Qinghu	0.19i	0.1	-0.52	0.2
Temora-2	0.31k	0.02	-0.54	0.21
GHR1	0.01l	0.000583	-0.64	0.28
Plešovice	0.44j	0.03	-0.43	0.12
a: data from this study; b: data from Xie et al. (2022); c: data from Hu et al. (2021); d: data from Cheong et al. (2019); e: data from Huang et al. (2019); f: data from Li et al. (2010); g: data from Wiedenbeck et al. (2004); h: data from Luo et al. (2021); i: data from Li et al. (2013); j: data from Slama et al. (2008); k: data from Yuan et al. (2008); l: data from Eddy et al. (2018)
